# Supplementary material for: Altered Progesterone Receptor Isoform Expression Remodels Progestin Responsiveness of Breast Cancer Cells
Source: Oxford University Press journal article supplement (doi:10.1210/me.2005-0126), 2005-06-24
Supplement: supplemental_table_1.doc [file supplemental_table_1.doc]

**Supplemental Table 1**

| Symbol | GenBank ID | Fold regulation by progestin at 48h | | | | Regulated at 6h | | RT-PCR quantitation @ | | Gene Name |
| --- | --- | --- | --- | --- | --- | --- | --- | --- | --- | --- |
| PRA:  PRB  = 1.8 | ± SEM | PRA:  PRB  = 5.1 | ± SEM | PRA:  PRB  = 1.8 | PRA:  PRB  = 5.1 | PRA:  PRB  = 1.8 | PRA:  PRB  = 5.1 |
| 23612 | H64850 | -2.85 | 0.29, 0.26 | -2.09 | 0.42, 0.35 |  |  |  |  | Clone 23612 |
| 23945 | T60121 | 1.25 | 0.17, 0.20 | 3.08 | 0.70, 0.91 |  |  |  |  | Clone 23945 |
| 24841 | H10713 | 2.42 | 0.06, 0.06 | 1.34 | 0.28, 0.36 |  |  |  |  | Clone 24841 |
| ABCC5 | N68159 | -1.15 | 0.09, 0.08 | -2.22 | 0.17, 0.16 |  |  |  |  | Multidrug resistance-associated protein homolog (MRP5) |
| ABCD3 | AA234671 | -2.87 | 0.51, 0.44 | -2.70 | 0.10, 0.10 |  |  |  |  | ATP-binding cassette, sub-family D (ALD), member 3 |
| ABI2 | N21334 | -2.67 | 0.12, 0.11 | -2.23 | 0.50, 0.41 |  |  |  |  | Arg protein tyrosine kinase-binding protein |
| ACADM | N70794 | 2.37 | 0.37, 0.44 | 1.06 | 0.09, 0.10 |  |  |  |  | Acyl-Coenzyme A dehydrogenase C-4 to C-12 straight chain |
| ACO1 | AA156988 | -1.14 | 0.05, 0.05 | 2.19 | 0.06, 0.06 |  |  |  |  | Aconitase 1, soluble |
| ACOX1 | H65660 | 5.87 | 0.49, 0.54 | 2.42 | 0.15, 0.15 |  |  |  |  | Peroxisomal acyl-CoA oxidase |
| ACSL1 | T73556 | 22.66 | 3.82, 4.60 | 10.36 | 0.15, 0.15 | 2.68 | 1.51 |  |  | Acyl-CoA synthetase long-chain family member 1 |
| ACTR1A | AA456850 | 2.36 | 0.33, 0.39 | 1.57 | 0.17, 0.19 |  |  |  |  | Alpha centractin |
| ACTR3 § | AA164562 | 1.50 | 0.10, 0.10 | 2.71 | 0.17, 0.19 |  |  | 2.87 | 7.11 R | ARP3 actin-related protein 3 homolog |
| ADAM9 | H59231 | 2.54 | 0.04, 0.04 | 1.17 | 0.04, 0.04 |  |  |  |  | A disintegrin and metalloproteinase domain 9 |
| ADD3 | AA461325 | 3.01 | 0.15, 0.16 | 2.21 | 0.22, 0.25 | 2.13 | 1.55 |  |  | Adducin 3 (gamma) |
| ADFP | AA700054 | 3.16 | 0.24, 0.26 | 3.08 | 0.36, 0.41 |  |  |  |  | Adipophilin |
| ADM | AA446120 | -1.02 | 0.02, 0.02 | 3.13 | 0.18, 0.19 |  |  |  |  | Adrenomedullin precursor |
| AFURS1 | H48097 | -2.81 | 0.18, 0.17 | -1.76 | 0.11, 0.11 |  |  |  |  | ATPase family homolog up-regulated in senescence cells |
| AGRN | AA458878 | -1.46 | 0.06, 0.06 | -2.07 | 0.05, 0.05 |  |  |  |  | Agrin |
| AKR1C1 | R93124 | 1.09 | 0.00, 0.00 | 2.17 | 0.61, 0.86 |  |  |  |  | Dihydrodiol dehydrogenase |
| AKT1 | AA464217 | 2.29 | 0.39, 0.48 | 2.81 | 0.91, 1.34 |  |  |  |  | V-akt murine thymoma viral oncogene homolog 1 |
| ALCAM | R39862 | 3.09 | 0.44, 0.51 | 1.41 | 0.08, 0.09 |  |  |  |  | Activated leucocyte cell adhesion molecule |
| ALDH1A3 | AA455235 | -1.05 | 0.01, 0.01 | 3.11 | 0.14, 0.14 |  |  |  |  | Aldehyde dehydrogenase 6 |
| ALDH2 | R93551 | -1.50 | 0.04, 0.04 | -3.41 | 0.02, 0.02 |  |  |  |  | Aldehyde dehydrogenase mitochondrial X precursor |
| ALDH4A1 | H11346 | 3.86 | 0.06, 0.06 | 2.34 | 0.30, 0.35 |  |  |  |  | Aldehyde dehydrogenase 4 family, member A1 |
| ALDH7A1 | AA102646 | 1.70 | 0.10, 0.10 | -2.26 | 0.20, 0.18 |  |  |  |  | Antiquitin |
| ALDOC | R39463 | 1.50 | 0.18, 0.21 | 2.00 | 0.15, 0.16 |  |  |  |  | Aldolase C fructose-bisphosphate |
| ALOX5AP | T49652 | 3.36 | 0.17, 0.18 | 2.46 | 0.07, 0.07 |  |  |  |  | 5-lipoxygenase activating protein |
| AMOT | AA496984 | -4.11 | 0.35, 0.32 | -5.37 | 1.86, 1.38 |  |  |  |  | Angiomotin |
| ANKS1 | N22435 | 2.01 | 0.16, 0.17 | 2.10 | 0.07, 0.07 |  |  |  |  | Ankyrin repeat and sterile alpha motif domain containing 1 |
| ANXA1 | H63077 | 4.18 | 0.64, 0.75 | 4.38 | 0.07, 0.08 |  |  |  |  | Annexin I (lipocortin I) |
| ANXA11 | AA464982 | 1.43 | 0.09, 0.09 | 2.86 | 0.12, 0.13 |  |  |  |  | Annexin XI (56kD autoantigen) |
| ANXA6 | AA872001 | -1.66 | 0.02, 0.02 | -2.02 | 0.05, 0.05 |  |  |  |  | Annexin VI (p68) |
| AP2S1 | AA421518 | 2.73 | 0.10, 0.11 | -1.20 | 0.08, 0.08 |  |  |  |  | Clathrin-associated protein |
| APOD | AA457084 | -2.57 | 0.29, 0.26 | -3.08 | 0.17, 0.16 |  |  |  |  | Apolipoprotein D |
| AREG | AA857163 | -5.35 | 0.27, 0.25 | -2.99 | 0.09, 0.09 |  |  |  |  | Amphiregulin (schwannoma-derived growth factor) |
| ARF4L | H15085 | 4.07 | 0.42, 0.46 | 4.40 | 0.54, 0.61 | 2.71 | 4.23 |  |  | ADP-ribosylation factor 4-like |
| ARFRP1 | AA629904 | 2.00 | 0.22, 0.24 | 1.67 | 0.12, 0.13 |  |  |  |  | ADP-ribosylation factor related protein 1 |
| ARHE § | AA443302 | 2.46 | 0.19, 0.21 | 4.08 | 0.20, 0.22 |  |  | 2.73S  4.44R | 5.42S  13.00R | RhoE |
| ARHGAP12 | N64669 | -1.31 | 0.04, 0.04 | -2.10 | 0.23, 0.21 |  |  |  |  | Rho GTPase activating protein 12 |
| ARHGDIB | AA487426 | -2.55 | 0.17, 0.16 | -5.16 | 0.48, 0.44 |  |  |  |  | Rho GDP dissociation inhibitor (GDI) beta |
| ARHGEF2 | AA464578 | -2.23 | 0.12, 0.11 | -2.25 | 0.52, 0.42 |  |  |  |  | Rho/rac guanine nucleotide exchange factor (GEF) 2 |
| ARID4B | H38848 | -1.30 | 0.04, 0.04 | 2.63 | 0.17, 0.18 |  |  |  |  | AT rich interactive domain 4B (RBP1- like) |
| ARL3 | AA644191 | -2.30 | 0.30, 0.27 | -2.31 | 0.21, 0.19 |  |  |  |  | ADP-ribosylation factor-like 3 |
| ARL4A | AA779165 | 1.81 | 0.07, 0.07 | 5.77 | 0.64, 0.72 |  |  |  |  | ADP-ribosylation factor-like 4A |
| ARMC8 | AA055975 | -2.21 | 0.01, 0.01 | 1.37 | 0.01, 0.01 |  |  |  |  | Armadillo repeat containing 8 |
| ARSA | H45449 | 2.67 | 0.46, 0.55 | 1.56 | 0.20, 0.23 |  |  |  |  | Arylsulfatase A |
| ASNS | AA894927 | -2.37 | 0.18, 0.17 | -1.93 | 0.30, 0.26 |  |  |  |  | Asparagine synthetase |
| ASS | AA676466 | -1.10 | 0.02, 0.02 | -3.08 | 0.11, 0.11 |  |  |  |  | Argininosuccinate synthetase |
| ATBF1 | AA281616 | 3.66 | 0.30, 0.33 | 1.99 | 0.00, 0.00 |  |  |  |  | AT-binding transcription factor 1 |
| ATF3 | H21042 | 2.19 | 0.06, 0.06 | 3.37 | 0.38, 0.42 |  |  |  |  | Activating transcription factor 3 |
| ATP1A1 | AA873355 | 10.38 | 1.24, 1.41 | 6.76 | 0.24, 0.25 | 3.52 | 3.54 |  |  | ATPase Na+/K+ transporting alpha 1 polypeptide |
| ATP1B3 | AA486417 | -2.48 | 0.10, 0.09 | -1.21 | 0.04, 0.04 |  |  |  |  | ATPase, Na+/K+ transporting, beta 3 polypeptide |
| ATP6V0D1 | AA702541 | 2.78 | 0.32, 0.37 | 2.13 | 0.18, 0.19 |  |  |  |  | ATPase H+ transporting lysosomal (vacuolar proton pump) 31kD |
| ATP7A | W57930 | 1.31 | 0.14, 0.16 | 2.18 | 0.06, 0.06 |  |  |  |  | ATPase Cu++ transporting alpha polypeptide (Menkes syndrome) |
| AURKB | AA071486 | -3.82 | 1.65, 1.15 | -3.55 | 0.46, 0.41 |  |  |  |  | Aurora kinase B |
| AXL | H15718 | 2.12 | 0.14, 0.15 | -1.09 | 0.02, 0.02 |  |  |  |  | AXL receptor tyrosine kinase |
| AZGP1 | AA862465 | 12.30 | 0.20, 0.20 | 1.09 | 0.03, 0.03 |  |  |  |  | Alpha-2-glycoprotein 1, zinc |
| B7 | N90281 | 3.51 | 0.94, 1.28 | 1.17 | 0.13, 0.15 |  |  |  |  | B7 gene |
| BAT3 | AA598629 | 2.00 | 0.04, 0.04 | 1.63 | 0.04, 0.05 |  |  |  |  | HLA-B associated transcript 3 |
| BDH | T67057 | -1.19 | 0.04, 0.04 | -2.01 | 0.04, 0.04 |  |  |  |  | 3-hydroxybutyrate dehydrogenase (heart, mitochondrial) |
| BNIP3 | AA446839 | 4.58 | 0.28, 0.30 | 1.55 | 0.06, 0.06 |  |  |  |  | Data not found |
| BST2 | AA485371 | -1.12 | 0.03, 0.03 | -2.70 | 0.10, 0.10 |  |  |  |  | Bone marrow stromal cell antigen 2 |
| BTBD3 | AA454990 | 2.12 | 0.55, 0.74 | 1.28 | 0.19, 0.22 | 2.77 | 3.77 |  |  | BTB (POZ) domain containing 3 |
| BTG1 | N70463 | 2.15 | 0.08, 0.09 | 1.37 | 0.03, 0.03 |  |  |  |  | B-cell translocation gene 1 anti-proliferative |
| BUB1 | AA446462 | -2.82 | 0.26, 0.24 | -2.47 | 0.41, 0.35 |  |  |  |  | BUB1 budding uninhibited by benzimidazoles 1 homolog (yeast) |
| BYSL | AA701929 | -2.21 | 0.30, 0.27 | -1.71 | 0.18, 0.16 |  |  |  |  | Bystin-like |
| C10orf18 | N36172 | 1.48 | 0.15, 0.16 | 2.93 | 0.38, 0.43 |  |  |  |  | Chromosome 10 open reading frame 18 |
| C11orf8 | AA020011 | -1.41 | 0.13, 0.12 | -2.01 | 0.32, 0.27 |  |  |  |  | chromosome 11 open reading frame 8 |
| C14orf109 | AA679569 | -1.19 | 0.06, 0.06 | 2.36 | 0.02, 0.02 |  |  |  |  | Chromosome 14 open reading frame 109 |
| C14orf116 | H84982 | 2.86 | 0.14, 0.15 | 1.83 | 0.05, 0.05 |  |  |  |  | Checkpoint suppressor 1 |
| C14orf120 | T49713 | -1.52 | 0.09, 0.09 | -2.72 | 0.21, 0.20 |  |  |  |  | Chromosome 14 open reading frame 120 |
| C2orf22 | AA490828 | 1.94 | 0.03, 0.04 | 2.10 | 0.04, 0.05 |  |  |  |  | glyceraldehyde-3-phosphate dehydrogenase |
| C4A | AA664406 | 3.62 | 0.57, 0.67 | 2.55 | 0.06, 0.06 |  |  |  |  | Complement component 4A |
| C6orf130 | AA405625 | 4.12 | 0.12, 0.12 | 1.53 | 0.12, 0.13 | 1.88 | 2.50 |  |  | Chromosome 6 open reading frame 130 |
| C9orf114 | AA629804 | 1.08 | 0.07, 0.08 | 2.45 | 0.11, 0.11 |  |  |  |  | Endonuclease G (ENDOG) mRNA |
| C9orf13 | R32025 | 1.55 | 0.27, 0.32 | 3.79 | 1.41, 2.24 | 7.94 | 2.69 |  |  | Chromosome 9 open reading frame 13 |
| CA12 | AA171613 | 1.17 | 0.11, 0.12 | -3.72 | 0.13, 0.12 |  |  |  |  | Carbonic anhydrase XII |
| CAGH3 | N57754 | n.d. | , | 3.98 | 1.12, 1.55 |  |  |  |  | CAGH3 |
| CAP2 | AA045508 | 2.38 | 0.39, 0.46 | -1.08 | 0.03, 0.03 |  |  |  |  | CAP, adenylate cyclase-associated protein, 2 (yeast) |
| CAPN2 | AA102454 | 4.37 | 0.35, 0.38 | 2.43 | 0.10, 0.11 |  |  |  |  | Calpain 2, (m/II) large subunit |
| CASK | AA045965 | -2.17 | 0.26, 0.23 | -1.94 | 0.14, 0.13 |  |  |  |  | Calcium/calmodulin-dependent serine protein kinase (MAGUK family) |
| CASP7 | T50675 | -1.28 | 0.05, 0.05 | -2.36 | 0.09, 0.09 |  |  |  |  | Caspase 7, apoptosis-related cysteine protease |
| CASR | AA862999 | 5.14 | 1.20, 1.57 | -1.07 | 0.02, 0.02 |  |  |  |  | Calcium-sensing receptor (hypocalciuric hypercalcemia 1 severe neonatal hyperparathyroidism) |
| CBX5 | AA192411 | -2.07 | 0.07, 0.07 | -3.27 | 0.10, 0.10 |  |  |  |  | Chromobox homolog 5 (HP1 alpha homolog, Drosophila) |
| CCNG2 | AA489647 | 2.97 | 0.09, 0.10 | -1.59 | 0.11, 0.10 | -1.68 | -2.20 |  |  | Cyclin G2 |
| CD24 | H59916 | 3.35 | 0.24, 0.26 | 1.91 | 0.05, 0.05 |  |  |  |  | CD24 antigen (small cell lung carcinoma cluster 4 antigen) |
| CD59 | H60549 | 6.60 | 1.14, 1.38 | 3.54 | 0.55, 0.66 |  |  |  |  | CD59 antigen p18-20 (antigen identified by monoclonal antibodies 16.3A5 EJ16 EJ30 EL32 and G344) |
| CD9 | AA412053 | 2.37 | 0.04, 0.04 | 1.57 | 0.10, 0.10 | 1.79 | 2.61 |  |  | CD9 antigen |
| CD99L2 | AA490911 | 2.89 | 0.34, 0.39 | 1.84 | 0.16, 0.18 |  |  |  |  | CD99 antigen-like 2 |
| CDC2 | AA598974 | -3.97 | 1.21, 0.92 | -2.77 | 0.22, 0.20 |  |  |  |  | Cell division cycle 2 G1 to S and G2 to M |
| CDC20 | AA598776 | -11.13 | 0.69, 0.65 | -5.00 | 0.10, 0.09 |  |  |  |  | CDC20 cell division cycle 20 homolog (S. cerevisiae) |
| CDC25B | AA448659 | -4.16 | 0.47, 0.42 | -2.34 | 0.04, 0.04 |  |  |  |  | Cell division cycle 25B |
| CDC42BPA | N35241 | -1.19 | 0.03, 0.03 | -2.41 | 0.07, 0.07 |  |  |  |  | CDC42 binding protein kinase alpha (DMPK-like) |
| CDC45L | AA700904 | -2.53 | 0.28, 0.25 | -2.40 | 0.82, 0.61 |  |  |  |  | CDC45 cell division cycle 45-like |
| CDH12 | AA418564 | -1.00 | 0.03, 0.03 | -2.10 | 0.31, 0.27 |  |  |  |  | Cadherin 12, type 2 (N-cadherin 2) |
| CDKN3 | AA284072 | -2.56 | 0.60, 0.48 | -2.75 | 0.57, 0.47 |  |  |  |  | Cyclin-dependent kinase inhibitor 3 (CDK2-associated dual specificity phosphatase) |
| CDS1 | R31562 | -2.15 | 0.06, 0.06 | -1.83 | 0.43, 0.35 |  |  |  |  | CDP-diacylglycerol synthase |
| CENPF | AA701455 | -6.80 | 0.36, 0.34 | -3.91 | 0.51, 0.45 |  |  |  |  | CENP-F kinetochore protein |
| CFLAR | AA453766 | 1.58 | 0.26, 0.31 | 2.09 | 0.34, 0.41 |  |  |  |  | CASP8 and FADD-like apoptosis regulator |
| CGI-09 | AA464166 | 3.72 | 0.20, 0.21 | 5.11 | 0.11, 0.12 |  |  |  |  | CGI-09 protein |
| CHAF1B | AA426096 | -4.55 | 0.20, 0.19 | -2.99 | 1.44, 0.97 |  |  |  |  | Chromatin assembly factor 1, subunit B (p60) |
| CHD2 | N49703 | 1.48 | 0.03, 0.03 | 2.38 | 0.07, 0.07 |  |  |  |  | Chromodomain helicase DNA binding protein 2 |
| CHEK1 | N53057 | -4.08 | 0.43, 0.39 | -2.96 | 0.26, 0.24 |  |  |  |  | CHK1 checkpoint homolog (S. pombe) |
| CHKA | H09959 | 4.31 | 0.07, 0.08 | 2.63 | 0.11, 0.12 | 2.11 | 1.94 |  |  | Choline kinase alpha |
| CHN2 | AA521339 | 3.29 | 0.28, 0.31 | 2.22 | 0.32, 0.38 |  |  |  |  | Chimerin (chimaerin) 2 |
| CHPPR | AA459109 | -2.59 | 0.18, 0.16 | -2.33 | 0.16, 0.15 |  |  |  |  | Likely ortholog of chicken chondrocyte protein with a poly-proline region |
| Chr 5q31-33 | R00479 | 2.61 | 0.29, 0.33 | 2.11 | 0.07, 0.07 |  |  |  |  | Chromosome 5q31-33 region |
| CITED2 † | AA115076 | 3.81 | 0.04, 0.04 | 1.04 | 0.10, 0.11 |  |  | 3.57 | 1.83 S | Cbp/p300-interacting transactivator, with Glu/Asp-rich carboxy-terminal domain, 2 |
| CKAP4 | AA598787 | 1.16 | 0.19, 0.23 | 2.22 | 0.14, 0.15 |  |  |  |  | Cytoskeleton-associated protein 4 (p63) |
| CKS2 | AA397813 | -3.09 | 0.31, 0.29 | -2.44 | 0.11, 0.10 |  |  |  |  | CDC28 protein kinase 2 |
| CL640 | N62617 | -3.75 | 0.65, 0.55 | -1.75 | 0.07, 0.07 |  |  |  |  | Hypothetical protein CL640 |
| CLN3 | W37753 | 3.08 | 0.13, 0.13 | 1.75 | 0.09, 0.10 |  |  |  |  | Ceroid-lipofuscinosis neuronal 3 juvenile (Batten Spielmeyer-vogt disease) |
| COCH | R60995 | -2.56 | 0.41, 0.35 | -2.65 | 0.84, 0.64 |  |  |  |  | Coagulation factor C homolog, cochlin (Limulus polyphemus) |
| COPEB | AA055585 | 3.84 | 0.09, 0.10 | 3.90 | 0.08, 0.08 |  |  |  |  | Core promoter element binding protein |
| CORT | N50745 | -2.49 | 0.13, 0.13 | -2.23 | 0.04, 0.04 |  |  |  |  | Cortistatin |
| CRAT | AA621218 | 2.63 | 0.19, 0.21 | 1.45 | 0.09, 0.10 | 1.50 | 2.68 |  |  | Carnitine acetyltransferase |
| CRIP2 | AA873604 | 1.01 | 0.04, 0.04 | -2.23 | 0.17, 0.16 |  |  |  |  | Cysteine-rich protein 1 (intestinal) |
| CRIP2 | AA485427 | 3.23 | 0.25, 0.28 | 1.19 | 0.05, 0.06 |  |  |  |  | Cysteine-rich protein 2 |
| CSE1L | N69204 | -3.21 | 0.19, 0.18 | -2.85 | 0.19, 0.18 |  |  |  |  | CSE1 chromosome segregation 1-like (yeast) |
| CTNNA1 | AA676957 | 1.46 | 0.12, 0.14 | 2.33 | 0.03, 0.03 |  |  |  |  | Catenin (cadherin-associated protein) alpha 1 (102kD) |
| CTNNBL1 | AA487483 | 2.01 | 0.37, 0.46 | 1.04 | 0.08, 0.09 |  |  |  |  | Catenin, beta like 1 |
| CTPS | H09614 | -2.54 | 0.76, 0.59 | -2.21 | 0.08, 0.07 |  |  |  |  | CTP synthetase |
| CUGBP2 | AA700631 | 4.95 | 0.24, 0.25 | 2.31 | 0.10, 0.11 | 2.48 | 2.99 |  |  | CUG triplet repeat, RNA binding protein 2 |
| CUL5 | AA086475 | 3.06 | 0.15, 0.16 | 2.40 | 0.22, 0.24 |  |  |  |  | Cullin 5 |
| CXCL12 | AA447115 | -3.51 | 1.93, 1.24 | -2.96 | 0.09, 0.09 |  |  |  |  | Chemokine (C-X-C motif) ligand 12 (stromal cell-derived factor 1) |
| CYFIP2 | H12044 | 5.94 | 0.28, 0.29 | 1.31 | 0.03, 0.03 |  |  |  |  | Cytoplasmic FMR1 interacting protein 2 |
| CYP27A1 | N66957 | 3.57 | 0.56, 0.67 | 1.59 | 0.07, 0.07 |  |  |  |  | Cytochrome P450 subfamily XXVII (steroid 27-hydroxylase cerebrotendinous xanthomatosis) |
| CYP2B6 | T68287 | 4.42 | 0.59, 0.68 | 2.38 | 0.36, 0.43 |  |  |  |  | Cytochrome P450 subfamily IIB (phenobarbital-inducible) polypeptide 6 |
| CYP51A1 | AA477781 | 2.54 | 0.07, 0.08 | 1.60 | 0.04, 0.04 |  |  |  |  | Cytochrome P450 51 (lanosterol 14-alpha-demethylase) |
| CYR61 | AA777187 | 5.64 | 0.63, 0.71 | 3.73 | 0.18, 0.19 | 2.96 | 1.52 |  |  | Cysteine-rich, angiogenic inducer, 61 |
| DCL-1 | H60460 | -1.41 | 0.18, 0.16 | -2.55 | 0.07, 0.07 |  |  |  |  | Type I transmembrane C-type lectin receptor DCL-1 |
| DCTD | AA448207 | -2.89 | 0.60, 0.50 | -1.88 | 0.36, 0.31 |  |  |  |  | Deoxycytidylate deaminase |
| DDB2 | AA410404 | -2.02 | 0.21, 0.19 | -1.64 | 0.29, 0.24 |  |  |  |  | Damage-specific DNA binding protein 2 (48 kD) |
| DDX11 | AA032090 | -3.10 | 0.11, 0.11 | -2.69 | 0.81, 0.62 |  |  |  |  | DEAD/H (Asp-Glu-Ala-Asp/His) box polypeptide 11 (CHL1-like helicase homolog, S. cerevisiae) |
| DGCR9 | AA629338 | -2.27 | 0.39, 0.33 | -2.54 | 0.04, 0.04 |  |  |  |  | Similar to POM121 membrane glycoprotein-like 1 |
| DHFR | R00884 | -5.98 | 0.62, 0.56 | -6.42 | 1.29, 1.07 |  |  |  |  | Dihydrofolate reductase |
| DHX30 | AA630000 | -1.96 | 0.10, 0.09 | -2.23 | 0.16, 0.15 |  |  |  |  | DEAH (Asp-Glu-Ala-His) box polypeptide 30 |
| DKC1 | AA052960 | -2.22 | 0.06, 0.06 | -1.46 | 0.09, 0.08 |  |  |  |  | Dyskeratosis congenita 1, dyskerin |
| DKFZP434C245 | AA705518 | -2.04 | 0.51, 0.41 | -2.66 | 1.11, 0.78 |  |  |  |  | DKFZP434C245 protein |
| DKFZp547K1113 | AI624998 | 1.63 | 0.20, 0.23 | 2.04 | 0.07, 0.07 |  |  |  |  | Hypothetical protein DKFZp547K1113 |
| DKFZP564B0769 | W92594 | 1.05 | 0.06, 0.07 | 2.21 | 0.08, 0.09 |  |  |  |  | DKFZP564B0769 protein |
| DKFZP564I1171 | H07934 | 5.02 | 0.61, 0.70 | 3.68 | 0.15, 0.16 |  |  |  |  | DKFZP564I1171 protein |
| DKFZP564I122 | T67050 | 2.67 | 0.10, 0.10 | 1.72 | 0.34, 0.42 |  |  |  |  | DKFZP564I122 protein |
| DKFZP586P0123 | AA398306 | 1.53 | 0.02, 0.02 | 2.52 | 0.07, 0.07 |  |  |  |  | DKFZP586P0123 protein |
| DLEU1 | AA425755 | -1.81 | 0.08, 0.08 | -2.37 | 0.01, 0.01 |  |  |  |  | Deleted in lymphocytic leukemia, 1 |
| DMD | AA461118 | 2.08 | 0.42, 0.53 | 1.60 | 0.03, 0.03 |  |  |  |  | Dystrophin (muscular dystrophy Duchenne and Becker types) includes DXS142 DXS164 DXS206 DXS230 DXS239 DXS268 DXS269 DXS270 DXS272 |
| DNAJB1 | AA481758 | 2.04 | 0.09, 0.10 | 1.25 | 0.06, 0.06 |  |  |  |  | DnaJ (Hsp40) homolog, subfamily B, member 1 |
| DOCK9 | N70078 | -1.33 | 0.08, 0.07 | -2.33 | 0.27, 0.24 |  |  |  |  | Dedicator of cytokinesis 9 |
| DPYSL2 | AA487460 | 7.93 | 0.44, 0.47 | 2.51 | 0.26, 0.28 | 3.71 | 1.95 |  |  | Dihydropyrimidinase-like 2 |
| DSCR1 | AA629707 | 3.26 | 0.17, 0.18 | 2.99 | 0.13, 0.14 | 3.64 | 2.73 |  |  | Down syndrome critical region gene 1 |
| DSIPI | AA775091 | 9.58 | 0.19, 0.19 | 4.76 | 0.04, 0.04 | 5.86 | 7.49 |  |  | Delta sleep inducing peptide, immunoreactor |
| DSP | H90899 | 7.05 | 0.36, 0.38 | 2.50 | 0.17, 0.18 |  |  |  |  | Desmoplakin |
| E2F5 | AA455521 | -2.21 | 0.15, 0.14 | -1.73 | 0.03, 0.03 |  |  |  |  | E2F transcription factor 5 p130-binding |
| EBP | N67038 | 3.16 | 0.18, 0.19 | 1.81 | 0.37, 0.47 |  |  |  |  | Phenylalkylamine binding protein |
| ECH1 | AA425861 | 2.25 | 0.16, 0.17 | 1.19 | 0.08, 0.09 |  |  |  |  | Enoyl Coenzyme A hydratase 1, peroxisomal |
| EDN1 | H11003 | 3.25 | 0.01, 0.01 | 1.10 | 0.02, 0.02 |  |  |  |  | Endothelin 1 {alternative products} |
| EFEMP1 | AA875933 | -1.05 | 0.09, 0.08 | -2.83 | 0.35, 0.31 |  |  |  |  | EGF-containing fibulin-like extracellular matrix protein 1 |
| EFHD1 | AI635773 | 7.22 | 0.15, 0.15 | 1.99 | 0.12, 0.13 | 2.42 | 2.02 |  |  | Putative secretory protein hBET3 |
| EFNA1 | AA857015 | 5.05 | 0.25, 0.26 | 5.19 | 0.10, 0.11 |  |  |  |  | Ephrin-A1 |
| EIF2B1 | H63361 | 2.99 | 0.15, 0.16 | 2.57 | 0.16, 0.18 |  |  |  |  | Eukaryotic translation initiation factor 2B (eIF-2B) alpha subunit |
| EIF2S2 | R93621 | -2.13 | 0.07, 0.06 | -1.61 | 0.04, 0.04 |  |  |  |  | Eukaryotic translation initiation factor 2, subunit 2 beta, 38kDa |
| EIF4E | AA194246 | -2.26 | 0.24, 0.22 | -1.20 | 0.07, 0.06 |  |  |  |  | Eukaryotic translation initiation factor 4E |
| EIF5 | AA291494 | -2.13 | 0.18, 0.16 | -2.79 | 0.16, 0.15 |  |  |  |  | eukaryotic translation initiation factor 5 |
| ELF1 | H81220 | 2.02 | 0.45, 0.58 | 2.59 | 0.15, 0.16 |  |  |  |  | E74-like factor 1 (ets domain transcription factor) |
| ELL2 | AA191245 | n.d. | , | 2.41 | 0.40, 0.48 |  |  |  |  | Elongation factor, RNA polymerase II, 2 |
| ENC1 | AA100036 | 1.38 | 0.12, 0.13 | 3.11 | 0.19, 0.21 |  |  |  |  | Ectodermal-neural cortex (with BTB-like domain) |
| ENPP1 | T69450 | 1.09 | 0.04, 0.04 | -3.01 | 0.27, 0.25 |  |  |  |  | Ectonucleotide pyrophosphatase/phosphodiesterase 1 |
| ENSA | AA497038 | -1.04 | 0.04, 0.04 | -2.03 | 0.12, 0.11 |  |  |  |  | Alpha endosulfine |
| EPAS1 | AA680300 | -2.38 | 0.12, 0.11 | -1.71 | 0.03, 0.03 |  |  |  |  | Endothelial PAS domain protein 1 |
| EPAS1 | AI286222 | 3.31 | 0.68, 0.86 | -1.22 | 0.02, 0.02 |  |  |  |  | endothelial PAS domain protein 1 |
| EPHB6 | AA609284 | 2.77 | 0.76, 1.05 | 1.72 | 0.16, 0.18 |  |  |  |  | EPH receptor B6 |
| ERBB2 | AA446928 | 2.17 | 0.16, 0.18 | -1.57 | 0.15, 0.13 |  |  |  |  | V-erb-b2 erythroblastic leukemia viral oncogene homolog 2, neuro/glioblastoma derived oncogene homolog (avian) |
| ERCC3 | H20856 | 2.41 | 0.10, 0.11 | 1.98 | 0.06, 0.06 |  |  |  |  | DNA repair helicase ERCC3 |
| ESR1 | AA291749 | -6.29 | 0.21, 0.20 | -5.80 | 0.43, 0.40 |  |  |  |  | Estrogen receptor |
| ETEA | AA410396 | 2.91 | 0.13, 0.13 | 1.24 | 0.07, 0.07 |  |  |  |  | Expressed in T-cells and eosinophils in atopic dermatitis |
| EZI | AI337462 | 2.09 | 0.21, 0.24 | 1.15 | 0.09, 0.10 |  |  |  |  | Likely ortholog of mouse zinc finger protein EZI |
| FAH | W94120 | 2.76 | 0.20, 0.22 | 1.05 | 0.05, 0.05 |  |  |  |  | Fumarylacetoacetate |
| FANCA | AA644129 | -2.01 | 0.31, 0.27 | -1.18 | 0.02, 0.02 |  |  |  |  | Fanconi anemia complementation group A |
| FARP1 | AA486435 | 1.14 | 0.03, 0.03 | 2.05 | 0.23, 0.26 |  |  |  |  | FERM, RhoGEF (ARHGEF) and pleckstrin domain protein 1 (chondrocyte-derived) |
| FASN | H50323 | 7.55 | 1.62, 2.07 | 1.36 | 0.17, 0.19 |  |  |  |  | Fatty acid synthase |
| FBL | AA663986 | -2.45 | 0.03, 0.03 | -1.35 | 0.01, 0.01 |  |  |  |  | Fibrillarin |
| FCHSD2 | AA626264 | 3.42 | 0.04, 0.04 | 1.69 | 0.06, 0.06 | 2.08 | 1.94 |  |  | FCH and double SH3 domains 2 |
| FDPS | T65790 | 3.66 | 0.09, 0.10 | 4.42 | 0.21, 0.22 |  |  |  |  | Farnesyl diphosphate synthase (farnesyl pyrophosphate synthetase dimethylallyltranstransferase geranyltranstransferase) |
| FDX1 | AA187349 | 2.90 | 0.31, 0.35 | 2.21 | 0.25, 0.29 |  |  |  |  | Adrenodoxin precursor |
| FEN1 | AA620553 | -2.51 | 0.37, 0.32 | -2.52 | 0.10, 0.09 |  |  |  |  | FLAP ENDONUCLEASE-1 |
| FGFR3 | AA419620 | -2.23 | 0.32, 0.28 | -1.93 | 0.40, 0.33 |  |  |  |  | Fibroblast growth factor receptor 3 (achondroplasia thanatophoric dwarfism) |
| FKBP5 | W86653 | 25.86 | 1.38, 1.46 | 6.78 | 0.11, 0.11 | 3.65 | 2.04 |  |  | 54 kDa progesterone receptor-associated immunophilin FKBP54 |
| FLJ10415 | AA490922 | 2.16 | 0.09, 0.10 | 2.28 | 0.15, 0.16 |  |  |  |  | heterogeneous nuclear ribonucleoprotein A1 |
| FLJ22269 | AA463986 | 2.78 | 0.03, 0.03 | 1.11 | 0.05, 0.06 |  |  |  |  | Hypothetical protein FLJ22269 |
| FLJ32949 | AA134696 | 1.06 | 0.11, 0.12 | -2.26 | 0.07, 0.07 |  |  |  |  | Hypothetical protein FLJ32949 |
| FLOT2 | R73545 | -1.09 | 0.23, 0.19 | -2.26 | 0.06, 0.06 |  |  |  |  | Flotillin 2 |
| FOXO1A | AA448277 | 2.67 | 0.13, 0.13 | 2.63 | 0.30, 0.34 | 2.31 | 2.38 |  |  | Forkhead box O1A (rhabdomyosarcoma) |
| FXYD3 | AA126009 | 5.16 | 0.37, 0.39 | -1.17 | 0.02, 0.02 |  |  |  |  | FXYD domain containing ion transport regulator 3 |
| G0S2 | AA931758 | -2.19 | 0.14, 0.13 | -1.84 | 0.03, 0.03 |  |  |  |  | Putative lymphocyte G0/G1 switch gene |
| GAA | AA444009 | 2.31 | 0.17, 0.18 | 2.16 | 0.26, 0.30 |  |  |  |  | Acid alpha-glucosidase |
| GAF1 | AA142980 | 1.27 | 0.03, 0.03 | 2.77 | 0.02, 0.02 | 2.66 | 2.35 |  |  | RAB11 family interacting protein 5 (class I) |
| GALNT1 | AA706987 | 1.62 | 0.08, 0.08 | 2.14 | 0.08, 0.09 |  |  |  |  | UDP-GalNAc:polypeptide N-acetylgalactosaminyltransferase (T1) |
| GATA3 | H72875 | -2.86 | 0.02, 0.02 | -4.17 | 0.11, 0.11 |  |  |  |  | GATA-binding protein 3 |
| GATA6 | H77652 | 2.07 | 0.32, 0.38 | 1.61 | 0.37, 0.48 |  |  |  |  | GATA binding protein 6 |
| GCS1 | AA291490 | -1.95 | 0.11, 0.10 | -2.11 | 0.23, 0.21 |  |  |  |  | Processing a-glucosidase I |
| GCSH | R28294 | -2.86 | 0.39, 0.34 | -1.77 | 0.16, 0.15 |  |  |  |  | Glycine cleavage system protein H (aminomethyl carrier) |
| GDI1 | AA488681 | 1.60 | 0.14, 0.16 | 2.41 | 0.30, 0.34 |  |  |  |  | GDP dissociation inhibitor 1 |
| GGT1 | H72018 | 2.18 | 0.08, 0.09 | -1.40 | 0.05, 0.04 |  |  |  |  | Gamma-glutamyltransferase 1 |
| GHR | AA775738 | 2.43 | 0.06, 0.06 | 1.52 | 0.09, 0.09 |  |  |  |  | Growth hormone receptor |
| GJA1 | AA487623 | 2.88 | 0.07, 0.07 | 2.32 | 0.15, 0.16 |  |  |  |  | Gap junction protein, alpha 1, 43kDa (connexin 43) |
| GJB2 § | AA490466 | 1.00 | 0.00, 0.00 | 1.98 | 0.58, 0.83 |  |  | 1.04 | 2.13 S | Gap junction protein, beta 2, 26kDa (connexin 26) |
| GLO1 | AA136710 | -2.18 | 0.11, 0.11 | -2.56 | 0.07, 0.06 |  |  |  |  | Glyoxalase I |
| GLUD1 | AA017175 | 1.04 | 0.03, 0.03 | -2.46 | 0.13, 0.13 |  |  |  |  | Glutamate dehydrogenase 1 |
| GMPR | AA410375 | 1.14 | 0.05, 0.06 | 2.17 | 0.05, 0.05 |  |  |  |  | Glucose-6-phosphate dehydrogenase |
| GMPS | N59764 | -2.23 | 0.05, 0.05 | -2.48 | 0.23, 0.21 |  |  |  |  | Transcribed locus |
| GNB5 | H08753 | 2.50 | 0.00, 0.00 | 1.96 | 0.26, 0.30 |  |  |  |  | Guanine nucleotide binding protein (G protein), beta 5 |
| GNG10 | AA460286 | -2.05 | 0.05, 0.05 | -2.02 | 0.08, 0.08 |  |  |  |  | Guanine nucleotide binding protein (G protein), gamma 10 |
| GPNMB | AA425450 | 3.25 | 0.14, 0.15 | 1.96 | 0.05, 0.06 |  |  |  |  | Glycoprotein (transmembrane) nmb |
| GPR160 | AA291259 | 4.36 | 0.26, 0.28 | 1.21 | 0.09, 0.10 |  |  |  |  | G protein-coupled receptor 160 |
| GPSM2 | W92011 | 3.49 | 0.25, 0.27 | 1.90 | 0.12, 0.12 |  |  |  |  | G-protein signalling modulator 2 (AGS3-like, C. elegans) |
| GRB2 | AA988203 | -1.50 | 0.14, 0.13 | 2.04 | 0.08, 0.09 |  |  |  |  | growth factor receptor-bound protein 2 |
| GRK4 | N23898 | 1.03 | 0.01, 0.01 | 2.04 | 0.20, 0.22 |  |  |  |  | G PROTEIN-COUPLED RECEPTOR KINASE GRK4 |
| GRK6 | AA291284 | -1.78 | 0.06, 0.06 | -2.06 | 0.03, 0.03 |  |  |  |  | G protein-coupled receptor kinase 6 |
| GRN | AA431832 | 3.19 | 0.19, 0.20 | 1.62 | 0.17, 0.19 |  |  |  |  | Granulin |
| GSTM5 | AA056232 | 2.54 | 0.37, 0.43 | 1.89 | 0.39, 0.50 |  |  |  |  | Glutathione S-transferase M5 |
| GSTO1 | AA441895 | -2.74 | 0.22, 0.20 | -2.01 | 0.06, 0.06 |  |  |  |  | Glutathione S-transferase omega 1 |
| GSTT2 | AA490208 | -1.40 | 0.09, 0.08 | -2.30 | 0.11, 0.10 |  |  |  |  | Glutathione S-transferase theta 2 |
| GTSE1 | AA449474 | 3.30 | 0.15, 0.16 | 1.79 | 0.19, 0.21 |  |  |  |  | G-2 and S-phase expressed 1 |
| H2AFX | H95392 | -4.59 | 0.10, 0.09 | -4.23 | 0.11, 0.10 |  |  |  |  | H2A histone family, member X |
| H41 | H99695 | -3.03 | 0.10, 0.10 | -1.69 | 0.04, 0.04 |  |  |  |  | Hypothetical protein H41 |
| HADHSC | R02373 | -1.20 | 0.08, 0.07 | -2.00 | 0.15, 0.14 |  |  |  |  | Enyol-coA: hydratase 3-hydroxyacyl-coA dehydrogenase |
| HARS | H61209 | -2.32 | 0.37, 0.32 | -1.67 | 0.08, 0.08 |  |  |  |  | Histidyl-tRNA synthetase |
| HAT1 | AA625662 | -1.95 | 0.15, 0.14 | -2.06 | 0.13, 0.12 |  |  |  |  | Histone acetyltransferase 1 |
| HCG8 | AA701554 | 2.66 | 0.30, 0.34 | 2.80 | 0.23, 0.25 |  |  |  |  | HLA complex group 8 |
| HHL | N63623 | -1.02 | 0.00, 0.00 | 2.08 | 0.11, 0.12 |  |  |  |  | RAB GTPase activating protein 1-like |
| HIF1A | AA598526 | 1.48 | 0.03, 0.03 | 2.33 | 0.09, 0.09 | 2.08 | 1.56 |  |  | Hypoxia-inducible factor 1, alpha subunit (basic helix-loop-helix transcription factor) |
| HIST1H1C | T66815 | 2.08 | 0.06, 0.06 | 1.09 | 0.02, 0.02 |  |  |  |  | Histone 1, H1c |
| HIST1H2AC | AA452933 | 2.51 | 0.13, 0.14 | 2.31 | 0.24, 0.27 |  |  |  |  | Histone 1, H2ac |
| HIST1H4F | AA868008 | -3.08 | 1.63, 1.07 | -3.95 | 0.57, 0.50 |  |  |  |  | H4/g gene for H4 histone |
| HIST2H2AA | AA047260 | -2.01 | 0.03, 0.03 | -1.35 | 0.10, 0.09 |  |  |  |  | Histone 2, H2aa |
| HIST2H2BE | AA456298 | 5.43 | 0.28, 0.29 | 3.46 | 0.11, 0.12 |  |  |  |  | Histone 2, H2be |
| HLA-DMA | H42728 | 2.21 | 0.04, 0.04 | 1.25 | 0.06, 0.06 |  |  |  |  | Major histocompatibility complex, class II, DM alpha |
| HMGB1 | AA683085 | -3.01 | 0.61, 0.50 | -2.75 | 0.51, 0.43 |  |  |  |  | High-mobility group (nonhistone chromosomal) protein 1 |
| HNRNPF | AA490991 | -1.62 | 0.05, 0.05 | -2.71 | 0.51, 0.43 |  |  |  |  | Data not found |
| HNRPAB | W72693 | -1.68 | 0.10, 0.10 | -3.18 | 0.49, 0.43 |  |  |  |  | Heterogeneous nuclear ribonucleoprotein A/B |
| HNRPH1 | W96058 | -2.02 | 0.05, 0.05 | -1.08 | 0.02, 0.02 |  |  |  |  | Heterogeneous nuclear ribonucleoprotein H1 (H) |
| HPRT1 | N47312 | -3.48 | 0.54, 0.47 | -2.42 | 0.13, 0.12 |  |  |  |  | Hypoxanthine phosphoribosyltransferase 1 (Lesch-Nyhan syndrome) |
| HPS1 | AA418683 | 2.22 | 0.23, 0.25 | 1.36 | 0.04, 0.04 |  |  |  |  | Hermansky-Pudlak syndrome 1 |
| HRASLS3 | AA476438 | -1.92 | 0.13, 0.13 | -3.56 | 0.21, 0.20 |  |  |  |  | H.sapiens rat HREV107-like protein |
| HSD11B2 | W95082 | 9.99 | 0.26, 0.26 | 6.72 | 0.51, 0.55 |  |  |  |  | Hydroxysteroid (11-beta) dehydrogenase 2 |
| HSHIN1 | R78541 | 1.31 | 0.06, 0.06 | 2.56 | 0.21, 0.23 |  |  |  |  | HIV-1 induced protein HIN-1 |
| HSPA8 | AA629567 | -1.53 | 0.05, 0.05 | -2.21 | 0.83, 0.60 |  |  |  |  | Heat shock 70kDa protein 8 |
| HSU79275 | N39071 | 1.48 | 0.10, 0.11 | 2.48 | 0.09, 0.09 |  |  |  |  | Hypothetical protein HSU79275 |
| IARS | AA410636 | -1.99 | 0.06, 0.06 | -2.02 | 0.28, 0.24 |  |  |  |  | Isoleucine-tRNA synthetase |
| ICAM1 | R77293 | -1.04 | 0.10, 0.09 | 2.01 | 0.47, 0.61 |  |  |  |  | Intercellular adhesion molecule 1 (CD54) human rhinovirus receptor |
| ID3 | AA482119 | 2.99 | 0.11, 0.11 | -1.95 | 0.05, 0.05 |  |  |  |  | Inhibitor of DNA binding 3 dominant negative helix-loop-helix protein |
| IDH3A | AA464139 | -2.29 | 0.22, 0.20 | -1.54 | 0.17, 0.16 |  |  |  |  | Isocitrate dehydrogenase 3 (NAD+) alpha |
| IER2 | AA496359 | 2.00 | 0.02, 0.02 | 1.24 | 0.08, 0.08 | -1.83 | -2.24 |  |  | Immediate early response 2 |
| IFI27 | AA157813 | -1.12 | 0.03, 0.03 | -2.11 | 0.02, 0.02 |  |  |  |  | Interferon, alpha-inducible protein 27 |
| IFI35 | AA827287 | -1.57 | 0.06, 0.06 | -4.49 | 0.17, 0.16 |  |  |  |  | Interferon-induced protein 35 |
| IFNGR2 | AA449440 | -2.27 | 0.02, 0.02 | -1.72 | 0.18, 0.17 |  |  |  |  | Interferon gamma receptor 2 (interferon gamma transducer 1) |
| IGF2 | H59614 | -1.58 | 0.51, 0.38 | -2.12 | 0.09, 0.08 |  |  |  |  | Insulin-like growth factor 2 (somatomedin A) |
| IGF2R | T62547 | -7.32 | 0.70, 0.64 | -4.78 | 0.91, 0.77 |  |  |  |  | Insulin-like growth factor 2 receptor |
| IGFBP5 | T52830 | -9.20 | 1.23, 1.09 | -4.66 | 0.15, 0.14 |  |  |  |  | Insulin-like growth factor binding protein 5 |
| IGHM | H73590 | -3.14 | 0.07, 0.07 | -3.59 | 0.24, 0.23 |  |  |  |  | Immunoglobulin mu |
| ILVBL | AA451741 | -2.07 | 0.10, 0.09 | -1.24 | 0.11, 0.10 |  |  |  |  | IlvB (bacterial acetolactate synthase)-like |
| INPP5F | N73551 | -2.44 | 0.47, 0.39 | -2.76 | 0.74, 0.58 |  |  |  |  | Inositol polyphosphate-5-phosphatase F |
| ISG20 | AA479795 | 2.55 | 0.10, 0.10 | 1.69 | 0.35, 0.44 |  |  |  |  | Interferon stimulated gene 20kDa |
| ITGAE | AA425451 | 1.36 | 0.01, 0.01 | 4.81 | 0.16, 0.16 |  |  |  |  | Integrin alpha E (antigen CD103 human mucosal lymphocyte antigen 1; alpha polypeptide) |
| ITGB1BP1 | AA457038 | -2.01 | 0.17, 0.16 | -1.54 | 0.09, 0.08 |  |  |  |  | Integrin beta 1 binding protein 1 |
| ITGB4 | AA485668 | 2.44 | 0.13, 0.13 | -1.32 | 0.05, 0.05 |  |  |  |  | Integrin beta-4 subunit |
| ITPK1 | AA463931 | -2.54 | 0.10, 0.10 | -2.19 | 0.44, 0.36 |  |  |  |  | Inositol 1,3,4-triphosphate 5/6 kinase |
| JUN | W96155 | 1.86 | 0.16, 0.17 | 2.32 | 0.07, 0.07 |  |  |  |  | c-jun proto oncogene |
| JUNB | N94468 | 3.60 | 0.21, 0.23 | 1.92 | 0.07, 0.07 |  |  |  |  | Jun B proto-oncogene |
| KATNA1 | AA609740 | 1.83 | 0.29, 0.34 | 2.21 | 0.11, 0.12 |  |  |  |  | Katanin p60 (ATPase-containing) subunit A 1 |
| KCNB1 | AA069770 | 2.22 | 0.55, 0.74 | 1.52 | 0.21, 0.25 |  |  |  |  | Potassium voltage-gated channel, Shab-related subfamily, member 1 |
| KCNN4 | AA443903 | 2.94 | 0.25, 0.27 | 2.76 | 0.40, 0.46 |  |  |  |  | Potassium intermediate/small conductance calcium-activated channel, subfamily N, member 4 |
| KIAA0056 | AA430545 | -3.71 | 0.67, 0.57 | -2.13 | 0.35, 0.30 |  |  |  |  | KIAA0056 protein |
| KIAA0103 | AA181333 | 1.82 | 0.03, 0.03 | -3.16 | 0.26, 0.24 |  |  |  |  | KIAA0103 gene product |
| KIAA0146 | AA401448 | 1.83 | 0.10, 0.10 | 2.68 | 0.48, 0.59 |  |  |  |  | KIAA0146 protein |
| KIAA0166 | AA157787 | 1.20 | 0.03, 0.03 | 2.55 | 0.41, 0.49 |  |  |  |  | KIAA0166 gene product |
| KIAA0218 | H15567 | 2.25 | 0.13, 0.14 | 2.08 | 0.13, 0.14 |  |  |  |  | KIAA0218 gene product |
| KIAA0232 | AA406589 | 2.98 | 0.10, 0.10 | 2.79 | 0.11, 0.12 | 2.07 | 1.76 |  |  | KIAA0232 gene product |
| KIAA0241 | AA971406 | 2.05 | 0.17, 0.19 | 1.84 | 0.03, 0.03 |  |  |  |  | KIAA0241 protein |
| KIAA0247 | N63733 | 3.69 | 0.08, 0.08 | 2.45 | 0.11, 0.12 |  |  |  |  | KIAA0247 gene product |
| KIAA0286 | T81399 | -3.54 | 3.08, 1.65 | -3.30 | 0.37, 0.34 |  |  |  |  | KIAA0286 protein |
| KIAA0476 | W81135 | 1.46 | 0.09, 0.10 | 2.69 | 0.12, 0.12 |  |  |  |  | KIAA0476 gene product |
| KIAA0592 | AA970720 | 2.10 | 0.28, 0.32 | 2.34 | 0.15, 0.16 |  |  |  |  | KIAA0592 protein |
| KIAA0628 | N56973 | 1.46 | 0.04, 0.04 | 2.51 | 0.04, 0.04 |  |  |  |  | KIAA0628 gene product |
| KIAA0644 | AI630806 | -1.32 | 0.04, 0.04 | -2.53 | 0.48, 0.40 |  |  |  |  | KIAA0644 gene product |
| KIAA0650 | AA706967 | 4.62 | 0.07, 0.07 | 3.50 | 0.06, 0.06 | 2.14 | 1.39 |  |  | KIAA0650 protein |
| KIAA0663 | N57577 | 1.26 | 0.00, 0.00 | 3.10 | 0.85, 1.16 |  |  |  |  | KIAA0663 gene product |
| KIAA0674 | AA404988 | 2.55 | 0.10, 0.10 | -1.02 | 0.12, 0.11 |  |  |  |  | KIAA0674 protein |
| KIAA0685 | N49009 | 4.22 | 0.75, 0.92 | 1.53 | 0.29, 0.36 |  |  |  |  | KIAA0685 gene product |
| KIAA0795 | AA418936 | 1.39 | 0.09, 0.09 | 2.22 | 0.01, 0.01 |  |  |  |  | Kelch-like 18 (Drosophila) |
| KIAA0970 | R36431 | 2.08 | 0.10, 0.11 | 2.18 | 0.13, 0.14 |  |  |  |  | KIAA0970 protein |
| KIAA1049 | AA424509 | -2.49 | 0.44, 0.38 | -1.94 | 0.10, 0.09 |  |  |  |  | KIAA1049 protein |
| KIAA1099 | W93405 | 1.42 | 0.08, 0.08 | 2.02 | 0.01, 0.01 |  |  |  |  | KIAA1099 protein |
| KIAA1522 | AA457115 | 3.71 | 0.54, 0.63 | 1.59 | 0.14, 0.16 | 3.00 | 3.32 |  |  | KIAA1522 protein |
| KIF11 | AA504625 | -5.43 | 0.35, 0.33 | -5.64 | 0.21, 0.20 |  |  |  |  | Kinesin family member 11 |
| KIF23 | AA454098 | -4.22 | 0.56, 0.49 | -3.81 | 0.18, 0.17 |  |  |  |  | Kinesin family member 23 |
| KIFAP3 | AI090702 | 2.84 | 0.23, 0.25 | 1.40 | 0.07, 0.07 |  |  |  |  | Kinesin-associated protein 3 |
| KIFC1 | N69491 | -2.25 | 0.07, 0.07 | -1.63 | 0.04, 0.04 |  |  |  |  | Kinesin family member C1 |
| KLF4 | H45668 | 3.76 | 0.43, 0.49 | 5.68 | 0.14, 0.14 | 4.34 | 4.18 |  |  | Kruppel-like zinc finger protein (EZF) |
| KPNA2 | AA676460 | -3.29 | 0.10, 0.10 | -2.66 | 0.14, 0.13 |  |  |  |  | RAG (recombination activating gene) cohort 1 |
| KRT18 § | AA664179 | -1.04 | 0.06, 0.06 | -2.70 | 0.07, 0.07 |  |  | -1.01 | -2.13 S | Keratin 18 |
| KRT5 | AA160507 | 7.99 | 1.15, 1.34 | 4.60 | 1.71, 2.72 |  |  |  |  | Keratin 5 |
| KRT8 | AA598517 | -1.85 | 0.42, 0.34 | -2.54 | 0.07, 0.07 |  |  |  |  | Keratin 8 |
| KYNU | H87471 | 1.55 | 0.10, 0.11 | -3.69 | 0.60, 0.51 |  |  |  |  | Kynureninase (L-kynurenine hydrolase) |
| LAD1 | T97710 | 1.28 | 0.08, 0.08 | 2.05 | 0.16, 0.17 |  |  |  |  | Ladinin 1 |
| LBR | AA099136 | -2.11 | 0.57, 0.45 | -1.82 | 0.26, 0.23 |  |  |  |  | Lamin B receptor |
| LDHA | AA497029 | -1.17 | 0.15, 0.13 | -2.09 | 0.27, 0.24 |  |  |  |  | Lactate dehydrogenase A |
| LGALS3 | AA630328 | 2.62 | 0.13, 0.14 | 2.03 | 0.11, 0.12 |  |  |  |  | Lectin, galactoside-binding, soluble, 3 (galectin 3) |
| LITAF | AA625666 | -1.56 | 0.10, 0.09 | -2.22 | 0.10, 0.10 |  |  |  |  | Lipopolysaccharide-induced TNF factor |
| LMAN1 | AA022558 | -2.12 | 0.32, 0.28 | -1.57 | 0.06, 0.06 |  |  |  |  | Lectin, mannose-binding, 1 |
| LMCD1 | R63811 | -1.38 | 0.25, 0.22 | -2.24 | 0.71, 0.54 |  |  |  |  | LIM and cysteine-rich domains 1 |
| LMNB2 | AA457025 | -4.29 | 0.12, 0.12 | -1.77 | 0.15, 0.14 |  |  |  |  | Lamin B2 |
| LMO2 § | AA464544 | 1.99 | 0.29, 0.34 | 5.89 | 0.28, 0.29 |  |  | 1.61S  15.97R | 4.26S  64.58R | Rhombotin 2 |
| LMTK2 | AA775275 | 3.49 | 1.12, 1.64 | 2.65 | 0.11, 0.11 |  |  |  |  | Lemur tyrosine kinase 2 |
| LOC153561 | AA028921 | -1.19 | 0.11, 0.10 | -2.29 | 0.37, 0.32 |  |  |  |  | Beta glucuronidase pseudogene |
| LOC153561 | AA669750 | 5.12 | 0.55, 0.62 | 3.11 | 0.64, 0.80 |  |  |  |  | Retrotransposon |
| LOC51059 | H16974 | 1.03 | 0.09, 0.10 | -2.10 | 0.04, 0.04 |  |  |  |  | Hypothetical protein LOC51059 |
| LOC90410 | N62562 | -2.71 | 0.14, 0.14 | -3.28 | 0.04, 0.04 |  |  |  |  | Intraflagellar transport protein IFT20 |
| LRP8 | W80637 | -3.11 | 1.33, 0.93 | -1.56 | 0.03, 0.03 |  |  |  |  | Apolipoprotein E receptor 2 |
| LRRC15 | AA449321 | 2.67 | 0.13, 0.14 | 1.06 | 0.03, 0.03 |  |  |  |  | Leucine rich repeat containing 15 |
| LY6E | AA865464 | -4.70 | 1.43, 1.10 | -2.69 | 1.60, 1.00 |  |  |  |  | Lymphocyte antigen 6 complex, locus E |
| MAD2L1 | AA481076 | -2.17 | 0.64, 0.49 | -2.25 | 0.19, 0.18 |  |  |  |  | MAD2 mitotic arrest deficient-like 1 (yeast) |
| MAD2L1BP | H67988 | 1.79 | 0.12, 0.13 | 2.44 | 0.04, 0.04 |  |  |  |  | MAD2L1 binding protein |
| MAN1A1 | T91261 | 2.10 | 0.16, 0.17 | 2.09 | 0.04, 0.04 |  |  |  |  | Mannosidase, alpha, class 1A, member 1 |
| MAPK8 | T94169 | -1.39 | 0.17, 0.15 | -2.20 | 0.12, 0.12 |  |  |  |  | Mitogen-activated protein kinase 8 |
| MAPK8IP3 | AA489245 | -2.31 | 0.27, 0.24 | -1.31 | 0.16, 0.14 |  |  |  |  | Mitogen-activated protein kinase 8 interacting protein 3 |
| MAPK9 | AA157286 | -2.14 | 0.05, 0.05 | -2.12 | 0.11, 0.11 |  |  |  |  | Mitogen-activated protein kinase 9 |
| MARCH-VI | H78349 | 3.86 | 0.05, 0.05 | 1.97 | 0.57, 0.80 |  |  |  |  | Membrane-associated RING-CH protein VI |
| MB | AA176581 | 3.44 | 0.34, 0.38 | 1.22 | 0.14, 0.16 |  |  |  |  | Myoglobin |
| MBNL2 | N36402 | 3.55 | 0.42, 0.48 | 3.47 | 0.39, 0.44 |  |  |  |  | C3H-type zinc finger protein; similar to D. melanogaster muscleblind B protein |
| MCLC | AA406603 | 1.72 | 0.07, 0.07 | 2.21 | 0.09, 0.10 |  |  |  |  | G-protein signalling modulator 2 (AGS3-like, C. elegans) |
| MCM3 | AA456608 | -3.65 | 0.73, 0.61 | -4.41 | 0.33, 0.31 |  |  |  |  | Minichromosome maintenance deficient (S. cerevisiae) 3 |
| MCM4 | AA488610 | -3.68 | 0.11, 0.10 | -3.02 | 0.82, 0.64 |  |  |  |  | MCM4 minichromosome maintenance deficient 4 (S. cerevisiae) |
| MCM5 | AA285155 | -3.65 | 0.53, 0.46 | -3.13 | 0.32, 0.29 |  |  |  |  | MCM5 minichromosome maintenance deficient 5, cell division cycle 46 (S. cerevisiae) |
| MEF2D | AA035144 | 1.66 | 0.12, 0.13 | 2.66 | 0.21, 0.23 |  |  |  |  | MADS box transcription enhancer factor 2, polypeptide D (myocyte enhancer factor 2D) |
| MERTK | AA436564 | 1.19 | 0.09, 0.09 | 2.01 | 0.16, 0.17 |  |  |  |  | Cellular proto-oncogene (c-mer) |
| MFAP5 | AA056013 | -1.15 | 0.05, 0.04 | 2.59 | 0.19, 0.20 |  |  |  |  | Microfibrillar associated protein 5 |
| MGC10433 | AA429281 | -2.47 | 0.39, 0.34 | -2.84 | 0.40, 0.35 |  |  |  |  | Hypothetical protein MGC10433 |
| MGC40489 | AA459399 | -2.74 | 0.29, 0.26 | -2.17 | 0.17, 0.16 |  |  |  |  | KIAA0356. Similar to pleckstrin homology domain containing, family M (with RUN domain) member 1; adapter protein 162 |
| MGP | AA155913 | -2.10 | 0.57, 0.45 | -4.14 | 0.68, 0.59 |  |  |  |  | Matrix Gla protein |
| MICA | N71782 | -2.12 | 0.21, 0.19 | -1.31 | 0.02, 0.02 |  |  |  |  | MHC class I polypeptide-related sequence A |
| MMP14 | N33214 | -11.15 | 1.62, 1.41 | -4.44 | 0.52, 0.46 |  |  |  |  | Membrane-type matrix metalloproteinase 1 |
| MPHOSPH1 | AA282936 | -2.70 | 0.54, 0.45 | -2.60 | 0.08, 0.08 |  |  |  |  | M-phase phosphoprotein 1 |
| MPHOSPH10 | AA504113 | 1.44 | 0.17, 0.19 | 2.04 | 0.11, 0.12 |  |  |  |  | M phase phosphoprotein 10 |
| MPZL1 | AA464423 | n.d. | , | 5.38 | 0.89, 1.06 | 3.98 | 3.80 |  |  | Myelin protein zero-like 1 |
| MR1 | AA873499 | 1.23 | 0.03, 0.03 | 2.71 | 0.10, 0.11 |  |  |  |  | Major histocompatibility complex, class I-related |
| MST1R | AA173454 | -1.25 | 0.05, 0.05 | -3.14 | 0.14, 0.14 |  |  |  |  | Macrophage stimulating 1 receptor (c-met-related tyrosine kinase) |
| MSX2 | AA195636 | 2.40 | 0.13, 0.14 | 1.22 | 0.04, 0.04 |  |  |  |  | Msh (Drosophila) homeo box homolog 2 |
| MTF1 | AA448256 | 1.45 | 0.09, 0.10 | 2.30 | 0.02, 0.02 |  |  |  |  | Metal-regulatory transcription factor |
| MTHFD1 | AA633577 | -1.78 | 0.43, 0.34 | -2.57 | 0.10, 0.09 |  |  |  |  | Methylenetetrahydrofolate dehydrogenase (NADP+ dependent), methenyltetrahydrofolate cyclohydrolase, formyltetrahydrofolate synthetase |
| MTHFD2 | AA480995 | -3.89 | 0.38, 0.35 | -4.57 | 0.17, 0.16 |  |  |  |  | Methylene tetrahydrofolate dehydrogenase (NAD+ dependent), methenyltetrahydrofolate cyclohydrolase |
| MUC1 | AA488073 | 2.47 | 0.20, 0.22 | 2.24 | 0.13, 0.14 |  |  |  |  | Mucin 1 transmembrane |
| MX1 | AA457042 | -1.43 | 0.04, 0.04 | -3.64 | 1.93, 1.26 |  |  |  |  | Myxovirus (influenza virus) resistance 1, interferon-inducible protein p78 (mouse) |
| MYB | N49284 | -3.10 | 1.01, 0.76 | -3.59 | 0.16, 0.15 |  |  |  |  | V-myb myeloblastosis viral oncogene homolog (avian) |
| MYBL2 | AA457034 | -5.47 | 0.66, 0.59 | -3.42 | 0.85, 0.68 |  |  |  |  | V-myb avian myeloblastosis viral oncogene homolog-like 2 |
| MYC | AA464600 | -2.22 | 0.13, 0.12 | -2.89 | 0.15, 0.14 |  |  |  |  | V-myc avian myelocytomatosis viral oncogene homolog |
| MYD88 | H40681 | 2.05 | 0.10, 0.11 | 1.48 | 0.04, 0.04 |  |  |  |  | Myeloid differentiation primary response gene (88) |
| MYL9 | AA877166 | -1.28 | 0.07, 0.06 | -2.05 | 0.10, 0.10 |  |  |  |  | Myosin, light polypeptide 9, regulatory |
| MYO1B | AA047778 | 2.24 | 0.09, 0.09 | 2.19 | 0.06, 0.06 |  |  |  |  | Myosin IB |
| n.a. | PM0008B | -4.80 | 0.19, 0.19 | -3.11 | 0.18, 0.17 |  |  |  |  | a-myb |
| n.a. | AA088258 | -2.78 | 0.15, 0.14 | -2.11 | 0.07, 0.07 |  |  |  |  | Immuno-reactive with anti-PTH polyclonal antibodies |
| n.a. § | AA256386 | 2.53 | 0.73, 1.03 | 1.91 | 0.38, 0.47 |  |  | 4.48S  2.49R | 1.53S  -1.34R | Novel human gene mapping to chomosome 13 similar to rat RhoGAP |
| n.a. | AA485442 | -1.79 | 0.04, 0.04 | -2.34 | 0.15, 0.14 |  |  |  |  | btk gene region involved in a-gamma-globulinemia |
| n.a. | H79047 | -2.38 | 0.09, 0.09 | -1.76 | 0.11, 0.11 |  |  |  |  | Insulin-like growth factor binding protein 2 (36kD) |
| n.a. | W49667 | 2.70 | 0.11, 0.12 | 2.10 | 0.13, 0.13 |  |  |  |  | Putative fatty acid desaturase MLD |
| n.a. | PM0021 | 1.13 | 0.02, 0.02 | 2.31 | 0.15, 0.16 |  |  |  |  | mBIML |
| n.a. | PM0009B | n.d. | , | 23.01 | 1.44, 1.54 |  |  |  |  | pDMDR3-5 |
| NAB2 | AA434391 | -1.84 | 0.36, 0.30 | -2.06 | 0.05, 0.04 |  |  |  |  | NGFI-A binding protein 2 (EGR1 binding protein 2) |
| NALP1 | T89383 | -2.24 | 0.28, 0.25 | 1.12 | 0.08, 0.08 |  |  |  |  | NACHT, leucine rich repeat and PYD containing 1 |
| NASP | AA644128 | -3.79 | 0.86, 0.70 | -2.59 | 0.36, 0.31 |  |  |  |  | Nuclear autoantigenic sperm protein (histone-binding) |
| NCAM2 | AA709271 | -2.22 | 0.47, 0.39 | -2.56 | 0.46, 0.39 |  |  |  |  | Neural cell adhesion protein |
| NCL | AA476294 | 3.10 | 0.30, 0.33 | -1.00 | 0.02, 0.02 |  |  |  |  | Nucleolin |
| NCOA3 | AA156793 | 2.23 | 0.21, 0.23 | 1.24 | 0.07, 0.08 |  |  |  |  | Nuclear receptor coactivator 3 |
| NDRG1 § | AA486403 | 62.94 | 5.04, 5.48 | 7.06 | 1.09, 1.28 | 3.94 | 5.08 | 7.01S  239.2R | 1.56S  49.59R | N-myc downstream regulated gene 1 |
| NDRG4 | AA454215 | 4.25 | 0.33, 0.36 | 6.98 | 0.52, 0.56 |  |  |  |  | NDRG family member 4 |
| NEDD4 | AA442095 | 2.10 | 0.18, 0.20 | 3.40 | 0.30, 0.33 |  |  |  |  | Neural precursor cell expressed, developmentally down-regulated 4 |
| NEK2 | W93379 | -4.49 | 0.14, 0.14 | -4.00 | 0.74, 0.63 |  |  |  |  | NIMA (never in mitosis gene a)-related kinase 2 |
| NELL2 | H45300 | 2.61 | 0.05, 0.05 | 3.14 | 0.10, 0.10 |  |  |  |  | NEL-like 2 (chicken) |
| NEO1 | AA447658 | 3.72 | 0.39, 0.44 | 2.01 | 0.35, 0.42 |  |  |  |  | Neogenin homolog 1 (chicken) |
| NFKB1 | AA451716 | 1.06 | 0.02, 0.02 | 2.04 | 0.12, 0.13 |  |  |  |  | Nuclear factor of kappa light polypeptide gene enhancer in B-cells 1 (p105) |
| NFKBIA | W56300 | 4.46 | 0.10, 0.10 | 3.29 | 0.09, 0.10 | 2.06 | 1.96 |  |  | Nuclear factor of kappa light polypeptide gene enhancer in B-cells inhibitor, alpha |
| NFX1 | N59790 | 1.16 | 0.10, 0.11 | 2.03 | 0.06, 0.06 |  |  |  |  | Nuclear transcription factor, X-box binding 1 |
| NK4 | AA458965 | 3.32 | 0.28, 0.31 | 4.15 | 1.34, 1.98 |  |  |  |  | Natural killer cell transcript 4 |
| NOL5A | AA894577 | -3.01 | 0.05, 0.05 | -2.02 | 0.06, 0.06 |  |  |  |  | Nucleolar protein 5A (56kDa with KKE/D repeat) |
| NOTCH4 | AA983822 | 2.47 | 0.13, 0.14 | 1.67 | 0.10, 0.11 |  |  |  |  | Notch (Drosophila) homolog 4 |
| NP | AA430382 | -3.63 | 0.14, 0.13 | -3.11 | 0.15, 0.14 |  |  |  |  | Nucleoside phosphorylase |
| NPC1 | AA634267 | 3.67 | 0.10, 0.10 | 3.39 | 0.27, 0.29 |  |  |  |  | Niemann-Pick disease, type C1 |
| NPEPPS | R32450 | -2.33 | 0.06, 0.06 | -1.40 | 0.07, 0.06 |  |  |  |  | Aminopeptidase |
| NPFF | AA460688 | 3.44 | 0.21, 0.23 | -1.63 | 0.02, 0.02 |  |  |  |  | Neuropeptide FF-amide peptide precursor |
| NPM1 | AA669758 | -2.24 | 0.32, 0.28 | -1.29 | 0.37, 0.29 |  |  |  |  | Nucleophosmin (nucleolar phosphoprotein B23 numatrin) |
| NPY1R § | R43187 | -1.70 | 0.06, 0.05 | -1.17 | 0.43, 0.34 |  |  | -2.92S  -6.04R | 1.04S  1.34R | Neuropeptide Y receptor Y1 |
| NR1D1 | AA454168 | n.d. |  | 2.51 | 0.20, 0.22 |  |  |  |  | Nuclear receptor subfamily 1, group D, member 1 |
| NT5C2 | AA404619 | -2.02 | 0.10, 0.10 | -1.18 | 0.05, 0.05 |  |  |  |  | 5' nucleotidase (CD73) |
| NUDT1 | AA443998 | -2.39 | 0.16, 0.15 | -1.64 | 0.10, 0.09 |  |  |  |  | Nudix (nucleoside diphosphate linked moiety X)-type motif 1 |
| NUP160 | R18849 | -2.16 | 0.04, 0.04 | -1.62 | 0.08, 0.07 |  |  |  |  | Nucleoporin 160kDa |
| OAS1 | AA146773 | 2.35 | 0.47, 0.59 | -1.26 | 0.02, 0.02 |  |  |  |  | (2'-5') oligoadenylate synthetase E |
| OAT | AA446820 | -1.77 | 0.05, 0.05 | -2.03 | 0.11, 0.10 |  |  |  |  | Ornithine aminotransferase (gyrate atrophy) |
| OAZ2 | T67029 | 1.38 | 0.03, 0.03 | 3.59 | 0.18, 0.19 |  |  |  |  | Ornithine decarboxylase antizyme 2 |
| ODC1 | AA461467 | -1.05 | 0.00, 0.00 | 2.12 | 0.13, 0.13 |  |  |  |  | Ornithine decarboxylase 1 |
| OIP5 | H54393 | -1.13 | 0.05, 0.05 | -2.07 | 0.10, 0.10 |  |  |  |  | Opa-interacting protein 5 |
| OPA1 | AA130235 | n.d. | , | 2.95 | 0.16, 0.17 |  |  |  |  | Optic atrophy 1 (autosomal dominant) |
| OVGP1 | AA863449 | 2.07 | 0.10, 0.10 | -1.02 | 0.02, 0.02 |  |  |  |  | Oviductal glycoprotein 1, 120kDa (mucin 9, oviductin) |
| OXR1 | AA447499 | 1.98 | 0.10, 0.10 | 2.66 | 0.21, 0.22 |  |  |  |  | Oxidation resistance 1 |
| P2RY5 | N90783 | 2.75 | 0.42, 0.49 | 1.19 | 0.00, 0.00 |  |  |  |  | Purinergic receptor P2Y, G-protein coupled, 5 |
| P2RY6 | AA778919 | -2.48 | 0.06, 0.06 | -3.84 | 3.19, 1.74 | 1.00 | 2.42 |  |  | Pyrimidinergic receptor P2Y, G-protein coupled, 6 |
| PA2G4 | AA488332 | -2.09 | 0.08, 0.08 | -1.62 | 0.02, 0.02 |  |  |  |  | Proliferation-associated 2G4, 38kDa |
| PAICS | N33274 | -2.64 | 0.28, 0.25 | -2.91 | 0.50, 0.43 |  |  |  |  | Phosphoribosylaminoimidazole carboxylase, phosphoribosylaminoimidazole succinocarboxamide synthetase |
| PAI-RBP1 | H53658 | 2.63 | 0.03, 0.03 | -1.05 | 0.03, 0.03 |  |  |  |  | PAI-1 mRNA-binding protein |
| PANK3 | H03954 | 3.03 | 0.45, 0.53 | -1.60 | 0.02, 0.02 |  |  |  |  | Pantothenate kinase 3 |
| PBEF1 | AA489629 | 2.85 | 0.20, 0.22 | 1.37 | 0.19, 0.22 |  |  |  |  | Pre-B-cell colony enhancing factor 1 |
| PBX3 | AA778198 | -1.73 | 0.05, 0.04 | -2.05 | 0.02, 0.02 |  |  |  |  | Pre-B-cell leukemia transcription factor 3 |
| PC4 | AA099534 | -2.04 | 0.10, 0.09 | -1.46 | 0.07, 0.07 |  |  |  |  | Activated RNA polymerase II transcription cofactor 4 |
| PCBP2 | AA431440 | -1.91 | 0.29, 0.25 | -2.06 | 0.10, 0.10 |  |  |  |  | Poly(rC) binding protein 2 |
| PCDHA2 | AI651536 | 2.41 | 0.17, 0.18 | 1.18 | 0.01, 0.01 |  |  |  |  | Protocadherin alpha 6 |
| PCDHGC3 § | R89615 | -1.01 | 0.06, 0.06 | -2.17 | 0.01, 0.01 |  |  | 2.79S  2.43R | -1.35S  -1.40R | Protocadherin gamma subfamily C, 3 |
| PCNA | AA450265 | -5.13 | 0.09, 0.09 | -5.74 | 0.26, 0.25 |  |  |  |  | Proliferating cell nuclear antigen |
| PDCD5 | AA156940 | -2.51 | 0.26, 0.24 | -1.43 | 0.00, 0.00 |  |  |  |  | Programmed cell death 5 |
| PDE6D | AA417919 | -2.06 | 0.47, 0.38 | -2.21 | 0.10, 0.09 |  |  |  |  | Phosphodiesterase 6D, cGMP-specific, rod, delta |
| PDGFA | AA701502 | 1.17 | 0.03, 0.03 | 3.11 | 0.23, 0.25 |  |  |  |  | Platelet-derived growth factor alpha polypeptide |
| PDHA1 | T65758 | 1.34 | 0.03, 0.03 | 2.96 | 0.17, 0.18 |  |  |  |  | Pyruvate dehydrogenase (lipoamide) alpha 1 |
| PDHB | AA521401 | -2.02 | 0.16, 0.14 | -1.25 | 0.03, 0.03 |  |  |  |  | Pyruvate dehydrogenase (lipoamide) beta |
| PDK4 | AA169469 | 2.81 | 0.10, 0.10 | 2.11 | 0.36, 0.43 |  |  |  |  | Pyruvate dehydrogenase kinase isoenzyme 4 |
| PEG10 | H51765 | -14.30 | 2.06, 1.80 | -11.42 | 2.86, 2.29 |  |  |  |  | Paternally expressed 10 |
| PEN2 | AA626310 | -2.48 | 0.32, 0.29 | -4.41 | 1.05, 0.85 |  |  |  |  | Protein F25965 |
| PFKP | AA608558 | -2.39 | 0.06, 0.05 | -1.34 | 0.02, 0.02 |  |  |  |  | Phosphofructokinase platelet |
| PFN2 | AA040703 | -1.16 | 0.27, 0.22 | 2.30 | 0.31, 0.36 |  |  |  |  | Profilin 2 |
| PGRMC2 | AA047567 | 3.88 | 0.06, 0.07 | 1.41 | 0.05, 0.05 |  |  |  |  | Progesterone receptor membrane component 2 |
| PHF19 | AI337373 | -3.66 | 0.10, 0.09 | -1.88 | 0.01, 0.01 |  |  |  |  | PHD finger protein 19 |
| PHF5A | AA424527 | 2.43 | 0.23, 0.25 | -1.04 | 0.03, 0.03 |  |  |  |  | PHD finger protein 5A |
| PIGQ | AA157261 | 7.74 | 0.33, 0.35 | 1.61 | 0.12, 0.13 |  |  |  |  | Phosphatidylinositol glycan, class Q |
| PIK3R1 | R45961 | 2.21 | 0.04, 0.04 | 1.68 | 0.15, 0.16 |  |  |  |  | Phosphoinositide-3-kinase, regulatory subunit 1 (p85 alpha) |
| PIM2 § | AA863383 | -1.05 | 0.04, 0.04 | 6.58 | 0.42, 0.44 | 3.20 | 4.65 | 1.73S  1.71R | 3.31S  28.25R | Pim-2 oncogene |
| PITPN | R89808 | 2.09 | 0.12, 0.13 | 1.20 | 0.01, 0.01 |  |  |  |  | Phosphatidylinositol transfer protein, alpha |
| PKMYT1 | AA478066 | -5.41 | 0.12, 0.12 | -3.34 | 0.96, 0.74 |  |  |  |  | Membrane-associated tyrosine- and threonine-specific cdc2-inhibitory kinase |
| PLK1 | AA629262 | -4.96 | 0.97, 0.81 | -4.58 | 0.97, 0.80 |  |  |  |  | Polo-like kinase 1 (Drosophila) |
| PLK4 | AA732873 | -2.24 | 0.18, 0.17 | -1.87 | 0.39, 0.32 |  |  |  |  | Polo-like kinase 4 (Drosophila) |
| PLOD2 | AA136707 | -3.92 | 0.51, 0.45 | -3.54 | 0.33, 0.30 |  |  |  |  | Procollagen-lysine, 2-oxoglutarate 5-dioxygenase (lysine hydroxylase) 2 |
| PLP2 | AA464528 | -1.51 | 0.22, 0.19 | -2.98 | 0.13, 0.13 |  |  |  |  | Proteolipid protein 2 (colonic epithelium-enriched) |
| PLTP | AA916327 | 1.90 | 0.03, 0.03 | 2.09 | 0.06, 0.07 |  |  |  |  | Protective protein for beta-galactosidase (galactosialidosis) |
| PMVK | H09819 | 1.58 | 0.07, 0.07 | 2.04 | 0.02, 0.02 |  |  |  |  | Phosphomevalonate kinase |
| PNRC1 | AA669637 | 2.06 | 0.32, 0.38 | 2.14 | 0.35, 0.41 |  |  |  |  | Proline-rich nuclear receptor coactivator 1 |
| POLA | AA707650 | -2.12 | 0.18, 0.17 | -1.89 | 0.14, 0.13 |  |  |  |  | Polymerase (DNA directed), alpha |
| POLD2 | AA428377 | -2.40 | 0.03, 0.03 | -1.87 | 0.13, 0.12 |  |  |  |  | Polymerase (DNA directed), delta 2, regulatory subunit 50kDa |
| POLR3E | R43271 | 1.89 | 0.16, 0.18 | 2.08 | 0.17, 0.19 |  |  |  |  | Polymerase (RNA) III (DNA directed) polypeptide E (80kD) |
| PP21 | AA478480 | 2.12 | 0.12, 0.13 | -1.42 | 0.05, 0.05 |  |  |  |  | pp21 |
| PPIF | AA401291 | 1.24 | 0.03, 0.03 | 2.34 | 0.08, 0.08 |  |  |  |  | Peptidylprolyl isomerase F (cyclophilin F) |
| PPP1R2 | AA428335 | -1.02 | 0.06, 0.05 | 2.62 | 0.09, 0.09 |  |  |  |  | Protein phosphatase inhibitor 2 |
| PPP2CB | AA490473 | 2.89 | 0.13, 0.14 | 2.79 | 0.06, 0.06 |  |  |  |  | Protein phosphatase 2 (formerly 2A), catalytic subunit, beta isoform |
| PRKAB1 | AA432271 | -1.10 | 0.04, 0.04 | 2.85 | 0.45, 0.54 |  |  |  |  | Protein kinase, AMP-activated, beta 1 non-catalytic subunit |
| PRKAB2 | N78582 | 4.26 | 0.81, 0.99 | 3.13 | 0.09, 0.09 | 2.23 | 1.94 |  |  | Protein kinase, AMP-activated, beta 2 non-catalytic subunit |
| PRKCBP1 | AA480906 | 3.60 | 0.14, 0.15 | 1.55 | 0.10, 0.11 |  |  |  |  | Protein kinase C binding protein 1 |
| PRKDC | R27615 | -2.19 | 0.11, 0.11 | -1.96 | 0.14, 0.13 |  |  |  |  | Protein kinase, DNA-activated, catalytic polypeptide |
| PRKR | AA010079 | -1.08 | 0.06, 0.05 | -2.06 | 0.33, 0.29 |  |  |  |  | Protein kinase interferon-inducible double stranded RNA dependent |
| PRKWNK1 | AA677083 | 1.96 | 0.03, 0.04 | 2.06 | 0.07, 0.07 |  |  |  |  | Protein kinase, lysine deficient 1 |
| PRPS2 | AA151486 | -5.06 | 0.55, 0.50 | -6.31 | 0.08, 0.08 |  |  |  |  | Phosphoribosyl pyrophosphate synthetase 2 |
| PSG9 † | R65993 | 4.02 | 0.18, 0.19 | -1.06 | 0.01, 0.01 |  |  | 1.20 | 2.14S | pregnancy specific beta-1-glycoprotein 9 |
| PSIP1 | AA227982 | -1.37 | 0.18, 0.16 | -2.60 | 0.25, 0.23 |  |  |  |  | PC4 and SFRS1 interacting protein 1 |
| PSMB8 | AA181300 | 1.19 | 0.11, 0.13 | 2.44 | 0.15, 0.16 |  |  |  |  | Proteasome (prosome, macropain) subunit, beta type, 8 (large multifunctional protease 7) |
| PSME1 | T47815 | -1.53 | 0.14, 0.13 | -2.25 | 0.13, 0.12 |  |  |  |  | Proteasome (prosome, macropain) activator subunit 1 (PA28 alpha) |
| PTMA | AA442991 | -1.77 | 0.25, 0.22 | -2.19 | 0.32, 0.28 |  |  |  |  | Prothymosin alpha |
| PTPN21 | H03504 | -1.40 | 0.06, 0.06 | -2.01 | 0.07, 0.06 |  |  |  |  | Protein-tyrosine-phosphatase D1 |
| PUM1 | T56948 | 1.25 | 0.02, 0.02 | 3.50 | 0.13, 0.14 |  |  |  |  | PRO0611 protein |
| PVRL3 | R62780 | -1.24 | 0.00, 0.00 | -2.67 | 0.02, 0.02 |  |  |  |  | Poliovirus receptor-related 3 |
| PYGB | AA922705 | 2.83 | 0.23, 0.25 | 2.09 | 0.08, 0.08 |  |  |  |  | Glycogen phosphorylase B (brain form) |
| QSCN6 | AA464152 | 4.59 | 1.32, 1.85 | 6.70 | 0.39, 0.41 | 3.18 | 4.39 |  |  | Quiescin Q6 |
| RAB31 | T96082 | -3.10 | 0.44, 0.39 | -2.49 | 0.08, 0.08 |  |  |  |  | RAB31, member RAS oncogene family |
| RABL4 | AA676431 | -1.57 | 0.08, 0.08 | -2.13 | 0.04, 0.04 |  |  |  |  | RAB, member of RAS oncogene family-like 4 |
| RAD51 | AA873056 | -1.91 | 0.26, 0.23 | -2.01 | 0.33, 0.28 |  |  |  |  | RAD51 homolog (RecA homolog, E. coli) (S. cerevisiae) |
| RALGDS | H19201 | 2.65 | 0.40, 0.47 | 1.45 | 0.05, 0.05 |  |  |  |  | Ral guanine nucleotide dissociation stimulator |
| RANGAP1 | AA485734 | -1.71 | 0.03, 0.03 | -2.20 | 0.03, 0.03 |  |  |  |  | RanGTPase activating protein 1 |
| RBBP3 | AA424950 | -2.14 | 0.11, 0.10 | -2.04 | 0.13, 0.13 |  |  |  |  | Retinoblastoma binding protein 3 |
| RBL2 | N50554 | -1.03 | 0.02, 0.02 | 2.69 | 0.09, 0.09 |  |  |  |  | Retinoblastoma-like 2 (p130) |
| RBM4 | AA454656 | 2.01 | 0.12, 0.13 | 1.70 | 0.05, 0.05 |  |  |  |  | RNA binding motif protein 4 |
| RDX | AA479781 | -1.86 | 0.16, 0.15 | -2.15 | 0.16, 0.15 |  |  |  |  | Radixin |
| RELB | AA258001 | -1.14 | 0.05, 0.05 | 2.37 | 0.07, 0.07 |  |  |  |  | V-rel reticuloendotheliosis viral oncogene homolog B, nuclear factor of kappa light polypeptide gene enhancer in B-cells 3 (avian) |
| RFC4 | N93924 | -3.52 | 0.40, 0.36 | -3.23 | 0.20, 0.19 |  |  |  |  | Replication factor C (activator 1) 4, 37kDa |
| RGS19IP1 | AA434159 | 3.70 | 0.10, 0.10 | 3.40 | 0.11, 0.11 |  |  |  |  | Regulator of G-protein signalling 19 interacting protein 1 |
| RHOB | AA495790 | 2.58 | 0.17, 0.19 | 2.09 | 0.05, 0.05 | 3.89 | 4.25 |  |  | Ras homolog gene family, member B |
| RHOBTB3 | AA599094 | 2.76 | 0.71, 0.96 | 2.34 | 0.05, 0.05 |  |  |  |  | Rho-related BTB domain containing 3 |
| RIT1 | AA027840 | 2.41 | 0.15, 0.16 | 2.23 | 0.04, 0.04 |  |  |  |  | RIT protein |
| RNF5 | AA402960 | 2.04 | 0.06, 0.07 | 1.15 | 0.07, 0.08 |  |  |  |  | Ring finger protein 5 |
| RPA2 | R39861 | -2.24 | 0.10, 0.09 | -1.77 | 0.03, 0.03 |  |  |  |  | Replication protein A2, 32kDa |
| RPIP8 | AA683172 | 3.84 | 0.70, 0.86 | 3.22 | 0.73, 0.94 |  |  |  |  | RaP2 interacting protein 8 |
| RPS6KA1 § | AA452574 | 1.23 | 0.13, 0.15 | 2.69 | 0.15, 0.15 |  |  | 1.65S  1.97R | 8.47S  5.70R | Ribosomal protein S6 kinase 90kD polypeptide 1 |
| RRAGB | N73499 | -2.04 | 0.27, 0.24 | -1.32 | 0.14, 0.13 |  |  |  |  | RagB |
| RRAS2 | R21416 | 1.39 | 0.07, 0.08 | 2.33 | 0.32, 0.36 |  |  |  |  | Related RAS viral (r-ras) oncogene homolog 2 |
| RRM1 | AA633549 | -4.23 | 0.18, 0.17 | -5.81 | 0.34, 0.32 |  |  |  |  | Ribonucleotide reductase M1 polypeptide |
| RRM2 | AA187351 | -6.10 | 0.18, 0.17 | -7.29 | 0.11, 0.11 |  |  |  |  | Ribonucleotide reductase M2 polypeptide |
| S100A1 | AA425934 | -2.11 | 0.08, 0.08 | -1.81 | 0.05, 0.05 |  |  |  |  | S100 calcium binding protein A1 |
| S100A8 § | AA086471 | 16.33 | 2.60, 3.09 | 2.12 | 0.31, 0.37 |  |  | 8.38S  245.6R | 2.60S  17.5R | S100 calcium-binding protein A8 (calgranulin A) |
| S100P † | R32848 | 58.15 | 1.26, 1.29 | 11.50 | 2.74, 3.60 | 4.93 | 7.93 | 5.29S  81.04R | 6.31S  82.43R | S-100P protein |
| SAH | W01011 | 1.80 | 0.02, 0.02 | 2.38 | 0.30, 0.35 |  |  |  |  | SA hypertension-associated homolog (rat) |
| SAT | AA011215 | 1.98 | 0.18, 0.20 | 2.02 | 0.08, 0.08 |  |  |  |  | Spermidine/spermine N1-acetyltransferase |
| SCARB1 | AA443899 | -2.10 | 0.02, 0.02 | -3.83 | 0.11, 0.11 |  |  |  |  | Encoding CLA-1 mRNA |
| SCD | AA457700 | 2.24 | 0.13, 0.14 | 1.77 | 0.16, 0.18 |  |  |  |  | Cytochrome B561 |
| SCOC | AA961361 | 2.22 | 0.14, 0.15 | -1.35 | 0.04, 0.04 |  |  |  |  | Short coiled-coil protein |
| SDC1 | AA074511 | -1.17 | 0.11, 0.10 | -2.23 | 0.19, 0.18 |  |  |  |  | Syndecan 1 |
| SDC2 | AA045058 | -2.20 | 0.57, 0.45 | -1.85 | 0.54, 0.42 |  |  |  |  | Syndecan 2 (heparan sulfate proteoglycan 1 cell surface-associated fibroglycan) |
| SEMA3C | AA042990 | -3.40 | 0.21, 0.19 | -3.73 | 0.33, 0.30 |  |  |  |  | Sema domain, immunoglobulin domain (Ig), short basic domain, secreted, (semaphorin) 3C |
| SEPP1 | AA070226 | 9.68 | 0.17, 0.17 | 1.70 | 0.03, 0.03 |  |  |  |  | Selenoprotein P |
| SERPINA3 | W86431 | 3.03 | 0.22, 0.24 | 1.97 | 0.00, 0.00 |  |  |  |  | Serine (or cysteine) proteinase inhibitor, clade A (alpha-1 antiproteinase, antitrypsin), member 5 |
| SERPINA6 | H90764 | -76.52 | 4.51, 4.26 | -21.45 | 3.89, 3.29 |  |  |  |  | Corticosteroid binding globulin |
| SET | AA608548 | -2.22 | 0.04, 0.04 | -1.77 | 0.10, 0.09 |  |  |  |  | SET translocation (myeloid leukemia-associated) |
| SFRS2 | AA454585 | -2.66 | 0.06, 0.06 | -2.18 | 0.11, 0.10 |  |  |  |  | Splicing factor arginine/serine-rich 2 |
| SFRS3 | AA598400 | -2.18 | 0.18, 0.17 | -1.63 | 0.07, 0.07 |  |  |  |  | Splicing factor, arginine/serine-rich 3 |
| SGCE | AA432066 | -1.62 | 0.12, 0.11 | -2.37 | 0.14, 0.13 |  |  |  |  | Sarcoglycan, epsilon |
| SGK | AA486082 | 8.74 | 1.97, 2.54 | 3.50 | 0.96, 1.31 |  |  |  |  | Serum/glucocorticoid regulated kinase |
| SHC1 | T50498 | 1.31 | 0.06, 0.06 | 3.60 | 0.30, 0.33 |  |  |  |  | V-ski avian sarcoma viral oncogene homolog |
| SHMT2 | AA620477 | -2.19 | 0.07, 0.07 | -2.33 | 0.07, 0.06 |  |  |  |  | Serine hydroxymethyltransferase 2 (mitochondrial) |
| SIAH1 | T72030 | -2.49 | 0.22, 0.20 | -1.46 | 0.05, 0.05 |  |  |  |  | hSIAH1 |
| SIAT1 | AA598652 | 3.03 | 0.39, 0.44 | -1.36 | 0.21, 0.18 |  |  |  |  | Sialyltransferase 1 (beta-galactoside alpha-2 6-sialytransferase) |
| SIAT4C | AA453813 | 8.04 | 0.11, 0.11 | 5.59 | 0.45, 0.49 | 3.02 | 2.58 |  |  | Gal-beta(1-3/1-4)GlcNAc alpha-2.3-sialyltransferase |
| SIAT7B | AA497051 | -1.07 | 0.10, 0.09 | -2.43 | 0.08, 0.08 |  |  |  |  | Sialyltransferase 7 ((alpha-N-acetylneuraminyl-2,3-beta-galactosyl-1,3)-N-acetyl galactosaminide alpha-2,6-sialyltransferase) B |
| SKIP | AA476625 | 1.67 | 0.04, 0.04 | 2.50 | 0.12, 0.13 |  |  |  |  | Skeletal muscle and kidney enriched inositol phosphatase |
| SLBP | AA629558 | -2.38 | 0.24, 0.22 | -1.24 | 0.03, 0.03 |  |  |  |  | Stem-loop (histone) binding protein |
| SLC12A2 | AA262080 | -2.25 | 0.40, 0.34 | -2.24 | 0.28, 0.25 |  |  |  |  | Solute carrier family 12 (sodium/potassium/chloride transporters), member 2 |
| SLC12A5 | AA167670 | -1.70 | 0.05, 0.05 | -2.09 | 0.10, 0.09 |  |  |  |  | Solute carrier family 12, (potassium-chloride transporter) member 5 |
| SLC1A5 | T70031 | -2.84 | 0.13, 0.13 | -2.84 | 0.04, 0.04 |  |  |  |  | Solute carrier family 1 (neutral amino acid transporter), member 5 |
| SLC29A1 | AA129135 | -3.06 | 0.13, 0.12 | -5.82 | 0.54, 0.49 |  |  |  |  | Solute carrier family 29A5 |
| SLC35A1 | AA460679 | -1.64 | 0.19, 0.17 | -2.18 | 0.26, 0.23 |  |  |  |  | Solute carrier family 35 (CMP-sialic acid transporter), member A1 |
| SLC43A3 | N76193 | 1.53 | 0.06, 0.06 | 3.33 | 0.13, 0.13 |  |  |  |  | Solute carrier family 43, member 3 |
| SLC7A5 | AA419177 | -2.09 | 0.09, 0.09 | -1.37 | 0.06, 0.06 |  |  |  |  | Solute carrier family 7 (cationic amino acid transporter, y+ system), member 5 |
| SLC9A3R1 | AA425299 | -1.18 | 0.08, 0.08 | -2.53 | 0.15, 0.14 |  |  |  |  | Solute carrier family 9 (sodium/hydrogen exchanger), isoform 3 regulator 1 |
| SLPI | AA683520 | 5.53 | 0.73, 0.84 | 6.25 | 2.32, 3.70 |  |  |  |  | Antileukoproteinase 1 precursor |
| SMARCA3 | AA459407 | -2.40 | 0.07, 0.07 | -2.61 | 0.08, 0.08 |  |  |  |  | SWI/SNF related, matrix associated, actin dependent regulator of chromatin, subfamily a, member 3 |
| SNCG | AA443638 | -1.47 | 0.07, 0.07 | -2.12 | 0.06, 0.06 |  |  |  |  | Synuclein, gamma (breast cancer-specific protein 1) |
| SNRPA1 | AA122272 | -2.58 | 0.10, 0.10 | -1.34 | 0.03, 0.03 |  |  |  |  | Small nuclear ribonucleoprotein polypeptide A' |
| SNRPB | AA599116 | -2.02 | 0.13, 0.12 | -1.48 | 0.04, 0.04 |  |  |  |  | Small nuclear ribonucleoprotein polypeptides B and B1 |
| SNRPD1 | H16255 | -2.31 | 0.20, 0.18 | -1.31 | 0.04, 0.04 |  |  |  |  | Small nuclear ribonucleoprotein sm D1 |
| SNRPF | AA668189 | -2.61 | 0.10, 0.09 | -1.25 | 0.01, 0.01 |  |  |  |  | Sm protein F |
| SNRPG | AA133577 | -2.04 | 0.11, 0.10 | -1.40 | 0.04, 0.04 |  |  |  |  | Sm protein G |
| SNRPN | T54926 | 2.16 | 0.07, 0.08 | 1.72 | 0.12, 0.13 |  |  |  |  | Small nuclear ribonucleoprotein polypeptide N |
| SNX13 | R33831 | -3.09 | 1.26, 0.90 | -2.23 | 0.78, 0.58 |  |  |  |  | Sorting nexin 13 |
| SOD2 | AA488084 | 2.13 | 0.18, 0.20 | 5.23 | 0.07, 0.07 | 2.62 | 2.37 |  |  | Superoxide dismutase 2 mitochondrial |
| SOD3 | AA454160 | 5.89 | 0.85, 1.00 | 1.70 | 0.13, 0.14 |  |  |  |  | Superoxide dismutase 3 extracellular |
| SORD | AA700604 | -1.26 | 0.08, 0.07 | -3.03 | 0.27, 0.25 |  |  |  |  | Sorbitol dehydrogenase |
| SOS1 | H64325 | 2.10 | 0.28, 0.33 | 2.36 | 0.11, 0.11 |  |  |  |  | Son of sevenless homolog 1 (Drosophila) |
| SOX4 | AA453420 | 7.29 | 0.95, 1.09 | 2.76 | 0.77, 1.07 | 2.53 | 2.32 |  |  | SRY (sex determining region Y)-box 4 |
| SSB1 | T97925 | -2.03 | 0.43, 0.36 | -1.35 | 0.05, 0.05 |  |  |  |  | SPRY domain-containing SOCS box protein SSB-1 |
| SSBP2 | H61464 | 3.02 | 0.60, 0.75 | 3.75 | 0.85, 1.09 |  |  |  |  | Single-stranded DNA binding protein 2 |
| STAT1 | AA488075 | -1.43 | 0.11, 0.10 | -2.86 | 0.52, 0.44 |  |  |  |  | Signal transducer and activator of transcription 1, 91kDa |
| STAT3 | AA399410 | 2.59 | 0.12, 0.12 | 1.45 | 0.06, 0.07 |  |  |  |  | Signal transducer and activator of transcription 3 (acute-phase response factor) |
| STK6 | R19158 | -5.91 | 0.33, 0.31 | -3.25 | 0.41, 0.36 |  |  |  |  | Serine/threonine kinase 6 |
| STMN1 | AA873060 | -2.05 | 0.07, 0.06 | -2.08 | 0.08, 0.08 |  |  |  |  | Stathmin 1/oncoprotein 18 |
| STOM | R62817 | 2.07 | 0.33, 0.39 | 1.35 | 0.06, 0.06 |  |  |  |  | Stomatin |
| STXBP3 | R20770 | 2.00 | 0.10, 0.10 | 1.95 | 0.05, 0.05 |  |  |  |  | Syntaxin binding protein 3 |
| TBL1X | AA486067 | 2.36 | 0.25, 0.28 | 1.34 | 0.09, 0.10 |  |  |  |  | Transducin (beta)-like 1X-linked |
| TCOF1 | AA457050 | -2.23 | 0.06, 0.06 | -1.42 | 0.01, 0.01 |  |  |  |  | Treacher Collins syndrome susceptibility protein |
| TCP1 | R46821 | -2.06 | 0.17, 0.16 | -2.56 | 0.52, 0.43 |  |  |  |  | Acetyl-Coenzyme A acetyltransferase 2 (acetoacetyl Coenzyme A thiolase) |
| TDE1 | H23255 | 1.80 | 0.14, 0.15 | 2.16 | 0.10, 0.10 |  |  |  |  | Tumor differentially expressed 1 |
| TEAD4 | W74602 | -4.13 | 0.71, 0.60 | -2.47 | 0.09, 0.08 |  |  |  |  | TEA domain family member 4 |
| TFAM | AA449118 | -2.84 | 0.11, 0.10 | -1.62 | 0.12, 0.11 |  |  |  |  | Transcription factor 6-like 1 (mitochondrial transcription factor 1-like) |
| TFE3 | AA403035 | 2.06 | 0.20, 0.22 | 2.24 | 0.27, 0.30 |  |  |  |  | Transcription factor binding to IGHM enhancer 3 |
| TFRC | AA487593 | -2.10 | 0.05, 0.05 | -2.39 | 0.36, 0.31 |  |  |  |  | Transferrin receptor (p90 CD71) |
| TGFB1I4 | AA664389 | 6.04 | 0.29, 0.30 | 3.07 | 0.08, 0.08 |  |  |  |  | Transforming growth factor beta 1 induced transcript 4 |
| TGFB3 | AA040617 | -1.80 | 0.23, 0.21 | -3.55 | 0.23, 0.21 | -2.10 | -2.04 |  |  | Transforming growth factor beta 3 |
| TGFBR1 | N64801 | -1.89 | 0.45, 0.37 | -2.17 | 0.19, 0.17 |  |  |  |  | Transforming growth factor, beta receptor I (activin A receptor type II-like kinase, 53kDa) |
| TGIF | R83270 | 2.48 | 0.10, 0.10 | 2.66 | 0.07, 0.07 |  |  |  |  | TGFB-induced factor (TALE family homeobox) |
| THAP11 | AA521422 | 2.03 | 0.15, 0.16 | -1.05 | 0.03, 0.03 |  |  |  |  | THAP domain containing 11 |
| THBS3 | AA774044 | 3.09 | 0.36, 0.41 | 2.06 | 0.51, 0.68 |  |  |  |  | Thrombospondin 3 |
| THRA | T66180 | 1.78 | 0.08, 0.09 | 2.75 | 0.23, 0.25 | 3.01 | 3.86 |  |  | Thyroid hormone receptor, alpha (erythroblastic leukemia viral (v-erb-a) oncogene homolog, avian) |
| TJP2 | W31391 | 2.14 | 0.04, 0.04 | 1.20 | 0.04, 0.04 |  |  |  |  | Tight junction protein 2 (zona occludens 2) |
| TK1 | AA778098 | -5.02 | 0.29, 0.27 | -3.49 | 0.24, 0.23 |  |  |  |  | Thymidine kinase 1 soluble |
| TLE3 | AA496630 | 1.55 | 0.08, 0.08 | 2.50 | 0.17, 0.18 |  |  |  |  | Transducin-like enhancer of split 3 (E(sp1) homolog, Drosophila) |
| TLOC1 | AA450205 | -3.13 | 0.79, 0.63 | -2.95 | 0.17, 0.16 |  |  |  |  | Translocation protein 1 |
| TLR4 | AI371874 | 1.68 | 0.01, 0.01 | 2.22 | 0.03, 0.03 |  |  |  |  | Toll-like receptor 4 |
| TM7SF1 | AA520979 | 2.49 | 0.13, 0.14 | 2.52 | 0.02, 0.02 |  |  |  |  | Homo sapiens putative seven pass transmembrane protein (TM7SF1) mRNA complete cds |
| TMEM4 | AA482224 | 2.37 | 0.17, 0.18 | -2.09 | 0.94, 0.65 |  |  |  |  | Transmembrane protein 4 |
| TNFAIP3 | AA476272 | 4.37 | 0.33, 0.35 | 12.68 | 0.41, 0.42 |  |  |  |  | Tumor necrosis factor, alpha-induced protein 3 |
| TNFRSF21 | AA490494 | 2.53 | 0.52, 0.65 | 3.50 | 0.42, 0.47 |  |  |  |  | Tumor necrosis factor receptor superfamily, member 21 |
| TNFRSF6 | AA293571 | 2.51 | 0.20, 0.22 | 1.82 | 0.01, 0.01 |  |  |  |  | Tumor necrosis factor receptor superfamily, member 6 |
| TNFSF10 | H54629 | 2.12 | 0.12, 0.13 | -2.11 | 0.73, 0.54 | -1.93 | -2.95 |  |  | Tumor necrosis factor (ligand) superfamily, member 10 |
| TP53BP2 | N48652 | n.d. | , | 2.98 | 0.69, 0.90 |  |  |  |  | Tumor protein p53 binding protein, 2 |
| TPM1 | W58092 | 1.87 | 0.40, 0.52 | 2.58 | 0.24, 0.26 |  |  |  |  | Tropomyosin alpha chain (skeletal muscle) |
| TRA1 | AA598758 | -4.87 | 0.27, 0.26 | -2.53 | 0.97, 0.70 |  |  |  |  | Tumor rejection antigen (gp96) 1 |
| TRIP13 | AA630784 | -2.35 | 0.09, 0.08 | -1.77 | 0.01, 0.01 |  |  |  |  | Thyroid hormone receptor interactor 13 |
| TROAP | H94949 | -2.09 | 0.18, 0.17 | -1.52 | 0.04, 0.04 |  |  |  |  | Trophinin associated protein (tastin) |
| TSN | AA460927 | -3.20 | 0.51, 0.44 | -2.72 | 0.02, 0.02 |  |  |  |  | Translin |
| TUBA2 | AA426374 | -2.68 | 0.19, 0.18 | -2.69 | 0.06, 0.06 |  |  |  |  | Tubulin, alpha 2 |
| TYRP1 | AA424996 | -3.03 | 1.37, 0.94 | -3.23 | 0.13, 0.12 |  |  |  |  | 5 6-dihydroxyindole-2-carboxylic acid oxidase precursor |
| UBE2C | AA430504 | -7.11 | 0.59, 0.54 | -6.06 | 0.04, 0.04 |  |  |  |  | Ubiquitin-conjugating enzyme E2C |
| UBE2L6 | AA292074 | -1.11 | 0.06, 0.06 | -2.68 | 0.14, 0.14 |  |  |  |  | Ubiquitin-conjugating enzyme E2L 6 |
| UBE2S | AA464729 | -2.69 | 0.21, 0.19 | -2.28 | 0.09, 0.09 |  |  |  |  | Ubiquitin carrier protein |
| UGP2 | AA046067 | 2.26 | 0.21, 0.23 | 1.68 | 0.06, 0.06 |  |  |  |  | UDP-glucose pyrophosphorylase 2 |
| UNG2 | AA425900 | -6.54 | 0.13, 0.13 | -7.17 | 0.58, 0.54 | -2.59 | -2.72 |  |  | Uracil-DNA glycosylase 2 |
| UQCRH | R11698 | 1.93 | 0.21, 0.23 | 2.75 | 0.00, 0.00 |  |  |  |  | Ubiquinol-cytochrome c reductase hinge protein |
| USP32 | AA437374 | -2.06 | 0.22, 0.20 | -1.71 | 0.05, 0.05 |  |  |  |  | Ubiquitin specific protease 32 |
| USP46 | AA599072 | 2.20 | 0.20, 0.22 | 2.69 | 0.45, 0.54 | 2.11 | 3.00 |  |  | Ubiquitin specific protease 46 |
| VASP | AA410429 | 1.36 | 0.03, 0.03 | 2.19 | 0.02, 0.02 |  |  |  |  | Vasodilator-stimulated phosphoprotein |
| VCL § | AA486728 | 1.01 | 0.03, 0.03 | 3.93 | 0.28, 0.30 | 2.32 | 3.13 | 1.25S  1.36R | 3.28S  9.13R | Vinculin |
| VDR | AA485226 | 2.40 | 0.23, 0.26 | 1.56 | 0.08, 0.08 | 2.09 | 2.23 |  |  | Vitamin D (1 25- dihydroxyvitamin D3) receptor |
| VEGFB | AA630120 | -1.70 | 0.07, 0.06 | -3.12 | 0.67, 0.55 |  |  |  |  | Vascular endothelial growth factor B |
| VIPR1 | H73241 | 3.95 | 0.28, 0.30 | -1.67 | 0.09, 0.09 |  |  |  |  | Vasoactive intestinal peptide receptor 1 |
| VMD2 | H10947 | 2.30 | 0.05, 0.05 | 2.13 | 0.66, 0.95 |  |  |  |  | Vitelliform macular dystrophy (Best disease, bestrophin) |
| WDR45L | AA412266 | 2.15 | 0.14, 0.15 | 1.57 | 0.06, 0.06 |  |  |  |  | WDR45-like |
| WDR7 | AA677076 | -1.30 | 0.00, 0.00 | -2.02 | 0.60, 0.46 |  |  |  |  | WD repeat domain 7 |
| WEE1 | AA678396 | -2.28 | 0.08, 0.07 | -1.93 | 0.17, 0.16 |  |  |  |  | WEE1 homolog (S. pombe) |
| WT1 † | AA130187 | -1.72 | 0.37, 0.30 | -3.85 | 0.07, 0.07 | -2.67 | -1.49 | -8.71S  -9.42R | -7.20S  -9.16R | Wilms tumor 1 |
| YPEL1 | AA400188 | 1.07 | 0.06, 0.06 | 2.90 | 0.21, 0.23 |  |  |  |  | Yippee-like 1 (Drosophila) |
| YWHAH | N69107 | -2.17 | 0.34, 0.30 | -2.12 | 0.12, 0.11 |  |  |  |  | Tyrosine 3-monooxygenase/tryptophan 5-monooxygenase activation protein eta polypeptide |
| YWHAQ | AA633997 | 1.51 | 0.08, 0.09 | 2.62 | 0.15, 0.16 |  |  |  |  | 14-3-3 PROTEIN TAU |
| ZC35F11 | AA284109 | 2.18 | 0.06, 0.06 | 1.62 | 0.06, 0.07 |  |  |  |  | Full length insert cDNA clone ZC35F11 |
| ZFP36L1 | AA424743 | 1.17 | 0.11, 0.12 | 2.02 | 0.06, 0.06 |  |  |  |  | ERF-1 mRNA 3' end |
| ZFYVE26 | W02580 | n.d. |  | 3.11 | 0.07, 0.07 |  |  |  |  | Zinc finger, FYVE domain containing 26 |

Footnotes: n.a.– not available. n.d. – not detected. § - differential gene regulation validated by RT-PCR quantitation. † - checked by RT-PCR and found not to be differentially regulated with low and high PRA:PRB ratio. @ - R – validation by quantitative realtime RT-PCR, S – validation by semi-quantitative RT-PCR.
