# Supplementary material for: Altered Progesterone Receptor Isoform Expression Remodels Progestin Responsiveness of Breast Cancer Cells
Source: Oxford University Press journal article supplement (doi:10.1210/me.2005-0126), 2005-06-24
Supplement: supplemental_table_2.xls [file supplemental_table_2.xls]

## Sheet: all_raw_filt
	6h T47DE3 PRA:PRB=1.3	6h T47DE3 PRA:PRB=2.0	6h T47DE3 PRA:PRB=1.3	6h T47DE3 PRA:PRB=2.0	6h T47DN5 PRA:PRB=1.8	6h T47DN5 PRA:PRB=5.1	6h T47DN5 PRA:PRB=1.8	6h T47DN5 PRA:PRB=5.1	6h T47DB8 PRA:PRB=2.1	6h T47DB8 PRA:PRB=4.8	6h T47DB8 PRA:PRB=2.1	6h T47DB8 PRA:PRB=4.8	48h T47DN5 PRA:PRB=1.8	48h T47DN5 PRA:PRB=5.1	48h T47DN5 PRA:PRB=1.8	48h T47DN5 PRA:PRB=5.1
W56266	0.0103908	-0.445497	NA	-0.431716	0.0232869	-0.0104098	NA	-0.0552824	-0.131733	0.0717907	-0.269187	-0.189761	0.0191088	NA	-0.0514986	-0.141869
W56266	0.120121	-0.387299	NA	-0.377259	0.0538918	0.0516533	NA	-0.081173	-0.0717706	0.725199	-0.277474	-0.163825	0.887525	NA	0.00710339	-0.0159959
R40127	NA	NA	NA	NA	NA	NA	NA	NA	NA	NA	NA	NA	NA	NA	-0.0976108	NA
R40127	NA	NA	NA	NA	NA	NA	NA	NA	NA	NA	NA	NA	NA	NA	NA	-0.119909
H73714	-0.137504	-0.432959	NA	-0.385891	-0.370675	NA	NA	-0.969754	NA	NA	-0.299782	NA	NA	NA	-0.159199	-0.565597
H73714	-0.360147	-0.572081	NA	-0.344828	NA	NA	NA	-0.794292	NA	NA	-0.4994	NA	NA	NA	-0.0612002	-0.172061
AA458868	-0.498321	-0.901522	-0.39689	-1.35614	-0.656818	-0.807355	NA	-1.5184	NA	0.552696	-1.17133	-1.07732	NA	NA	-0.829173	-0.0296963
AA458868	-0.596158	-1.06088	-0.684071	-1.56937	-0.214125	-0.846377	NA	-1.6362	NA	NA	-1.29233	-1.05601	0.137504	NA	-0.78799	-0.0231848
AA234982	NA	NA	NA	NA	NA	NA	NA	NA	NA	0.856772	NA	NA	NA	NA	NA	NA
AA234982	NA	NA	NA	NA	NA	NA	NA	NA	NA	NA	NA	NA	NA	NA	NA	NA
T69271	NA	NA	NA	NA	NA	NA	NA	NA	NA	NA	NA	NA	NA	NA	NA	NA
T69271	NA	NA	NA	NA	NA	NA	NA	NA	NA	0.382107	NA	NA	NA	NA	-0.0379679	NA
AA425102	-0.575312	NA	NA	NA	-0.0658021	NA	NA	NA	NA	0.915008	NA	NA	NA	NA	NA	NA
AA425102	-0.588165	NA	NA	NA	0	NA	NA	NA	NA	NA	NA	NA	NA	NA	NA	NA
AA447684	NA	NA	NA	NA	NA	NA	NA	NA	NA	0.505699	NA	NA	NA	NA	NA	NA
AA447684	NA	NA	NA	NA	NA	NA	NA	NA	NA	NA	NA	NA	NA	NA	NA	NA
N59426	-0.337897	-0.706062	-0.468941	-0.527655	-0.367103	-0.307804	-0.424083	-1.03008	-0.358454	0.0387636	-0.56662	-0.212197	-0.367371	NA	-0.62293	NA
N59426	-0.223572	-0.523035	-0.521103	-0.418501	-0.139443	-0.304454	-0.377511	-0.835585	-0.375831	0.39079	-0.525039	-0.324814	-0.725378	NA	-1.18057	NA
AA464532	-0.281771	-1.11243	0.0327651	-0.352789	0.503835	-0.128733	0.206919	-0.770866	-0.0885939	-0.0938535	0.551672	-0.334069	NA	NA	NA	NA
AA464532	-0.251197	-1.08694	0.104108	-0.360102	0.261004	-0.180572	0.157952	-0.643435	-0.228159	NA	0.501915	-0.432667	NA	NA	NA	NA
R22050	-0.250767	NA	-0.344828	NA	NA	NA	-0.0238467	NA	NA	NA	NA	NA	NA	NA	NA	NA
R22050	-0.261265	NA	NA	NA	NA	NA	NA	NA	NA	NA	NA	NA	NA	NA	NA	NA
AA026644	NA	NA	NA	NA	NA	NA	NA	NA	NA	NA	NA	NA	NA	NA	NA	NA
AA026644	NA	NA	NA	NA	NA	NA	NA	NA	NA	NA	NA	NA	NA	NA	NA	NA
AA520978	-0.115854	-0.584363	NA	-0.832649	-0.132433	-0.175707	NA	-0.670137	-0.490675	NA	-0.317234	-0.833783	0.356061	NA	0.772572	0.685516
AA520978	-0.134313	-0.63859	NA	-0.687477	-0.0362635	-0.18277	NA	-0.713735	-0.529586	-0.127379	-0.25048	-0.607232	0.429774	NA	0.767425	0.668487
AA284669	-0.220299	NA	NA	NA	NA	NA	NA	-0.180572	NA	0.923466	-0.180572	NA	NA	NA	NA	NA
AA284669	-0.395301	NA	NA	NA	NA	NA	NA	NA	NA	NA	NA	NA	NA	NA	NA	NA
AA461527	-0.100499	-0.465975	-0.592893	-0.519404	-0.0495954	-0.322175	-0.540434	-0.665492	-0.130101	0.422437	-0.477499	-0.237558	0.358216	0.296617	0.299871	0.201504
AA461527	-0.143806	-0.513326	-0.519374	-0.545036	-0.000275744	-0.34016	-0.440673	-0.684811	-0.0944054	0.493467	-0.470725	-0.256867	0.40114	0.239964	0.218514	0.310576
T50498	0.315278	-0.268489	0.156468	0.310657	0.720338	0.547681	0.394551	0.26836	0.453547	1.02086	0.538582	0.455318	0.36592	2.70889	0.479545	2.6891
T50498	0.28333	-0.0514155	0.3277	0.281941	0.605902	0.385571	0.480489	0.306559	0.276907	1.02791	0.517773	0.447956	0.484986	2.66722	0.458116	2.62912
H14808	NA	NA	NA	NA	NA	NA	NA	NA	NA	NA	NA	NA	NA	NA	-0.286881	NA
H14808	NA	NA	NA	NA	NA	NA	NA	-0.214125	NA	NA	NA	NA	NA	NA	-0.32577	NA
AA196000	-0.198024	-0.512648	0.00384207	-0.270302	0.302438	0.028289	NA	0.0277832	NA	NA	0.153012	-0.126124	NA	NA	-0.133125	-0.124328
AA196000	-0.162963	-0.289858	-0.118549	-0.071678	0.207022	NA	NA	-0.0615547	NA	NA	0.090364	-0.158129	NA	NA	-0.519374	-0.532321
N99003	-0.47341	-0.672948	-0.412495	-0.315305	-0.00449088	-0.342261	-0.444507	-0.154221	-0.036728	0.522617	-0.0423315	0.0733644	-0.218265	NA	-0.639054	-0.951657
N99003	-0.319435	-0.647413	-0.408994	-0.281182	-0.0529813	-0.32334	-0.243323	-0.250849	-0.107789	0.268515	-0.0171157	0.0319023	-0.457682	NA	-0.587598	-0.763214
AA464163	-0.682434	-1.05518	0.00531054	-0.0393129	0.0151817	-0.399007	0.171714	-0.266231	-0.0188283	0.546984	0.00264914	0.053548	-0.248869	-0.691878	-0.212017	-0.631978
AA464163	-0.564927	-1.02541	0.0303491	-0.0690596	-0.019641	-0.408259	0.184776	-0.236181	-0.058344	0.527324	-0.042043	-0.010577	-0.247928	-0.801848	-0.20982	-0.55229
N54494	NA	NA	NA	NA	NA	NA	NA	NA	NA	NA	NA	NA	NA	NA	NA	NA
N54494	NA	NA	NA	NA	NA	NA	NA	NA	NA	NA	NA	NA	NA	NA	-0.141869	NA
R42630	NA	NA	NA	NA	NA	NA	NA	NA	NA	NA	NA	NA	NA	NA	NA	0.0412882
R42630	NA	NA	NA	NA	NA	NA	NA	NA	NA	NA	NA	NA	NA	NA	NA	NA
AA070997	-0.506333	-0.821981	-0.275591	-0.381001	-0.150545	-0.174546	-0.103093	NA	-0.0350825	-0.0805817	-0.190809	0.037526	-0.0257887	0.46305	0.0474044	0.459376
AA070997	-0.395557	-0.765355	-0.109839	-0.321928	-0.0932976	-0.196448	-0.0132832	-0.106643	-0.124627	0.271372	-0.160344	0.0337488	-0.089539	0.468404	-0.0112086	0.431188
AA479102	NA	NA	-0.298658	-0.426588	NA	NA	-0.36215	NA	NA	NA	NA	NA	NA	NA	NA	-0.0795203
AA479102	NA	NA	-0.0519521	-0.549258	NA	NA	-0.322856	NA	NA	NA	NA	NA	NA	NA	NA	NA
AA025819	NA	NA	NA	NA	NA	NA	NA	NA	NA	NA	NA	NA	NA	NA	NA	NA
AA025819	NA	NA	NA	NA	NA	NA	NA	NA	NA	NA	NA	NA	NA	NA	NA	NA
W46900	-0.143013	NA	NA	NA	NA	NA	NA	-0.0332762	NA	NA	-0.400538	NA	NA	NA	NA	NA
W46900	-0.32052	NA	NA	NA	NA	NA	NA	NA	NA	NA	-0.456378	NA	NA	NA	NA	NA
W23690	-0.282934	NA	NA	NA	NA	NA	NA	-0.455679	NA	NA	-0.0757778	NA	NA	NA	0.263511	0.670001
W23690	-0.298658	NA	NA	NA	NA	NA	NA	-0.277147	NA	NA	-0.167362	NA	NA	NA	0.418974	0.49173
W21127	NA	NA	NA	NA	NA	NA	NA	-0.214125	NA	NA	NA	NA	NA	NA	NA	NA
W21127	NA	NA	NA	NA	NA	NA	NA	NA	NA	NA	NA	NA	NA	NA	NA	NA
R88243	NA	NA	NA	NA	NA	NA	NA	-0.124328	NA	NA	NA	NA	NA	NA	-0.416867	-0.443607
R88243	NA	NA	NA	NA	NA	NA	NA	NA	NA	NA	-0.197446	NA	NA	NA	0.00549599	-0.425635
AA425772	-0.603035	-1.08282	-0.365232	-0.414642	-0.0949177	-0.449884	0.0249944	-0.388206	-0.396057	0.553836	-0.356626	-0.243969	0.311878	0.304209	0.568995	0.521854
AA425772	-0.458529	-1.04223	-0.346084	-0.331721	0.0117684	-0.427761	-0.194322	-0.508464	-0.13069	0.391499	-0.380941	-0.285695	0.322363	0.374589	0.552247	0.534507
AA431849	-0.156954	-0.609512	-0.615082	-0.677971	-0.0667592	-0.496938	-0.566659	-0.871128	-0.178113	NA	-0.647703	-0.362896	0.107497	0.718835	0.0729794	0.315193
AA431849	-0.279826	-0.617446	-0.651824	-0.702489	-0.107146	-0.460987	-0.54876	-0.841603	-0.00104279	NA	-0.563494	-0.361151	0.0838179	0.640759	0.135823	0.42174
AA169183	NA	NA	NA	NA	NA	NA	NA	NA	NA	NA	NA	NA	NA	NA	NA	NA
AA169183	NA	NA	NA	NA	NA	NA	NA	NA	NA	NA	NA	NA	NA	NA	NA	NA
AA452148	NA	NA	NA	NA	NA	NA	NA	NA	NA	NA	NA	NA	NA	NA	-0.230613	-0.688561
AA452148	NA	NA	NA	NA	NA	NA	NA	NA	NA	NA	NA	NA	NA	NA	-0.214125	-0.382206
H12312	-0.0762727	-0.855097	-0.215268	-0.597714	0.205172	NA	-0.0393487	-0.629162	NA	-0.22741	-0.282677	-0.503168	NA	NA	-0.363638	NA
H12312	-0.0501421	-0.675709	-0.21654	-0.260982	0.0426443	NA	-0.32816	-0.869213	NA	-0.146318	-0.202702	-0.577545	NA	NA	-0.128733	NA
AA280514	-0.384623	-0.73964	-0.638356	-0.806504	-0.129926	-0.656813	-0.523973	-1.018	-0.342602	0.210422	-0.458927	-0.510138	-0.62306	-0.495371	-0.478904	-0.668376
AA280514	-0.333737	-0.729781	-0.672717	-0.7561	-0.120984	-0.664985	-0.555022	-1.04054	-0.366614	0.360162	-0.430404	-0.51812	-0.570154	-0.472509	-0.437142	-0.597612
AA486207	-0.51307	-0.431589	-0.109999	-0.0891412	0.0699626	-0.0995357	-0.082771	-0.376859	NA	0.374982	-0.182802	-0.133837	-0.216857	-0.0429333	0.098947	-0.0802539
AA486207	-0.148438	-0.306457	-0.0951062	-0.15452	-0.0509009	0.0370259	-0.133091	-0.359749	NA	NA	-0.213687	-0.0833534	-0.226587	-0.0479775	-0.0881804	-0.120889
AA444051	NA	0.42414	0.664034	0.531586	0.840563	0.693573	NA	0.311547	0.49228	0.568843	0.520111	0.512335	NA	NA	NA	0.67047
AA444051	0.694962	0.38462	0.61471	0.644857	0.883949	0.751041	NA	0.275931	0.770394	NA	0.440573	0.669	NA	NA	0.020909	0.959716
H95960	NA	NA	NA	NA	NA	NA	NA	NA	NA	NA	NA	NA	NA	NA	NA	NA
H95960	NA	NA	NA	NA	NA	NA	NA	NA	NA	0.762703	NA	NA	NA	NA	NA	NA
R91570	NA	NA	NA	NA	NA	NA	NA	NA	NA	NA	NA	NA	NA	NA	NA	NA
R91570	NA	NA	NA	NA	NA	NA	NA	NA	NA	NA	NA	NA	NA	NA	NA	NA
AA677522	NA	NA	NA	NA	NA	NA	NA	NA	NA	NA	NA	NA	NA	NA	NA	NA
AA677522	NA	NA	NA	NA	NA	NA	NA	NA	NA	NA	NA	NA	NA	NA	NA	NA
AA699926	NA	-0.47854	-0.00958605	-0.282934	NA	NA	NA	-0.43535	NA	NA	-0.216719	NA	NA	NA	-0.77961	-0.607232
AA699926	-0.226509	-0.193246	-0.0840643	-0.163499	NA	NA	NA	-0.503403	NA	NA	-0.0606628	NA	NA	NA	-0.613532	-0.443607
N50549	-0.30575	-0.722251	-0.468448	-0.526299	-0.149252	NA	-0.350801	-0.659726	-0.221558	NA	-0.539829	-0.290075	-0.194438	NA	-0.2144	-0.148635
N50549	-0.330739	-0.813345	-0.540568	-0.472402	0.0236126	-0.24591	-0.394972	-0.59281	0.150203	0.303254	-0.510774	-0.210401	-0.218499	0.102098	-0.560276	0.0149503
AA608988	NA	-0.512379	-0.450443	-0.460111	-0.0931094	-0.502242	-0.412782	-0.730552	-0.108573	0.253975	-0.387381	-0.25093	NA	NA	-0.492205	-0.306171
AA608988	NA	-0.488879	-0.461417	-0.587546	-0.0814552	-0.459432	-0.295167	-0.752172	-0.103836	NA	-0.302139	-0.286606	NA	NA	-0.284918	-0.218265
AA663310	-0.330656	-0.475661	-0.536868	-0.293228	0.0214983	-0.450563	-0.0797005	-0.55049	-0.0891259	NA	-0.365416	-0.309869	-0.584963	NA	-0.440066	-0.918386
AA663310	-0.209823	-0.523609	-0.481257	-0.353016	-0.000839508	-0.508854	-0.180315	-0.738791	-0.0755071	0.0566452	-0.391117	-0.30569	-0.773996	NA	-0.499102	-1.20789
AA630120	-0.926379	-1.1788	-0.418479	-0.455291	-0.285606	-0.519183	-0.0986767	-0.387567	-0.293779	0.415608	-0.135103	0.00199474	-0.750127	-1.25701	-0.455174	-2.15534
AA630120	-0.83058	-1.15806	-0.469485	-0.453346	-0.241527	-0.49015	-0.163212	-0.441871	-0.235093	0.294678	-0.143094	0.00532033	-0.709252	-1.41864	-0.319227	-2.11603
AA130187	-1.23447	-1.69947	-1.31034	-1.52774	-1.52925	-0.662965	-1.80047	-1.6523	-0.429393	-0.0772757	-0.953576	-0.745596	NA	NA	-1.05658	-2.18269
AA130187	-1.41383	-1.73697	-1.61196	-1.53107	-1.48714	-0.748461	-1.85864	-1.63227	-0.436517	-0.396842	-0.900464	-0.665999	-0.172061	NA	-1.20789	-2.22959
AA211508	-0.191823	-0.691385	0.00227554	-0.0224986	0.411725	0.0186157	0.0866487	-0.504508	-0.214125	0.243598	0.163499	-0.159165	0.48226	NA	0.263034	-0.282934
AA211508	-0.0901778	-0.779042	0.146389	0.0211992	0.0832134	-0.346538	0.0614574	-0.551214	-0.294743	0.461077	0.120972	-0.137688	0.54223	NA	0.221881	-0.357003
AA629838	-0.133403	-0.488628	-0.096661	-0.19588	0.301076	-0.31034	-0.00455468	-0.614023	-0.153545	0.318556	-0.0788762	-0.298354	-0.120774	NA	-0.149613	0.35707
AA629838	0.00836994	-0.452917	-0.0846421	-0.216998	0.253501	-0.407018	0.0145632	-0.655178	-0.0450097	0.456574	-0.0814148	-0.249359	-0.00773565	NA	0.161657	0.487398
AA189050	-0.120369	-0.93787	NA	NA	0.0131411	NA	NA	-0.285689	NA	NA	-0.13945	NA	0.233085	0.18513	0.00512048	0.429296
AA189050	-0.355322	-0.852333	NA	-0.0426443	0.182286	-0.0565835	NA	-0.261652	-0.260709	0.170747	-0.257067	NA	0.12744	0.176323	0.0423697	0.396873
N66871	-0.0996415	-0.573956	NA	NA	-0.310206	NA	NA	-0.807355	NA	NA	-0.695994	NA	NA	NA	NA	NA
N66871	-0.0259952	-0.613556	NA	NA	-0.0822271	NA	NA	NA	-0.0285692	NA	-0.650765	NA	NA	NA	NA	NA
R68805	-0.350525	-0.747196	-0.524279	-0.656776	-0.0416202	-0.364256	-0.552541	-0.519939	-0.283313	-0.0435016	-0.363322	-0.320922	-0.305141	-0.318076	-0.44174	-0.66289
R68805	-0.272366	-0.745467	-0.641094	-0.636331	-0.000860198	-0.440402	-0.397862	-0.616453	-0.179696	0.429092	-0.309813	-0.297825	-0.364001	-0.514573	-0.430875	-0.443042
AA037229	-0.420078	-0.628906	NA	NA	-0.0535495	-0.323335	NA	-0.723532	-0.176289	0.319969	NA	NA	NA	NA	-0.298658	-0.193246
AA037229	-0.280335	-0.495799	NA	-0.214125	0.132147	-0.445546	NA	-0.201634	-0.163499	NA	NA	NA	NA	NA	-0.344828	-0.226509
AA629808	-0.122617	-0.392266	-0.423794	-0.352378	0.109635	-0.205719	-0.382446	-0.388971	-0.00883515	0.633377	-0.330849	0.039177	-0.098672	-0.204916	-0.255495	0.207529
AA629808	-0.117074	-0.469335	-0.42483	-0.335928	0.072727	-0.2446	-0.362391	-0.551382	0.00920343	0.632381	-0.298895	0.0575259	-0.114015	-0.221759	-0.160049	0.23133
AA678021	-0.413406	-0.588249	-0.461686	-0.373068	-0.0362725	-0.590642	-0.303228	-0.644691	-0.1173	0.664526	-0.353054	-0.0968178	-0.560474	-0.136007	-0.534725	0.0466657
AA678021	-0.325508	-0.279447	-0.507704	-0.430286	-0.00106511	-0.633928	-0.285801	-0.585511	-0.149465	0.644012	-0.365464	-0.0833274	-0.571335	-0.182108	-0.546481	0.0509073
AA182848	NA	NA	NA	NA	NA	NA	NA	NA	NA	0.49799	NA	NA	NA	NA	NA	NA
AA182848	-0.176323	NA	NA	NA	NA	NA	NA	NA	NA	NA	NA	NA	NA	NA	NA	NA
N67262	0.310849	NA	NA	NA	NA	NA	NA	NA	NA	NA	-0.594414	-0.542793	NA	NA	0	0.111031
N67262	NA	NA	NA	NA	NA	NA	NA	-0.106572	NA	NA	-0.701809	-0.562344	NA	NA	NA	NA
AA702541	-0.251722	-0.782825	0.0923555	0.114736	0.180398	-0.168175	0.0241461	0.00988828	-0.0803938	0.40546	0.0722587	-0.0487886	1.06602	1.31184	1.47229	1.53356
AA702541	-0.2897	-0.792558	0.241487	0.164758	0.188702	0.0696129	0.0972972	-0.0656336	-0.10758	0.578449	0.12998	-0.00921117	1.11971	1.32675	1.58102	1.54773
H15718	0.233236	-0.176525	0.676885	0.535861	0.632268	NA	0.61949	0.453212	NA	NA	0.698792	0.639522	0.820611	NA	1.25765	0.319978
H15718	0.267884	-0.197358	0.749155	0.592319	0.481988	NA	0.752072	0.47631	NA	0.605047	0.683929	0.676303	0.893085	NA	1.2124	0.264831
W45148	0.0259222	-0.513001	-0.443519	-0.373852	0.0871164	-0.244944	-0.317144	-0.522931	-0.0612668	0.396154	-0.242065	-0.00114819	0.121339	0.947148	-0.0160507	0.661727
W45148	-0.0588014	-0.205755	-0.481388	-0.296982	0	-0.155605	-0.185249	-0.668253	-0.112168	0.551891	-0.327685	-0.0817279	0.167962	0.954569	0.0176638	0.7597
AA676663	NA	NA	NA	NA	NA	NA	NA	NA	NA	-0.387631	NA	NA	NA	NA	NA	NA
AA676663	NA	NA	NA	NA	NA	NA	NA	NA	NA	-0.437656	NA	NA	NA	NA	NA	NA
AA459244	-0.194404	-0.559345	NA	NA	-0.0244946	-0.449526	NA	-0.726214	-0.326881	0.681781	-0.559427	-0.523209	0.214966	NA	-0.1541	-0.000863114
AA459244	-0.120423	-0.621705	NA	-0.644625	0.0227559	-0.375115	NA	-0.887991	-0.260146	0.654479	-0.527638	-0.589156	0.00805227	NA	-0.15072	0.0317321
AA465236	-0.230451	-0.560734	NA	NA	0.108263	-0.101307	NA	NA	-0.122656	0.505031	-0.0363551	-0.183585	0.932443	0.740455	1.03363	0.942218
AA465236	-0.150844	-0.652432	NA	NA	0.217814	-0.195487	NA	NA	0.0208085	0.672777	0.00194617	-0.112866	0.856687	0.908078	1.01379	0.938786
AA455640	-0.10296	-0.476154	-0.687213	NA	0.0320191	-0.119928	NA	-0.578016	-0.145897	0.597613	-0.366621	-0.204651	-0.578563	-0.148323	-0.559751	-0.136841
AA455640	-0.14972	-0.476109	-0.623437	-0.494292	0.016734	-0.161345	NA	-0.584067	-0.113578	0.349701	-0.39939	-0.277895	-0.58856	-0.228955	-0.592595	-0.0675414
AA282936	-0.314381	-0.665962	-1.00959	-1.2308	-0.0686564	-0.902703	NA	-1.53136	NA	NA	-0.886462	-1.24207	-1.41323	NA	-1.12653	-1.71516
AA282936	-0.325925	-0.417991	-1.19989	-1.28081	-0.0369626	-0.578536	-0.359896	-1.37881	-0.874469	NA	-1.13628	-1.20994	-1.65992	NA	-1.0612	-1.62761
AA258001	-0.588666	-0.201634	-0.159199	NA	NA	NA	NA	NA	NA	NA	-0.347127	-0.314213	NA	NA	-0.509274	1.52867
AA258001	NA	-0.698959	-0.333424	NA	NA	NA	NA	-0.290818	NA	NA	-0.327612	-0.298658	NA	NA	-0.423971	1.38412
R45961	-0.354594	-0.666522	-0.286881	NA	-0.122947	NA	NA	NA	-0.393233	NA	-0.574838	-0.719549	1.07018	0.464668	1.0607	1.08746
R45961	0.0105848	-0.715606	-0.85599	NA	0.0750134	-0.422233	NA	NA	NA	0.306062	-0.678072	-0.385891	1.15837	0.771181	1.09801	0.890771
AA916906	NA	NA	NA	NA	NA	NA	NA	NA	NA	0.0367586	NA	NA	NA	NA	NA	NA
AA916906	NA	NA	NA	NA	NA	NA	NA	NA	NA	NA	NA	NA	NA	NA	-0.0885939	NA
AA426352	-0.11078	-0.921288	-0.205153	NA	NA	NA	NA	-0.671479	NA	NA	-0.0976108	-0.678072	NA	NA	-0.0285692	-0.106572
AA426352	-0.100186	NA	-0.194229	NA	NA	NA	NA	NA	NA	NA	-0.15277	-0.615109	NA	NA	-0.00958605	NA
T55558	NA	NA	-0.555337	-0.643856	NA	NA	-0.292393	-0.724735	NA	NA	-0.640022	-0.432026	NA	NA	NA	1.3084
T55558	NA	NA	-0.539095	-0.5974	NA	NA	-0.390739	-0.687061	NA	NA	-0.542664	-0.405399	NA	NA	-0.0789513	1.35961
AA629719	-0.344331	-0.609448	-0.356332	-0.304724	-0.0403321	-0.430226	-0.0679124	-0.417989	-0.101225	0.713648	-0.306048	-0.0379663	-0.0243242	0.0651424	0.141581	0.127816
AA629719	-0.354856	-0.582366	-0.310435	-0.3026	0.0117416	-0.436181	-0.0583838	-0.4432	-0.0201982	0.717381	-0.307775	-0.0287607	0.0142139	-0.0369773	0.0556605	0.144012
AA459211	-0.206796	-0.574978	-0.182562	-0.19534	0.111421	-0.157656	-0.274757	-0.410164	-0.14142	NA	-0.203713	-0.210726	0.211875	0.0379679	0.353427	0.738875
AA459211	-0.226405	-0.587867	-0.098021	-0.499168	-0.0393129	-0.071297	-0.204416	-0.412782	-0.165249	-0.13446	-0.159541	-0.206082	0.254978	0.0885939	0.247828	0.618046
AA164705	-0.0762952	-0.398612	-0.615082	-0.805541	-0.199648	NA	-0.718818	-0.584963	-0.263034	0.302332	-0.631472	-0.389487	-0.189034	NA	-0.371094	-0.538821
AA164705	-0.113075	-0.456378	-0.626429	-0.62829	-0.124258	NA	-0.411426	-0.905608	-0.163499	0.367545	-0.491045	-0.465178	-0.248679	NA	-0.167786	-0.278976
AA099487	-0.49322	NA	NA	-0.22191	-0.0521513	NA	NA	-0.399012	-0.137504	NA	-0.141533	0.00570236	-0.33383	NA	-0.454977	-0.302035
AA099487	-0.423466	NA	NA	-0.302955	0.0365259	NA	NA	-0.318055	0.00863892	NA	0.150212	-0.134228	-0.367637	NA	-0.607721	-0.258841
AA436564	-0.459054	-0.425817	-0.603225	-0.584963	0.116351	NA	NA	-0.67715	NA	NA	-0.253502	-0.306889	0.0332762	NA	0.475231	1.39715
AA436564	-0.426609	-0.751877	-0.596861	-0.489555	0.151066	NA	0	-0.632008	NA	-0.279224	-0.228164	-0.218662	0.238787	NA	0.260528	1.16466
AA426096	-0.182743	-0.838719	-0.233913	-0.345455	0.163438	-0.210474	-0.209973	-0.554251	-0.169212	NA	-0.21552	-0.528468	-1.68107	-0.675063	-1.85691	-3.07182
AA426096	-0.348821	-0.725493	-0.168506	-0.461201	0.151838	-0.249743	-0.329233	-0.695467	-0.231853	-0.353774	-0.203867	-0.533604	-1.76977	-0.978196	-1.7008	-2.93325
W72697	NA	NA	NA	-1.14622	NA	NA	NA	-1.04522	NA	0.01543	-0.866733	-0.471988	NA	NA	-0.448952	-0.705039
W72697	-0.184809	NA	NA	-0.905608	NA	NA	NA	-1.10679	NA	NA	-0.744197	-0.401832	NA	NA	-0.704125	-0.455921
R55188	-0.509499	-0.559024	-0.368067	-0.487864	-0.0913109	-0.449079	-0.305535	-0.723308	-0.208947	0.579437	-0.169772	-0.326026	0.328671	-0.0379679	-0.158599	-0.158846
R55188	-0.47425	-0.635252	-0.452906	-0.524568	-0.151784	-0.441422	-0.214779	-0.641354	-0.0894557	0.100239	-0.202839	-0.225342	0.201515	-0.230613	-0.15551	-0.273352
AA446120	NA	NA	-0.0840643	-0.127756	NA	NA	NA	0.219966	NA	NA	NA	NA	NA	NA	-0.250962	2.10677
AA446120	NA	NA	NA	NA	NA	NA	-0.0885939	-0.0541921	NA	NA	NA	NA	NA	NA	-0.141869	1.90613
H72018	NA	-0.945353	-0.225334	NA	-0.0402298	NA	NA	NA	-0.336158	0.35592	-0.0555514	-0.387631	0.997839	NA	1.36339	-0.663908
H72018	-0.367167	-0.907554	-0.18117	-0.322673	0.0212686	-0.168471	-0.289807	-0.366719	-0.271644	0.136651	-0.098276	-0.219507	0.979934	NA	1.29539	-0.554934
AA464557	NA	NA	-0.341037	NA	NA	NA	-0.17534	-0.327853	NA	NA	-0.230613	NA	0.280108	NA	-0.170564	0.258976
AA464557	NA	NA	-0.159199	-0.304285	NA	NA	-0.314213	-0.452738	NA	NA	-0.440128	NA	0.217381	NA	-0.499102	0.13773
AA465389	-0.222392	NA	NA	NA	NA	NA	NA	NA	NA	NA	NA	NA	NA	NA	NA	0.111031
AA465389	-0.209678	-0.543284	NA	NA	-0.0702575	-0.38758	NA	NA	-0.00480099	NA	NA	NA	NA	NA	NA	0.246915
AA443903	-0.335184	-0.536536	-0.201634	-0.180572	-0.0778573	-0.270358	NA	-0.0143553	-0.242038	0.155583	-0.442337	-0.102098	NA	NA	1.13313	1.26303
AA443903	-0.429508	-0.436517	-0.383755	-0.38037	NA	NA	-0.429508	-0.389567	NA	NA	-0.254997	-0.0976108	NA	NA	0.869213	1.87316
AA443638	-0.616331	-0.979344	-0.261708	-0.345551	-0.172525	-0.321928	0.0391318	-0.201101	-0.140389	0.513927	-0.292648	NA	-0.530515	-1.28087	-0.275741	-0.948328
AA443638	-0.296702	-1.00086	-0.229068	-0.365881	-0.144236	-0.225813	-0.0958786	0.00500068	-0.0466995	0.810827	-0.317016	-0.164501	-0.484269	-1.16993	-0.189354	-1.01606
AA598982	NA	NA	NA	NA	NA	NA	NA	NA	NA	NA	NA	NA	NA	NA	NA	NA
AA598982	NA	NA	NA	NA	NA	NA	NA	NA	NA	NA	NA	NA	NA	NA	NA	NA
R41787	NA	NA	NA	NA	NA	NA	NA	-0.581753	NA	NA	NA	NA	NA	NA	NA	NA
R41787	NA	NA	NA	NA	NA	NA	NA	NA	NA	NA	NA	NA	NA	NA	NA	NA
AA410896	-0.401862	NA	NA	NA	NA	NA	NA	-0.329602	NA	NA	NA	NA	NA	NA	-0.0332762	-0.356144
AA410896	-0.485427	NA	NA	NA	NA	NA	NA	-0.214125	NA	NA	NA	NA	NA	NA	-0.137504	NA
AA454656	-0.172558	-0.66731	0.127444	0.0905926	0.196524	0.12247	-0.0111837	-0.0872283	-0.192151	0.65738	-0.0155877	-0.0693256	0.849351	1.03147	1.1049	1.35283
AA454656	-0.176063	-0.754718	-0.0728867	0.0564095	0.244116	-0.0319248	0.117695	-0.122912	-0.0943446	0.655421	0.00266487	-0.0741068	0.753492	1.09208	1.17746	1.34087
N95249	-0.480661	-0.765376	NA	-1.13637	-0.179742	-0.688056	-0.106572	-1.13197	-0.690045	NA	-0.956878	-1.07731	0.657541	NA	0.399387	-0.10561
N95249	-0.460602	-0.790281	-0.450661	-1.07146	-0.23362	-0.604558	-0.111031	-1.21505	NA	NA	-0.912376	-1.08813	0.608744	NA	0.353091	-0.104172
AA085619	NA	NA	NA	NA	NA	NA	NA	NA	NA	NA	NA	NA	NA	NA	-0.400538	NA
AA085619	NA	NA	NA	NA	NA	NA	NA	NA	NA	NA	NA	NA	NA	NA	-0.341037	NA
AA398011	-0.365557	-0.878404	-0.704872	-0.699409	-0.162521	-0.515458	-0.842185	-0.97673	NA	NA	-0.68399	-0.548829	0.467889	0.154886	0.321393	0.73029
AA398011	-0.549314	-0.925286	-0.687913	-0.751101	-0.216636	-0.5025	-0.920649	-0.96917	NA	0.423958	-0.797131	-0.54732	0.420468	0.282934	0.404343	0.630031
N73827	NA	-1.15008	-1.12873	-1.35595	-0.290577	-0.804604	-0.965024	-1.37551	-0.314213	0.473468	-0.891724	-0.906891	-0.232523	0.234706	-0.0369324	0.775646
N73827	-0.582765	-1.01458	-0.952382	-1.20215	-0.138632	-0.936088	-0.712718	-1.46112	-0.374808	NA	-0.98179	-0.830942	0.0166467	0.234706	0.0284505	0.899943
AA478436	-0.395628	-0.818309	-0.564326	-0.720824	0.0924518	-0.409532	-0.459096	-0.964777	-0.0167234	0.69411	-0.393883	-0.315211	0.369194	-0.142563	0.500058	0.123706
AA478436	-0.438573	-0.824709	-0.67985	-0.695711	0.160465	-0.448576	-0.423387	-0.99956	0.0141673	0.698844	-0.514882	-0.421157	0.374308	-0.392685	0.568622	0.230396
W31391	-0.178848	-0.141869	NA	-0.159199	NA	NA	NA	NA	NA	NA	-0.159199	-0.0749621	NA	NA	0.915965	0.331206
W31391	-0.0439115	-0.352382	NA	-0.0191088	NA	NA	NA	NA	NA	NA	-0.176323	-0.294743	NA	NA	0.967226	0.312278
H45455	-0.527655	-1.0177	0.117548	-0.0418651	0.0162102	NA	0.256438	-0.246099	NA	NA	0.0407338	-0.153246	0.302563	NA	0.768581	0.34662
H45455	-0.394656	-0.0976108	0.0835734	-0.111393	-0.0998353	NA	0.230922	-0.246966	NA	NA	-0.0264376	-0.159389	0.465826	NA	1.10747	0.335722
R91550	0.116359	0.311105	0.226406	0.660806	NA	NA	0.33709	1.03493	0.298658	NA	1.08779	1.66484	-0.132187	0.893085	-0.186175	0.859871
R91550	0.0840643	0.383329	0.180364	0.735479	0.373153	0.710761	0.25035	0.992697	0.294743	NA	1.09516	1.62566	-0.0841271	1.13486	-0.0648511	0.823378
AA029964	NA	NA	-1.59001	NA	NA	NA	NA	NA	NA	NA	NA	NA	NA	NA	NA	NA
AA029964	NA	NA	NA	NA	NA	NA	NA	NA	NA	NA	NA	NA	NA	NA	NA	NA
R51912	NA	NA	NA	NA	NA	NA	NA	NA	NA	NA	NA	NA	NA	NA	NA	NA
R51912	NA	NA	NA	NA	NA	NA	NA	NA	NA	NA	NA	NA	NA	NA	NA	NA
AA489785	-0.559084	NA	NA	-0.874469	NA	NA	NA	-0.716766	NA	NA	-0.437082	-0.554357	0.373421	NA	-0.0829894	-0.582016
AA489785	NA	NA	NA	-0.798714	NA	NA	NA	-0.82529	NA	NA	NA	-0.626382	0.199796	NA	0.0272215	-0.859571
H56595	-0.363348	-0.641546	NA	-0.167786	-0.151655	NA	NA	-0.678379	-0.293196	NA	-0.295723	-0.411938	NA	NA	0.732606	0.778823
H56595	-0.545627	-0.861294	NA	-0.529405	-0.0940019	NA	NA	-0.664931	-0.361821	NA	-0.226873	-0.348172	NA	NA	0.786972	0.814107
T65861	-0.291766	-0.876823	NA	NA	-0.160567	-0.424071	NA	NA	-0.1657	NA	NA	NA	-0.232902	0.248599	-0.163729	-0.132481
T65861	-0.297066	-0.79327	NA	NA	-0.0924075	-0.354843	NA	NA	-0.313158	-0.457079	NA	NA	-0.0786299	0.208291	-0.204417	-0.17213
T55353	-0.586095	-1.10059	NA	-0.292393	-0.090829	-0.48866	-0.232363	-0.355036	0.0195907	0.384377	-0.0561776	-0.11405	-0.716625	-0.115477	-0.600698	0.126818
T55353	-0.538402	-1.0983	-0.286881	-0.339706	-0.17772	-0.491703	-0.121166	-0.278686	-0.119189	0.750924	-0.199858	-0.09547	-0.874039	-0.0931094	-0.582487	0.198523
AA488626	-0.493888	-0.694068	-0.612321	-0.538741	0.040765	-0.497104	-0.435505	-0.623937	-0.247667	0.554072	-0.560907	-0.22675	-0.186112	-0.519729	-0.199414	-0.432697
AA488626	-0.0962465	-0.799897	-0.647043	-0.540361	-0.169177	-0.419986	-0.422116	-0.583645	-0.115627	0.489171	-0.619854	-0.280982	-0.154867	-0.459704	-0.449115	-0.493473
T70057	NA	NA	NA	NA	NA	NA	NA	NA	NA	NA	NA	NA	NA	NA	NA	NA
T70057	NA	NA	NA	NA	NA	NA	NA	NA	NA	NA	NA	NA	NA	NA	NA	NA
AA046690	-0.514573	NA	NA	-0.955288	NA	NA	-0.516015	-0.787885	NA	NA	-0.54272	-0.343954	NA	NA	-0.343612	-0.667286
AA046690	-0.489204	NA	-0.356935	-0.976439	NA	NA	-0.491566	-0.930056	NA	NA	-0.459432	-0.442375	NA	NA	-0.0332762	-0.554497
AA488346	-0.288974	-0.871047	-0.132038	-0.161607	0.038595	-0.174412	0.051451	-0.0695615	-0.0951789	0.780631	-0.0793434	-0.0135465	1.00718	0.595658	1.01921	0.779962
AA488346	-0.310787	-0.90217	-0.0969464	-0.0833206	-0.0115723	-0.146104	0.109832	-0.0150127	-0.0810177	0.738654	-0.177154	0.0158412	1.01521	0.612774	1.2145	0.876239
AA458965	-0.362335	-0.976916	-0.237665	-0.261076	-0.101445	-0.0658021	-0.0600113	-0.304785	-0.0612002	0.417397	-0.188204	-0.433279	NA	1.38221	1.5828	4.0726
AA458965	-0.494264	-0.806058	-0.184491	-0.267435	-0.0848889	-0.263034	0.00526724	-0.245941	-0.172061	NA	-0.251206	-0.405854	NA	1.42582	1.35556	3.94645
AA447618	NA	NA	NA	NA	NA	NA	NA	NA	NA	NA	NA	NA	NA	NA	NA	NA
AA447618	NA	NA	NA	NA	NA	NA	NA	NA	NA	NA	NA	NA	NA	NA	NA	NA
T59641	NA	NA	NA	NA	NA	NA	NA	NA	NA	NA	NA	NA	NA	NA	-0.0749621	-0.337235
T59641	NA	NA	NA	NA	NA	NA	NA	NA	NA	NA	NA	NA	NA	NA	NA	-0.282934
R73545	NA	NA	-0.167786	-0.202243	NA	NA	NA	-0.229308	NA	NA	-0.0775366	-0.0568878	0.329568	NA	-0.273872	-1.27009
R73545	-0.209973	NA	-0.250962	-0.193538	NA	NA	NA	-0.297222	NA	NA	-0.0194669	-0.189089	NA	NA	-0.31053	-1.22194
AA469965	NA	NA	NA	NA	NA	NA	NA	NA	NA	NA	0.102098	NA	NA	NA	-0.242857	NA
AA469965	NA	NA	NA	NA	NA	NA	NA	NA	NA	NA	0.154886	NA	NA	NA	-0.184809	-0.282934
N91385	NA	NA	-0.669413	-0.550474	NA	NA	-0.46591	-0.705448	NA	NA	-0.234234	-0.25704	NA	NA	-0.321928	-0.0612002
N91385	NA	NA	-0.58601	-0.434787	NA	NA	-0.373217	-0.670393	NA	NA	-0.399407	-0.31088	NA	NA	-0.154886	-0.133125
AA488610	-0.275634	NA	NA	-0.41177	NA	NA	-0.163499	-0.568416	NA	-0.15788	-0.0721244	-0.522777	-1.47393	-1.5042	-1.45933	-2.16979
AA488610	-0.128733	NA	-0.499102	-0.469615	NA	NA	-0.121464	-0.514056	NA	NA	-0.0484404	-0.468803	-1.67144	-0.956057	-1.35213	-2.0109
R71093	-0.291356	-0.572081	-0.272437	-0.248698	NA	-0.168358	-0.0161772	-0.319705	NA	0.285621	-0.505784	-0.379275	-0.604478	0.458602	-0.558087	0.394902
R71093	-0.307822	-0.271027	-0.212744	-0.220217	0.051469	NA	-0.00591673	-0.351871	NA	NA	-0.36092	-0.371434	-0.550341	0.427246	-0.505355	0.508693
T67057	NA	NA	NA	0.385891	NA	NA	0.22177	0.111179	NA	NA	0.456997	0.318822	-0.0931094	NA	-0.15078	-0.984058
T67057	NA	NA	NA	0.0565835	NA	NA	0.105573	0.425484	NA	NA	0.403633	0.352774	NA	NA	-0.214265	-1.14253
AA481758	-0.313565	NA	-0.111927	-0.154561	0	NA	0.0555749	-0.0892007	NA	NA	0.0301062	-0.0941101	1.08171	0.197446	0.895166	0.536753
AA481758	0	NA	-0.255407	-0.133784	NA	NA	0.0441901	-0.160791	NA	-0.393584	-0.0520657	-0.0459679	1.16685	0.390315	0.961153	0.368169
T48950	NA	NA	NA	NA	NA	NA	NA	NA	NA	NA	NA	NA	NA	NA	NA	NA
T48950	NA	NA	NA	NA	NA	NA	NA	NA	NA	NA	NA	NA	NA	NA	NA	NA
AA036975	-0.15056	NA	NA	NA	NA	NA	NA	NA	NA	NA	-0.0749621	NA	NA	NA	NA	NA
AA036975	-0.0519521	NA	NA	NA	NA	NA	NA	NA	NA	-0.106915	-0.124328	-0.0426443	NA	NA	NA	NA
AA598817	NA	-0.559084	-0.72091	-0.931666	NA	NA	-0.604945	-0.929733	NA	NA	-0.791336	-0.860624	-0.286068	-0.404177	0.0104489	-1.35444
AA598817	NA	-0.137504	-0.841935	-0.961786	NA	NA	-0.52378	-0.955517	NA	NA	-0.659456	-0.831415	0.0357219	-0.485427	0.145907	-1.56018
AA480906	-0.358135	-1.05174	-0.778515	-1.18538	0.196096	-0.89328	-0.291645	-1.38721	-0.499102	NA	-1.36319	-1.56918	1.61031	1.21164	1.69928	1.1332
AA480906	-0.494371	-1.1939	-0.760066	-1.21553	0.108524	-0.902703	-0.330054	-1.45039	NA	0.21172	-1.30636	-1.52753	1.64209	1.2276	1.67181	1.03357
AA454652	NA	NA	NA	NA	NA	NA	NA	NA	NA	0.0394203	NA	NA	NA	NA	NA	NA
AA454652	NA	NA	NA	NA	NA	NA	NA	NA	NA	-0.614233	NA	NA	NA	NA	NA	NA
AA668527	-0.0743056	-0.359896	NA	-0.21818	NA	NA	NA	-0.337721	NA	NA	0.49299	0.0194962	0.298658	NA	0.259032	-0.55821
AA668527	-0.172619	NA	NA	-0.287329	NA	NA	NA	-0.446179	NA	NA	0.353179	-0.0164131	0.400538	NA	0.481425	-0.491853
AA702663	-0.152863	-0.00480099	NA	0.0220263	0.167894	NA	NA	-0.100841	NA	NA	0.217888	-0.273018	NA	NA	-0.16662	-0.470327
AA702663	-0.476535	NA	NA	0.110558	0.0397705	NA	NA	0.018859	NA	NA	0.23377	NA	NA	NA	-0.103396	-0.477987
R63918	-0.379129	-0.512648	NA	NA	0.0471867	NA	NA	-0.78579	NA	NA	-0.162815	NA	NA	NA	NA	NA
R63918	-0.385473	-0.242857	NA	NA	-0.153936	-0.00480099	NA	-0.68741	NA	NA	-0.303676	NA	NA	NA	NA	-0.184809
AA678139	-0.154886	NA	-0.176323	NA	NA	NA	NA	-0.443112	NA	-0.187086	-0.271596	-0.114679	-0.115108	NA	-0.11604	0.0545083
AA678139	NA	NA	-0.290818	-0.571776	NA	NA	NA	-0.474268	NA	NA	-0.234645	-0.187933	-0.0824622	NA	-0.139469	-0.0369374
T58873	NA	NA	NA	NA	NA	NA	NA	NA	NA	NA	NA	NA	NA	NA	0.278976	0.505891
T58873	NA	NA	NA	NA	NA	NA	NA	NA	NA	-0.271027	NA	NA	NA	NA	0.344828	0.382206
R51052	NA	NA	NA	NA	NA	NA	NA	0.358192	NA	NA	NA	NA	NA	NA	-0.314213	-0.263034
R51052	NA	NA	NA	NA	NA	NA	NA	NA	NA	NA	NA	NA	NA	NA	-0.306457	-0.0473057
R08935	-0.305253	-0.486987	-0.0379679	NA	0.16409	-0.219358	NA	-0.0426443	NA	NA	-0.413521	-0.203284	-0.385251	0.272731	-0.327892	0.0260949
R08935	-0.204305	-0.378258	NA	NA	0.156202	NA	NA	-0.594549	NA	0.105768	-0.255761	-0.165923	-0.334867	0.25711	-0.319834	0.0325085
AA167223	NA	NA	NA	NA	NA	NA	NA	NA	NA	NA	NA	NA	NA	NA	NA	NA
AA167223	NA	NA	NA	NA	NA	NA	NA	NA	NA	NA	NA	NA	NA	NA	NA	NA
AA487590	NA	NA	NA	NA	NA	NA	NA	NA	NA	-0.426714	-0.00958605	NA	NA	NA	NA	NA
AA487590	NA	NA	NA	NA	NA	NA	NA	NA	NA	NA	-0.20581	NA	NA	NA	NA	NA
R79935	-0.551558	-0.862726	-0.745223	-1.08285	-0.396443	-0.0840643	-0.802953	-1.17672	-0.306756	0.147283	-0.42561	-0.373556	-0.0636833	0.11967	0.134696	1.80375
R79935	-0.669553	-0.808092	-0.753414	-1.07324	-0.455531	-0.542671	-0.797304	-1.16188	-0.323634	0.242836	-0.375847	-0.326269	-0.160465	0.207078	0.127011	1.83289
AA192419	-0.487092	-0.572684	-0.704783	-0.698653	-0.12054	-0.579868	-0.46826	-0.767673	-0.112946	0.498136	-0.414927	-0.243461	-0.314598	-0.59018	-0.492099	-0.852323
AA192419	-0.521656	-0.51667	-0.729419	-0.744487	-0.22362	-0.451187	-0.446794	-0.809461	-0.388599	-0.0612962	-0.564046	-0.248225	-0.286731	-0.473118	-0.290269	-0.660122
AA489331	NA	NA	1.14869	0.974389	NA	NA	1.32126	0.685672	NA	NA	0.458341	0.541486	NA	NA	NA	0.542671
AA489331	NA	NA	1.085	1.11514	NA	NA	1.26554	0.724597	NA	-0.407806	0.475265	0.5394	NA	NA	NA	0.390495
W56771	NA	NA	NA	NA	NA	NA	NA	NA	NA	NA	NA	NA	0.286881	NA	NA	NA
W56771	NA	NA	NA	NA	NA	NA	NA	NA	NA	NA	NA	NA	NA	NA	NA	NA
AA398458	-0.514234	NA	NA	-0.526748	NA	-0.0749621	NA	NA	NA	NA	-0.159421	-0.0909882	0.675927	NA	0.449975	-0.628991
AA398458	NA	NA	NA	-0.572251	NA	NA	NA	-0.588451	NA	NA	-0.128125	-0.235128	0.588062	NA	0.495493	-0.796824
AA664077	NA	-0.782154	0	0.218982	0.0149892	-0.089005	0.229122	0.22516	0.191633	NA	0.249142	0.307627	0.602948	0.520619	0.966467	0.898169
AA664077	-0.618613	-1.02258	0.0282337	0.291812	0.109419	-0.040642	0.180381	0.225554	0.085919	NA	0.232115	0.277246	0.587954	0.576933	0.937494	0.933553
AA630298	NA	NA	NA	NA	NA	NA	NA	-0.468149	NA	NA	NA	NA	NA	NA	NA	-0.758543
AA630298	NA	NA	NA	NA	NA	NA	NA	-0.545306	NA	NA	NA	NA	NA	NA	-0.636409	-0.565519
R46202	-0.450661	NA	0.23374	0.228379	NA	NA	0.068306	-0.117234	NA	NA	0.304968	-0.39902	0.0302542	NA	0.534739	-0.292299
R46202	NA	NA	0.0548421	0.10744	NA	NA	0.0599129	-0.0699441	NA	NA	0.2824	-0.411925	0.0548044	NA	0.627043	-0.164603
T97710	NA	NA	NA	0.0532982	NA	NA	NA	-0.0113301	NA	NA	0.140512	-0.0989891	0.128733	NA	0.414479	1.12954
T97710	NA	NA	NA	0.0832134	NA	NA	NA	0.0481202	NA	NA	0.290551	-0.116767	0.32577	NA	0.480329	1.35904
AA057378	NA	NA	-0.415037	-0.7175	NA	NA	-0.527477	-0.69296	NA	NA	-0.705257	-0.665092	NA	NA	-0.14741	0.365149
AA057378	-0.654613	NA	-0.681074	-0.752907	NA	NA	-0.446761	-0.658914	NA	NA	-0.658425	-0.655999	-0.00927781	NA	-0.0947782	0.215966
W69906	-0.171404	NA	NA	NA	NA	NA	NA	-0.428932	NA	NA	0.12749	NA	NA	NA	-0.218137	-0.161411
W69906	-0.0219704	NA	NA	-0.0636002	NA	NA	0.20672	-0.186984	NA	NA	-0.00365702	NA	NA	NA	-0.387498	-0.156663
W80637	0.274631	0.644367	0.0410551	0.615937	0.506043	1.22155	0.025091	0.895341	0.49103	1.68476	1.03053	1.59562	-0.549258	NA	-2.24286	-0.882615
W80637	0.332711	0.700103	0.134766	0.653769	0.503232	1.20252	0.0319429	0.934931	0.615228	0.385571	1.08014	1.53551	-0.850666	NA	-1.91201	-0.906975
AA682613	-0.616671	-0.579373	-0.572993	-0.629698	NA	NA	-0.373515	-0.586798	NA	NA	-0.420719	-0.269582	0.359603	0.596644	0.328457	0.456332
AA682613	-0.391247	NA	-0.591759	-0.593774	NA	NA	-0.286803	-0.619541	NA	NA	-0.373783	-0.19174	0.369234	0.691314	0.449684	0.35468
AA670438	-0.391048	-0.738286	-0.182926	-0.240337	-0.112286	NA	-0.17872	-0.294753	NA	NA	-0.0900322	-0.309043	0.26342	-0.0379679	0.42785	-0.267364
AA670438	-0.335038	-0.572081	-0.152792	-0.198573	NA	NA	-0.221724	-0.362694	-0.129511	NA	-0.0526646	-0.364011	0.119372	0.0262315	0.236543	-0.191215
AA036956	NA	NA	NA	NA	NA	NA	NA	NA	NA	NA	-0.0931094	-0.184809	NA	NA	NA	NA
AA036956	NA	NA	NA	NA	NA	NA	NA	NA	NA	NA	-0.214125	-0.209973	NA	NA	NA	NA
AA039231	-0.120054	-0.665219	NA	-0.847137	0.183278	-0.367899	NA	-0.858494	-0.117026	0.648087	-0.529218	-0.507732	-0.120816	NA	0.0954888	0.832966
AA039231	-0.0227396	-0.656729	NA	-0.916099	0.279484	-0.335508	NA	-0.804038	-0.244772	0.716355	-0.523045	-0.445717	0.234465	NA	0.238691	0.809702
AA111969	-0.140092	-0.491536	-0.167786	-0.31805	0.149514	-0.253103	-0.240108	-0.598436	-0.274422	0.778949	-0.123374	-0.227876	0.0587224	-0.163499	0.159517	-0.168009
AA111969	-0.191555	-0.607076	-0.132046	-0.295271	0.140604	-0.296344	-0.159576	-0.535361	-0.154155	0.648565	0.0516497	-0.306275	0.109955	-0.302927	-0.038775	-0.247953
AA668959	NA	-0.662893	NA	NA	-0.022634	-0.329279	NA	NA	-0.125531	0.441579	NA	NA	NA	NA	NA	NA
AA668959	-0.276524	-0.638317	NA	NA	-0.0211905	-0.192078	NA	NA	-0.272414	0.489543	-0.0332762	NA	NA	NA	NA	NA
28	-0.156472	-0.589146	NA	NA	-0.0830053	-0.244449	NA	NA	-0.152558	0.523562	NA	NA	NA	NA	NA	NA
28	-0.301083	-0.808782	NA	NA	-0.0746632	-0.241573	NA	NA	0.00500647	0.572347	NA	NA	NA	NA	NA	NA
AA496032	-0.289311	-0.718913	-0.723538	-0.715237	-0.0823867	-0.232847	-0.643285	-0.659515	-0.0432318	0.51746	-0.487025	-0.355419	0.284542	NA	-0.514889	-0.158262
AA496032	-0.280169	-0.748134	-0.476771	-0.738856	-0.0336636	-0.204774	-0.735641	-0.672318	-0.0109503	0.601471	-0.701421	-0.310801	0.335349	NA	-0.0267364	-0.313633
AA133212	-0.421079	-0.515131	-0.766873	-0.645206	-0.122284	-0.279834	-0.543032	-0.663762	-0.14375	-0.267579	-0.689196	-0.2882	0.309112	0.17901	0.35073	-0.147459
AA133212	-0.476753	-0.655686	-0.755756	-0.67864	0.0243667	-0.159443	-0.523019	-0.677562	-0.11048	0.529009	-0.669659	-0.387369	0.340591	0.157474	0.30462	-0.112075
AA633811	-0.420038	NA	NA	-0.11171	-0.0646091	NA	0.037769	-0.269398	-0.128733	1.02449	-0.0871984	-0.00741747	0.137504	0.719549	-0.167727	1.06402
AA633811	-0.360124	NA	-0.223008	-0.102263	NA	NA	-0.0116347	-0.404675	NA	0.654433	-0.258665	-0.226509	NA	1.07952	-0.129137	1.14517
AA425336	-0.445199	-0.0191088	NA	-0.254997	-0.202607	-0.133125	NA	-0.757023	-0.115477	0.706371	NA	NA	NA	NA	NA	NA
AA425336	-0.373124	NA	NA	0	-0.106022	-0.542596	-0.0191088	-0.759866	-0.259494	NA	NA	NA	NA	NA	NA	NA
AA676836	-0.64561	-0.718795	-0.656878	-1.03562	-0.14066	-0.479352	-0.505891	-1.05889	-0.214125	0.15337	-1.18458	-1.02041	NA	NA	0.314434	0.554125
AA676836	-0.465806	-0.680799	-1.05889	-1.07496	-0.0596688	-0.414136	-0.659925	-1.16135	-0.152003	0.428334	-1.311	-1.02117	NA	NA	0.306576	0.493959
AA682851	-0.242784	-0.605235	-0.461322	-0.482337	-0.146133	-0.401981	-0.239752	-0.525774	NA	0.568322	-0.169736	-0.190351	-0.0140824	-0.454452	0.241462	-0.109986
AA682851	-0.335249	-0.740613	-0.348424	-0.417865	0.157681	NA	-0.258764	-0.610584	NA	0.302404	-0.206929	-0.234142	-0.0142907	-0.327763	0.0104631	-0.145325
N29844	0.163914	-0.18168	-0.710303	-0.891967	-0.155178	-0.600069	-0.885541	-1.17571	-0.250902	0.391163	-0.552964	-0.524227	NA	NA	-0.653824	-0.052058
N29844	0.138118	-0.236981	-0.864032	-0.928867	-0.0435414	-0.565597	-0.769317	-1.20732	-0.32569	0.276669	-0.573827	-0.469783	NA	NA	-0.49228	0.0187459
AA019549	NA	NA	NA	NA	NA	NA	NA	NA	NA	NA	NA	NA	0.656413	NA	0.631052	0.7361
AA019549	NA	NA	NA	NA	NA	NA	NA	NA	NA	NA	NA	NA	0.59773	0.0840643	0.450237	0.68896
EMPTY	NA	NA	NA	NA	NA	NA	NA	NA	NA	NA	NA	NA	NA	NA	NA	NA
EMPTY	NA	NA	NA	NA	NA	NA	NA	NA	NA	NA	NA	NA	NA	NA	NA	NA
EMPTY	NA	NA	NA	NA	NA	NA	NA	NA	NA	NA	NA	NA	NA	NA	NA	NA
EMPTY	NA	NA	NA	NA	NA	NA	NA	NA	NA	NA	NA	NA	NA	NA	NA	NA
EMPTY	NA	NA	NA	NA	NA	NA	NA	NA	NA	NA	NA	NA	NA	NA	NA	NA
EMPTY	NA	NA	NA	NA	NA	NA	NA	NA	NA	NA	NA	NA	NA	NA	NA	NA
EMPTY	NA	NA	NA	NA	NA	NA	NA	NA	NA	NA	NA	NA	NA	NA	NA	NA
EMPTY	NA	NA	NA	NA	NA	NA	NA	NA	NA	-0.247553	NA	NA	NA	NA	NA	NA
EMPTY	-0.0471274	NA	NA	NA	NA	NA	NA	NA	NA	0.320637	NA	NA	NA	NA	NA	NA
EMPTY	0.1105	NA	NA	NA	NA	NA	NA	NA	NA	0.129868	NA	NA	NA	NA	NA	NA
EMPTY	0.0983021	NA	NA	NA	NA	0.159199	NA	NA	NA	NA	NA	NA	NA	NA	NA	NA
EMPTY	-0.0692627	NA	NA	NA	NA	NA	NA	NA	NA	NA	NA	NA	NA	NA	NA	NA
EMPTY	0.102581	NA	NA	NA	NA	NA	NA	NA	NA	NA	NA	NA	NA	NA	NA	NA
EMPTY	0.0909802	NA	NA	NA	NA	NA	NA	NA	NA	NA	NA	NA	NA	NA	NA	NA
EMPTY	0.056443	NA	NA	NA	NA	NA	NA	NA	NA	0.329568	NA	NA	NA	NA	NA	NA
EMPTY	0.0740619	-0.196773	NA	NA	NA	NA	NA	NA	NA	NA	NA	NA	NA	NA	NA	NA
T57069	-0.250303	-0.694124	0.039024	0.0302923	0.202302	-0.285946	0.0493237	-0.135358	-0.194235	0.364496	0.108138	-0.363527	-0.117324	NA	0.051156	-0.83088
T57069	-0.259915	-0.911463	0.145228	0.0907902	0.144862	-0.273278	-0.00703112	-0.0833009	-0.317509	0.258723	0.0590465	-0.500148	-0.18726	NA	0.105263	-0.562304
H12338	-0.000976443	-0.603906	-0.515899	-0.833539	0.218019	-0.317362	-0.332209	-1.19716	-0.167473	0.49742	-0.557482	-0.622415	NA	NA	-0.127319	0.790042
H12338	-0.116706	-0.727758	-0.592032	-0.808099	0.297022	-0.282849	-0.414146	-1.14406	-0.149544	0.434071	-0.383489	-0.568775	NA	NA	-0.132156	0.784271
H23979	-0.0211257	-0.51098	NA	NA	0.353959	-0.233242	NA	NA	-0.160097	0.421398	NA	NA	NA	NA	NA	NA
H23979	0.00047024	-0.653153	NA	NA	0.362798	-0.277179	NA	NA	-0.102331	0.410404	NA	NA	NA	NA	NA	NA
AA156560	0.0178941	-0.686937	0.0705243	-0.078242	0.259365	-0.29395	0.132879	-0.372586	-0.112148	0.474775	0.195499	-0.13649	0.149576	0.116275	0.718108	0.179003
AA156560	-0.095148	-0.805449	-0.016859	-0.108857	0.265148	-0.279175	0.127643	-0.303841	-0.124837	0.486184	0.166376	-0.113803	0.109328	0.171005	0.535142	0.293928
R63528	0.010075	-0.37335	-0.404433	NA	0.433203	-0.455139	NA	-0.393233	-0.298051	0.442677	-0.00927781	-0.350606	NA	NA	-0.109896	-0.463656
R63528	-0.0535066	-0.47881	-0.108476	-0.172061	0.411938	-0.435062	NA	-0.969168	-0.143492	0.633849	-0.112031	-0.355452	NA	NA	-0.162166	-0.471072
T90375	-0.454145	-0.633769	NA	NA	-0.190742	NA	NA	-0.811555	NA	NA	NA	NA	NA	NA	-0.197446	-0.242857
T90375	-0.372981	-0.766093	NA	NA	NA	-0.172061	NA	-0.792287	NA	NA	NA	NA	NA	NA	NA	-0.0238467
N49224	-0.423646	-0.732871	-0.748709	-0.587952	0.039181	-0.179534	-0.815575	-0.605316	-0.188005	0.691704	-0.206355	-0.22768	0.212545	0.0793535	0.304643	0.0619106
N49224	-0.331668	-0.642174	-0.714167	-0.450302	0.236149	-0.177673	-0.581672	-0.57183	-0.170808	0.710974	-0.238326	-0.216139	0.186496	0.0597062	0.294848	0.0071164
H51765	-0.06953	-0.686506	-1.22921	-0.998849	-0.177705	-0.634095	-1.0893	-0.277044	-0.421626	-0.080039	-0.803199	-0.920139	-3.26956	-3.3011	-3.27183	-4.54637
H51765	-0.13411	-0.624311	-1.29772	-0.852306	-0.181545	-0.663939	-1.16049	-0.769114	-0.474763	-0.0932551	-0.831006	-0.873214	-3.14684	-3.35755	-3.44067	-4.57574
EMPTY	NA	NA	NA	NA	NA	NA	NA	NA	NA	NA	NA	NA	NA	NA	NA	NA
EMPTY	NA	NA	NA	NA	NA	NA	NA	NA	NA	NA	NA	NA	NA	NA	NA	NA
EMPTY	NA	NA	NA	NA	NA	NA	NA	NA	NA	NA	NA	NA	NA	NA	NA	NA
EMPTY	NA	NA	NA	NA	NA	NA	NA	NA	NA	NA	NA	NA	NA	NA	NA	NA
EMPTY	NA	NA	NA	NA	NA	NA	NA	NA	NA	NA	NA	NA	NA	NA	NA	NA
EMPTY	NA	NA	NA	NA	NA	NA	NA	NA	NA	NA	NA	NA	NA	NA	NA	NA
EMPTY	NA	NA	NA	NA	NA	NA	NA	NA	NA	NA	NA	NA	NA	NA	NA	NA
EMPTY	NA	NA	NA	NA	NA	NA	NA	NA	NA	NA	NA	NA	NA	NA	NA	NA
EMPTY	NA	NA	NA	NA	NA	NA	NA	NA	NA	NA	NA	NA	NA	NA	NA	NA
EMPTY	NA	NA	NA	NA	NA	NA	NA	NA	NA	NA	NA	NA	NA	NA	NA	NA
EMPTY	NA	NA	NA	NA	NA	NA	NA	NA	NA	NA	NA	NA	NA	NA	NA	NA
EMPTY	NA	NA	NA	NA	NA	NA	NA	NA	NA	NA	NA	NA	NA	NA	NA	NA
EMPTY	NA	NA	NA	NA	NA	NA	NA	NA	NA	NA	NA	NA	NA	NA	NA	NA
EMPTY	NA	NA	NA	NA	NA	NA	NA	NA	NA	NA	NA	NA	NA	NA	NA	NA
EMPTY	NA	NA	NA	NA	NA	NA	NA	NA	NA	0.379632	NA	NA	NA	NA	NA	NA
EMPTY	NA	NA	NA	NA	NA	NA	NA	NA	NA	0.106042	NA	NA	NA	NA	NA	NA
H79138	-0.293774	-0.302184	NA	NA	-0.0286207	-0.167786	NA	-0.00480099	NA	NA	-0.217872	NA	NA	NA	-0.0795203	-0.440066
H79138	-0.244612	-0.364807	NA	NA	0.136765	-0.275235	NA	-0.604071	0.0784063	NA	-0.291463	NA	NA	NA	-0.167786	-0.298658
H57717	-0.382009	-0.0658021	NA	NA	NA	NA	NA	NA	NA	NA	NA	NA	NA	NA	NA	NA
H57717	-0.241904	NA	NA	NA	NA	NA	NA	NA	NA	NA	NA	NA	NA	NA	NA	NA
AA126760	-0.514933	NA	NA	NA	NA	NA	NA	-0.68147	NA	NA	0	NA	NA	NA	NA	NA
AA126760	NA	NA	NA	NA	NA	NA	NA	-0.724929	NA	NA	NA	NA	NA	NA	NA	NA
H72187	-0.185436	-0.591897	0.0379356	0.125997	0.177334	0.134608	0.227674	-0.0281933	0.182294	0.704944	0.0724677	0.178559	0.476333	1.13022	0.566043	1.19938
H72187	-0.298125	-0.671973	0.00256024	0.124203	0.229667	0.0138451	0.161183	-0.020143	0.212097	0.685477	0.0954168	0.127363	0.53793	1.13763	0.58988	1.24161
H71857	-0.158369	-0.166472	-0.719584	-0.193246	0.138531	-0.241772	NA	-0.726214	0.429429	1.10665	0.0838606	0.0291463	NA	NA	-0.119909	NA
H71857	-0.141065	-0.104876	-0.707218	-0.263034	0.128605	-0.205985	NA	-0.611075	0.347554	1.07305	0.0628936	-0.0318254	NA	NA	-0.0658021	NA
N59057	0.349212	0.300823	0.0775094	0.382944	0.939558	0.353055	0.195787	-0.0623706	0.924503	1.49745	0.798366	0.446029	-0.187627	0.115477	-0.367248	0.377244
N59057	0.504643	0.220085	-0.0268952	0.0810366	0.831116	0.41879	0.32321	-0.133816	1.06994	1.67981	0.812622	0.424741	-0.131744	0.176323	-0.342572	0.46997
W93717	NA	NA	NA	NA	NA	NA	NA	NA	NA	NA	NA	NA	NA	NA	-0.613532	NA
W93717	NA	NA	NA	NA	NA	NA	NA	NA	NA	NA	NA	NA	NA	NA	-0.647698	NA
N63941	-0.157474	-0.39805	-0.154886	-0.422233	0.149824	-0.299334	-0.0885939	-0.823749	-0.579013	0.447138	-0.379041	-0.516501	NA	NA	-0.193115	-0.130106
N63941	-0.149338	-0.346048	-0.447459	-0.687061	0.110323	-0.352847	-0.163499	-1.02756	-0.24323	NA	-0.427718	-0.514573	NA	NA	-0.292253	-0.0450097
R68626	NA	NA	NA	NA	NA	NA	NA	NA	NA	-0.0890377	NA	NA	NA	NA	-0.382206	NA
R68626	NA	NA	NA	NA	NA	NA	NA	NA	NA	NA	NA	NA	NA	NA	NA	NA
T95804	-0.181389	-0.421807	-0.59773	NA	0.0472461	-0.460207	-0.222392	-1.13532	-0.0931094	NA	-0.499062	NA	NA	NA	-0.115477	0.179821
T95804	-0.345913	-0.500375	-0.765535	-0.675063	0.186344	-0.441705	-0.568843	-1.01911	-0.0823053	NA	-0.561165	-0.568843	NA	NA	-0.15056	0.146565
N95780	-0.543831	-0.518378	-0.25497	-0.380452	0.0967211	-0.251849	-0.395754	-0.629183	-0.313075	0.114984	-0.13962	-0.500002	0.235857	0.374578	0.517132	0.81357
N95780	-0.5027	-0.676749	-0.181954	-0.487665	0.0342199	-0.263783	-0.370164	-0.599	-0.472151	0.121294	-0.0255819	-0.477693	0.291483	0.384664	0.579774	0.770976
R62780	-0.28829	-0.458174	-0.63975	-1.08035	0.237416	NA	NA	-1.11442	0.372156	-0.62722	-0.119909	NA	NA	NA	-0.578536	-1.46188
R62780	-0.273376	-0.428002	-0.619365	-0.710761	0.215563	NA	NA	-0.995183	0.237395	NA	-0.299858	-0.106572	NA	NA	-0.568843	-1.50213
R43867	-0.441807	-0.60345	NA	-0.286881	0.034669	-0.3198	NA	-0.983027	-0.215804	0.334528	-0.842979	-0.713696	0.520689	0.600127	0.62144	0.612329
R43867	-0.382209	-0.598516	NA	-0.653824	0.0449474	-0.262473	NA	-0.960107	-0.254134	0.440266	-0.720771	-0.734077	0.548227	0.92139	0.592868	0.761267
H15429	-0.139979	-0.0631499	NA	-0.146221	0.21016	-0.177201	NA	-0.785875	-0.106665	0.5404	-0.0781434	-0.239541	0.31034	NA	0.578401	1.67283
H15429	-0.129116	-0.220564	NA	-0.282934	0.1275	-0.119768	NA	-0.604532	-0.16547	0.664746	-0.164016	-0.32722	0.344828	0.429393	0.478599	1.55217
AA670382	-0.403298	-0.62938	-0.241008	-0.241093	0.13713	-0.258055	-0.160616	-0.399996	-0.0176263	0.0506596	-0.0764373	-0.112908	0.236147	0.286881	0.184778	1.23074
AA670382	-0.224248	-0.606955	-0.341616	-0.209572	-0.0687352	-0.191347	-0.0454828	-0.442677	0.0372394	0.0778521	-0.123526	-0.198079	0.0285692	0.581774	0.0949649	1.07035
W69178	-0.133125	NA	NA	NA	NA	NA	NA	-0.450661	NA	NA	NA	NA	NA	NA	NA	NA
W69178	-0.0143553	NA	NA	NA	NA	NA	NA	-0.450661	NA	NA	NA	NA	NA	NA	NA	NA
AA702544	-0.191505	-0.518432	-0.619684	-0.816209	0.113382	-0.640192	-0.495643	-1.20616	-0.49169	-0.7569	-0.433231	-0.707819	NA	NA	NA	NA
AA702544	-0.138033	-0.571081	-0.604071	-0.910277	0.222129	-0.614852	-0.689961	-1.19853	-0.446783	NA	-0.47063	-0.842644	NA	NA	NA	NA
R38291	NA	-0.330412	NA	NA	0.0109158	-0.294743	NA	-0.443607	-0.0285692	NA	-0.458079	-0.146221	NA	NA	NA	NA
R38291	-0.148073	-0.39869	NA	NA	0.020699	-0.329308	NA	NA	-0.124782	NA	-0.431072	-0.111031	NA	NA	NA	NA
R41996	-0.251539	-0.286661	NA	NA	-0.0426443	NA	NA	NA	NA	NA	-0.154886	NA	NA	NA	0.0749621	NA
R41996	-0.185374	-0.184809	NA	NA	0.0879709	NA	NA	NA	NA	NA	-0.222392	NA	NA	NA	NA	NA
H78349	0.260678	0.0798375	0.153157	0.19785	0.723579	0.360332	0.320112	-0.0644487	0.258953	1.41131	0.192174	0.41022	NA	NA	1.77657	2.05165
H78349	0.183181	0.136758	0.146841	0.341037	0.719207	0.459119	0.489676	-0.0400774	0.368025	1.23648	0.133378	0.305009	NA	0.0612002	1.77719	1.93638
AA074535	-0.0486006	-0.303731	-0.158561	-0.310929	0.329236	-0.112561	-0.0570632	-0.729352	-0.368092	0.298393	-0.0685871	-0.259055	NA	NA	0.0106946	-0.642152
AA074535	-0.0893595	-0.283984	-0.110759	-0.288207	0.259583	-0.0484046	-0.163367	-0.529485	-0.344733	0.39562	-0.142019	-0.298911	NA	NA	-0.125734	-0.55881
AA292382	-0.572398	-0.339704	-0.414327	-0.45435	-0.0182356	-0.193115	-0.17397	-0.628118	0.024641	0.361486	0.0122914	-0.196939	NA	-0.306171	0.162638	0.0313904
AA292382	-0.363299	-0.250914	-0.36343	-0.446738	-0.0183484	-0.162436	-0.19282	-0.684539	0.0759063	0.440071	-0.0748872	-0.12255	0.0270302	-0.257427	-0.271027	0.0317089
AA001536	-0.472458	-0.59644	-0.63743	-0.652077	-0.101041	-0.202722	-0.457933	-0.731183	-0.25045	0.35904	-0.422388	-0.435449	-0.15056	NA	-1.39193	-1.04503
AA001536	-0.464506	-0.776949	-0.49774	-0.549258	0.0761599	-0.449507	-0.339437	-0.796366	-0.115477	0.164094	-0.452391	-0.451989	-0.363638	NA	-1.53937	-1.06467
W68396	-0.352418	-0.353047	-0.4397	-0.545697	0.205099	-0.0292617	-0.431213	-0.504675	-0.161029	0.532628	-0.283878	-0.296393	-0.373944	0.0118416	-0.575795	-0.176731
W68396	-0.353618	-0.413094	-0.474809	-0.566525	0.228699	-0.0325679	-0.346403	-0.642371	-0.142726	0.535629	-0.352672	-0.183243	NA	0.0915766	-0.441261	-0.214066
H90075	-0.245112	-0.518155	NA	-0.193246	0.200134	0.197868	NA	-0.106572	-0.0582302	0.356694	-0.0918389	-0.162686	0.0519521	NA	0.11304	0.355935
H90075	-0.277411	-0.622393	NA	NA	0.114724	0.0934269	NA	-0.408465	-0.0913478	0.285091	-0.103534	-0.113512	0.172061	NA	0.195971	0.317231
AA405751	-0.141012	NA	NA	NA	NA	NA	NA	NA	NA	NA	NA	NA	NA	NA	NA	NA
AA405751	-0.268996	NA	NA	NA	NA	NA	NA	NA	NA	NA	NA	NA	NA	NA	NA	NA
AA056096	NA	NA	NA	NA	NA	NA	NA	NA	NA	NA	NA	NA	NA	NA	NA	NA
AA056096	NA	NA	NA	NA	NA	NA	NA	NA	NA	NA	NA	NA	NA	NA	NA	NA
AA018613	-0.192362	-0.324525	NA	NA	0.121534	-0.0612002	NA	-0.719549	-0.201959	NA	-0.372317	NA	NA	NA	0.436529	0.63894
AA018613	-0.120919	-0.0963021	NA	NA	0.0775686	NA	NA	-0.710761	NA	NA	-0.363883	NA	0.0658021	NA	0.293264	0.719812
R53810	0.0466501	-0.135076	NA	-0.0565835	0.417955	0.276362	NA	-0.686223	0.0257101	NA	-0.462526	-0.0703893	NA	NA	0.205959	0.361375
R53810	0.104445	0.00421225	NA	NA	0.339057	0.172735	NA	-0.751934	0.0452809	NA	-0.491916	-0.0379679	NA	NA	0.589788	0.449927
R28254	NA	NA	NA	NA	NA	NA	NA	NA	NA	NA	NA	NA	NA	NA	NA	NA
R28254	NA	NA	NA	NA	NA	NA	NA	NA	NA	NA	NA	NA	NA	NA	NA	NA
N51009	-0.0332762	NA	NA	NA	NA	NA	NA	NA	NA	NA	NA	NA	NA	NA	NA	NA
N51009	0.0658246	NA	NA	NA	NA	NA	NA	NA	NA	NA	NA	NA	NA	NA	NA	NA
R91823	-0.02665	-0.525357	-0.253194	-0.372789	0.245696	-0.197522	-0.0134775	-0.615336	-0.0328347	0.160951	-0.19874	-0.449179	NA	NA	0.206012	0.979022
R91823	0.0549665	-0.493249	-0.216059	-0.337328	0.135655	-0.232531	-0.0759489	-0.712423	-0.133343	0.441307	-0.26529	-0.359184	NA	NA	0.228097	0.883486
R39951	-0.116341	-0.520311	-0.373051	-0.464299	0.0898002	0.197483	-0.859983	-0.387762	-0.221966	0.0828808	-0.0127312	-0.490116	0.2333	0.347326	0.0214885	0.35156
R39951	-0.249725	-0.400662	-0.268541	-0.487229	0.0739782	0.253666	-0.883003	-0.416928	-0.148389	-0.059176	-0.00771772	-0.507919	0.183663	0.349839	0.0566846	0.28888
T62655	0.00313289	NA	NA	NA	NA	NA	NA	NA	NA	NA	NA	NA	NA	NA	NA	NA
T62655	-0.0643906	NA	NA	NA	NA	NA	NA	NA	NA	NA	NA	NA	NA	NA	NA	NA
T60063	-0.319943	-0.803928	-0.676543	-0.740869	-0.0207703	-0.481521	-0.263239	-1.05953	-0.298066	0.302644	-0.562377	-0.62998	0.101312	0.601816	0.238585	0.405804
T60063	-0.492202	-0.737501	-0.6988	-0.865968	0.11563	-0.481679	-0.407954	-0.992084	-0.297204	-0.534513	-0.536806	-0.577602	0.11714	0.584963	0.157654	0.382464
T55704	NA	NA	NA	NA	NA	NA	NA	NA	NA	NA	NA	NA	NA	NA	NA	NA
T55704	-0.0565835	NA	NA	NA	NA	NA	-0.106572	NA	NA	NA	NA	NA	NA	NA	NA	NA
AI360085	-0.393624	-0.470773	NA	-0.352382	-0.116868	-0.619203	NA	-1.24525	-0.385306	NA	-1.09803	-1.03491	NA	NA	-0.429774	0.40439
AI360085	-0.475028	-0.436777	NA	-0.356144	-0.135501	-0.64426	NA	-1.42867	-0.379346	0.199179	-1.10441	-0.953252	NA	NA	-0.600215	0.468169
AI365334	-0.24667	-0.232331	NA	NA	-0.119415	-0.32662	NA	NA	-0.375509	NA	-0.843821	NA	NA	NA	NA	NA
AI365334	-0.150617	-0.186769	NA	NA	-0.056338	-0.246915	NA	NA	-0.2741	NA	-0.759837	-0.0795203	NA	NA	NA	NA
AI299969	0.256843	NA	NA	NA	0.522725	NA	NA	NA	0.00958605	NA	NA	NA	NA	NA	NA	NA
AI299969	0.261476	NA	NA	NA	0.485427	NA	NA	NA	0.411426	NA	0.0931094	NA	NA	NA	NA	NA
AI302883	0.0842387	-0.32069	-0.311359	-0.5491	0.382794	-0.480501	-0.101321	-0.870814	-0.13495	0.402153	-0.106447	-0.522732	NA	NA	0.174188	-0.852533
AI302883	0.118918	-0.311295	-0.188529	-0.485992	0.388037	-0.42584	-0.139163	-0.912116	-0.129962	0.451079	-0.195537	-0.44219	NA	NA	-0.100739	-0.874181
AA482035	-0.183271	-0.399611	-0.643522	-0.41051	0.054582	-0.182454	-0.471357	-0.608864	-0.210351	0.664483	-0.540512	-0.27374	-0.441946	-1.17839	-0.469042	-1.13246
AA482035	-0.230456	-0.389484	-0.624542	-0.429251	-0.0122927	-0.24147	-0.346069	-0.593984	-0.15087	0.60654	-0.455633	-0.302948	-0.448822	-1.15896	-0.44817	-1.1581
AA706967	0.35373	0.132307	NA	NA	0.895303	0.285283	NA	0.205861	0.599289	NA	-0.125271	-0.120782	NA	NA	1.78241	2.10236
AA706967	0.315461	0.189695	NA	NA	0.909126	0.129017	NA	0.116379	0.545968	NA	-0.0667416	-0.0822011	NA	NA	1.73118	2.01892
AA704226	-0.400844	-0.661382	-0.152201	0.117809	0.123855	-0.135196	0.244871	-0.14505	-0.197796	0.344229	0.0417777	0.0281969	NA	0.0749621	0.148464	0.250776
AA704226	-0.365601	-0.68347	-0.073084	0.110316	0.0608089	-0.213347	0.276452	-0.147182	-0.41304	0.508775	0.0649554	0.0196455	-0.0983551	NA	0.170306	0.285362
AA700773	-0.242504	-0.379476	NA	-0.314213	-0.0393934	NA	NA	-0.676705	-0.236366	NA	NA	NA	NA	NA	-0.0285692	NA
AA700773	-0.163367	-0.542916	-0.341037	-0.696109	-0.154429	-0.453173	-0.84108	-1.08891	-0.321285	NA	NA	NA	NA	NA	NA	NA
N62311	-0.330493	-0.374124	-0.154034	0.00315343	0.123944	0.260063	-0.0644075	0.0425977	0.237953	1.00166	0.0854355	0.345443	NA	NA	-0.311678	0.0858299
N62311	-0.208125	-0.44416	-0.12608	-0.0284004	0.275141	0.297034	0.0253853	0.0511043	0.304423	0.839594	0.103442	0.237297	NA	NA	-0.295113	0.120976
N51740	-0.0667488	-0.509091	NA	NA	NA	NA	0	-0.246915	NA	NA	NA	NA	NA	NA	NA	NA
N51740	-0.101984	-0.230181	-0.0332762	NA	0.0391706	NA	-0.27077	-0.0426443	NA	NA	NA	NA	NA	NA	NA	NA
N49196	-0.160053	-0.689547	-0.440768	-0.259021	-0.240314	-0.50696	-0.516861	-0.857117	NA	-0.21747	-0.698959	-0.684071	NA	NA	-0.425817	-0.85599
N49196	-0.237165	-0.74825	-0.306839	-0.254997	-0.0376923	-0.441838	-0.618252	-0.910995	-0.325657	0.170095	-0.642889	-0.552541	NA	NA	-0.0749621	-0.860867
N48361	-0.0143553	NA	NA	NA	NA	NA	NA	NA	NA	NA	NA	NA	NA	NA	NA	NA
N48361	-0.0726037	NA	NA	NA	NA	NA	NA	NA	NA	NA	NA	NA	NA	NA	NA	NA
AI474891	NA	NA	NA	NA	NA	NA	NA	NA	NA	NA	NA	NA	NA	NA	NA	NA
AI474891	NA	NA	NA	NA	NA	NA	NA	NA	NA	NA	NA	NA	NA	NA	NA	NA
AI400452	-0.551343	-0.625956	-0.0426443	-0.655628	0.00561725	-0.519185	NA	-0.517974	-0.0637967	0.366489	-0.281198	-0.146248	NA	NA	-0.0612002	NA
AI400452	-0.430869	-0.619896	-0.163499	-0.515788	0.0300572	-0.666601	NA	-0.566659	-0.132733	0.753531	-0.25889	-0.147193	NA	NA	0.018859	NA
AA680350	-0.375765	-0.581131	NA	NA	-0.00958605	-0.137504	NA	-1.26903	-0.0565835	NA	-0.230613	NA	NA	NA	NA	NA
AA680350	-0.329357	-0.686297	NA	NA	NA	-0.47854	NA	-1.43934	-0.468149	NA	NA	NA	NA	NA	NA	NA
H83924	-0.895241	-1.47105	NA	-0.9855	-0.649649	-0.938989	-0.512648	-1.91746	-0.985837	NA	-0.933878	-1.21826	0.0223678	NA	0.0794714	-0.795657
H83924	-0.875029	-1.46761	NA	-0.887525	-0.653589	-1.12009	-0.389567	-1.85415	-1.04046	NA	-1.00207	-1.14405	-0.0684251	NA	-0.146038	-0.723892
AA504514	-0.1133	NA	NA	NA	NA	NA	NA	-0.263034	NA	NA	-0.34861	NA	NA	NA	NA	NA
AA504514	-0.288699	NA	NA	NA	NA	NA	NA	NA	NA	NA	-0.337235	NA	NA	NA	NA	NA
AA707909	-0.504772	-0.739451	-0.298658	-0.347923	-0.0141253	-0.288798	-0.260016	-0.363737	-0.204963	0.586634	-0.240051	-0.0582556	0.401862	NA	0.413397	0.476234
AA707909	-0.266433	-0.418521	-0.422233	-0.363245	0.044048	-0.0904222	-0.192645	-0.331179	-0.0368653	0.127513	-0.208505	-0.166846	0.383884	0.159199	0.665395	0.586469
AA456845	0.0853561	-0.318309	0.109878	-0.0409829	0.735922	-0.0547658	0.314766	-0.461223	-0.222895	0.564992	0.396748	-0.142122	0.385493	0.776587	1.04914	2.05244
AA456845	0.0055069	-0.336062	0.17308	-0.0142803	0.686592	-0.0489668	0.329903	-0.464907	-0.295731	0.500157	0.404562	-0.0950472	0.414752	0.714977	1.07524	1.94118
AA410299	NA	NA	NA	NA	NA	NA	NA	NA	NA	NA	-0.263034	NA	NA	NA	NA	NA
AA410299	0.0144512	NA	NA	NA	NA	NA	NA	NA	-0.0379679	NA	-0.389567	NA	NA	NA	NA	NA
T90067	-0.290818	-0.00480099	NA	NA	0.0143553	NA	NA	NA	NA	NA	-0.543674	NA	NA	NA	NA	NA
T90067	-0.281182	NA	NA	NA	NA	NA	NA	NA	NA	NA	-0.299034	NA	NA	NA	NA	NA
AI024035	-0.6417	-0.665207	-1.14628	-1.39159	-0.220898	-0.653824	-1	-1.44671	-0.542469	-0.103777	-0.949485	-0.977583	0.255635	-0.172131	0.280506	-0.790671
AI024035	-0.494251	-0.813549	-1.10076	-1.38431	0.0467365	-0.701323	-0.870598	-1.48304	-0.49288	-0.035569	-1.03633	-0.980713	0.248697	-0.0893309	0.240916	-0.57138
AI089149	-0.409963	NA	0.0172191	-0.0457311	NA	NA	-0.0474353	-0.210155	NA	NA	0.0365773	-0.205283	NA	NA	NA	NA
AI089149	-0.216461	NA	0.00295938	-0.109896	NA	NA	-0.0873158	-0.253155	NA	NA	0.0292646	-0.0767258	NA	NA	NA	NA
AA971498	-0.269505	NA	NA	NA	NA	NA	NA	NA	NA	NA	NA	NA	NA	NA	NA	NA
AA971498	-0.344063	NA	NA	NA	NA	NA	NA	NA	NA	-0.743459	NA	NA	NA	NA	NA	NA
EMPTY	NA	NA	NA	NA	NA	NA	NA	NA	NA	NA	NA	NA	NA	NA	NA	NA
EMPTY	NA	NA	NA	NA	NA	NA	NA	NA	NA	NA	NA	NA	NA	NA	NA	NA
EMPTY	NA	NA	NA	NA	NA	NA	NA	NA	NA	NA	NA	NA	NA	NA	NA	NA
EMPTY	NA	NA	NA	NA	NA	NA	NA	NA	NA	NA	NA	NA	NA	NA	NA	NA
EMPTY	NA	NA	NA	NA	NA	NA	NA	NA	NA	NA	NA	NA	NA	NA	NA	NA
EMPTY	NA	NA	NA	NA	NA	NA	NA	NA	NA	NA	NA	NA	NA	NA	NA	NA
EMPTY	NA	NA	NA	NA	NA	NA	NA	NA	NA	NA	NA	NA	NA	NA	NA	NA
EMPTY	NA	NA	NA	NA	NA	NA	NA	NA	NA	NA	NA	NA	NA	NA	NA	NA
EMPTY	NA	NA	NA	NA	NA	NA	NA	NA	NA	NA	NA	NA	NA	NA	NA	NA
EMPTY	NA	NA	NA	NA	NA	NA	NA	NA	NA	NA	NA	NA	NA	NA	NA	NA
EMPTY	NA	NA	NA	NA	NA	NA	NA	NA	NA	NA	NA	NA	NA	NA	NA	NA
EMPTY	NA	NA	NA	NA	NA	NA	NA	NA	NA	-0.15945	NA	NA	NA	NA	NA	NA
EMPTY	NA	NA	NA	NA	NA	NA	NA	NA	NA	NA	NA	NA	NA	NA	NA	NA
EMPTY	NA	NA	NA	NA	NA	NA	NA	NA	NA	NA	NA	NA	NA	NA	NA	NA
EMPTY	NA	NA	NA	NA	-0.128733	NA	NA	NA	NA	-0.379472	NA	NA	NA	NA	NA	NA
EMPTY	NA	NA	NA	NA	NA	NA	NA	NA	NA	NA	NA	NA	NA	NA	NA	NA
EMPTY	NA	NA	NA	NA	NA	NA	NA	NA	NA	NA	NA	NA	NA	NA	NA	NA
EMPTY	NA	NA	NA	NA	NA	NA	NA	NA	NA	NA	NA	NA	NA	NA	NA	NA
EMPTY	NA	NA	NA	NA	NA	NA	NA	NA	NA	-0.704993	NA	NA	NA	NA	NA	NA
EMPTY	NA	NA	NA	NA	NA	NA	NA	NA	NA	NA	NA	NA	NA	NA	NA	NA
EMPTY	NA	NA	NA	NA	NA	NA	NA	NA	NA	NA	NA	NA	NA	NA	NA	NA
EMPTY	NA	NA	NA	NA	NA	NA	NA	NA	NA	NA	NA	NA	NA	NA	NA	NA
EMPTY	NA	NA	NA	NA	NA	NA	NA	NA	NA	NA	NA	NA	NA	NA	NA	NA
EMPTY	NA	NA	NA	NA	NA	NA	NA	NA	NA	NA	NA	NA	NA	NA	NA	NA
6HG	-0.630766	NA	NA	NA	NA	NA	NA	NA	NA	NA	NA	NA	NA	NA	0.433619	0.180267
6HG	-0.365845	-0.0703893	NA	NA	NA	NA	NA	NA	NA	NA	NA	NA	NA	NA	0.381494	0.0881664
6HG	-0.617384	NA	NA	NA	NA	NA	NA	NA	NA	NA	NA	NA	NA	NA	0.0733981	NA
6HG	-0.57299	NA	NA	NA	-0.0840643	NA	NA	NA	NA	NA	NA	NA	NA	NA	0.413182	NA
6DR	NA	NA	NA	NA	NA	NA	NA	NA	NA	NA	NA	NA	NA	NA	NA	NA
6DR	NA	NA	NA	NA	NA	NA	NA	NA	NA	NA	NA	NA	NA	NA	NA	NA
6DR	NA	NA	NA	NA	NA	NA	NA	NA	NA	NA	NA	NA	NA	NA	NA	NA
6DR	NA	NA	NA	NA	NA	NA	NA	NA	NA	NA	NA	NA	NA	NA	NA	NA
3Reserved	NA	NA	NA	NA	NA	NA	NA	NA	NA	NA	NA	NA	NA	NA	NA	NA
3Reserved	NA	NA	NA	NA	NA	NA	NA	NA	NA	NA	NA	NA	NA	NA	NA	NA
3Reserved	NA	NA	NA	NA	NA	NA	NA	NA	NA	NA	NA	NA	NA	NA	NA	NA
3Reserved	NA	NA	NA	NA	NA	NA	NA	NA	NA	NA	NA	NA	NA	NA	NA	NA
2DR	NA	NA	NA	NA	NA	NA	NA	NA	NA	NA	NA	NA	NA	NA	NA	NA
2DR	NA	NA	NA	NA	NA	NA	NA	NA	NA	NA	NA	NA	NA	NA	NA	NA
2DR	NA	NA	NA	NA	NA	NA	NA	NA	NA	-0.17742	NA	NA	NA	NA	NA	NA
2DR	NA	NA	NA	NA	NA	NA	NA	NA	NA	NA	NA	NA	NA	NA	NA	NA
EMPTY	NA	NA	NA	NA	NA	NA	NA	NA	NA	-0.0408723	NA	NA	NA	NA	NA	NA
EMPTY	NA	NA	NA	NA	NA	NA	NA	NA	NA	NA	NA	NA	NA	NA	NA	NA
EMPTY	NA	NA	NA	NA	NA	NA	NA	NA	NA	NA	NA	NA	NA	NA	NA	NA
EMPTY	NA	NA	NA	NA	NA	NA	NA	NA	NA	NA	NA	NA	NA	NA	NA	NA
EMPTY	NA	NA	NA	NA	NA	NA	NA	NA	NA	NA	NA	NA	NA	NA	NA	NA
EMPTY	NA	NA	NA	NA	NA	NA	NA	NA	NA	NA	NA	NA	NA	NA	NA	NA
EMPTY	NA	NA	NA	NA	NA	NA	NA	NA	NA	NA	NA	NA	NA	NA	NA	NA
EMPTY	NA	NA	NA	NA	NA	NA	-0.326676	NA	NA	NA	NA	NA	NA	NA	NA	NA
EMPTY	NA	NA	NA	NA	NA	NA	NA	NA	NA	NA	NA	NA	NA	NA	NA	NA
EMPTY	NA	NA	NA	NA	NA	NA	NA	NA	NA	NA	NA	NA	NA	NA	NA	NA
EMPTY	NA	NA	NA	NA	NA	NA	NA	NA	NA	NA	NA	NA	NA	NA	NA	NA
EMPTY	NA	NA	NA	NA	NA	NA	NA	NA	NA	NA	NA	NA	NA	NA	NA	NA
EMPTY	NA	NA	NA	NA	NA	NA	NA	NA	NA	NA	NA	NA	NA	NA	NA	NA
EMPTY	NA	NA	NA	NA	NA	NA	NA	NA	NA	NA	NA	NA	NA	NA	NA	NA
EMPTY	NA	NA	NA	NA	NA	NA	NA	NA	NA	NA	NA	NA	NA	NA	NA	NA
EMPTY	NA	NA	NA	NA	NA	NA	NA	NA	NA	NA	NA	NA	NA	NA	NA	NA
2PC	-0.341434	NA	NA	NA	NA	NA	NA	-0.641046	NA	NA	NA	NA	NA	NA	NA	-0.00958605
2PC	-0.0332762	NA	NA	NA	NA	NA	NA	NA	NA	NA	NA	NA	NA	NA	NA	NA
2PC	-0.221632	-0.329602	-0.128733	-0.254997	0.0256106	NA	-0.184809	-0.901468	NA	NA	-0.0976108	NA	NA	NA	-0.140102	-0.495695
2PC	-0.275153	-0.512648	-0.286881	-0.32577	0.28364	NA	NA	-0.743986	NA	NA	-0.0976108	-0.532695	NA	NA	-0.269367	-0.49228
3HG	-0.562006	-0.713387	-0.0749621	-0.576997	-0.055754	0.0129681	-0.408216	-0.299107	-0.239512	-0.0635029	-0.360933	-0.26687	0.0829452	0.0934072	0.126469	0.0761457
3HG	-0.161172	-0.755955	-0.115477	-0.341849	0.0424769	-0.178642	-0.316528	-0.442155	-0.223312	0.209977	-0.272355	-0.330965	0.0928676	0.108912	0.122552	-0.00933032
3HG	-0.332167	-0.582045	NA	-0.61766	-0.201983	-0.0527705	0.134381	-0.353727	-0.314746	0.296825	-0.218001	-0.347658	0.0681873	0.075149	0.111072	0.0195421
3HG	-0.259855	-0.7951	NA	-0.108501	0.0412573	-0.0703893	-0.213821	-0.484098	-0.169517	0.238734	-0.244381	-0.301691	0.168554	0.148835	0.219966	-0.00124747
10HG	NA	NA	NA	NA	NA	NA	NA	NA	NA	NA	NA	NA	NA	NA	NA	NA
10HG	NA	NA	NA	NA	NA	NA	NA	NA	NA	NA	NA	NA	NA	NA	NA	NA
10HG	NA	NA	NA	NA	NA	NA	NA	NA	NA	-0.124645	NA	NA	NA	NA	NA	NA
10HG	NA	NA	NA	-1.2002	NA	NA	NA	NA	NA	NA	NA	NA	NA	NA	NA	NA
4RC	NA	NA	NA	NA	NA	NA	NA	NA	NA	-0.315565	NA	NA	NA	NA	NA	NA
4RC	NA	NA	NA	NA	NA	NA	NA	NA	NA	NA	NA	NA	NA	NA	NA	NA
4RC	NA	NA	NA	NA	NA	NA	NA	NA	NA	NA	NA	NA	NA	NA	NA	NA
4RC	NA	NA	NA	NA	NA	NA	NA	NA	NA	NA	NA	NA	NA	NA	NA	NA
AA857212	-0.384885	NA	-0.281494	-0.517984	NA	NA	-0.243114	-0.316564	NA	NA	-0.134176	-0.208733	0.0992379	NA	-0.261847	-0.503464
AA857212	-0.48866	-0.710761	0.0415791	-0.334714	-0.0708213	NA	-0.338309	-0.250962	NA	NA	-0.102999	-0.442599	0.0363418	NA	-0.0726995	-0.450984
AA894557	-0.495587	-0.404177	-0.064518	-0.0921836	0.197446	NA	0.299459	-0.0833971	NA	-0.393233	-0.09198	0.038146	0.065663	0.499102	0.129325	0.952939
AA894557	-0.364572	-0.763377	0.00336528	-0.0108183	NA	NA	0.124608	-0.0628008	NA	0.40748	-0.00796129	0.017087	0.0959057	0.581753	0.0353886	1.00512
AA845156	NA	NA	NA	NA	NA	NA	NA	NA	NA	NA	NA	NA	NA	NA	NA	NA
AA845156	NA	NA	NA	NA	NA	NA	NA	NA	NA	NA	NA	NA	NA	NA	NA	0
AA844998	NA	NA	-0.0931094	NA	NA	NA	NA	NA	NA	NA	NA	NA	NA	NA	NA	-0.254997
AA844998	NA	NA	-0.407806	-0.176323	NA	NA	NA	NA	NA	NA	NA	NA	NA	NA	NA	-0.20581
AA877194	-0.561731	-0.961894	-0.680886	-0.579792	-0.256323	-0.513447	-0.426144	-0.654577	-0.365219	0.39536	-0.383446	-0.404647	0.723778	0.77613	0.894437	0.60822
AA877194	-0.673249	-0.873885	-0.891472	-0.484951	-0.164728	-0.607683	-0.49357	-0.641083	-0.431856	0.421033	-0.423093	-0.319426	0.741492	0.691935	0.901475	0.726417
AA872602	-0.102098	NA	-0.332052	-0.30569	NA	NA	-0.219566	-0.356144	NA	NA	-0.201634	NA	NA	NA	-0.193246	-0.0956246
AA872602	NA	NA	-0.285534	-0.336616	NA	NA	-0.350907	-0.613532	NA	NA	-0.201634	-0.275007	NA	NA	-0.267036	-0.0957893
AA872001	-0.630104	-0.977808	-0.236756	-0.134537	-0.0665808	-0.465873	0.0614911	-0.254577	-0.225856	-0.393914	-0.159048	-0.0378905	-0.632606	-1.08678	-0.330166	-1.11963
AA872001	-0.606016	-0.977871	-0.239854	-0.115627	-0.0476931	-0.496686	0.0296735	-0.238437	-0.206399	0.415467	-0.174402	-0.0505288	-0.623931	-1.1571	-0.401675	-1.11253
AA256304	NA	NA	-0.589021	-0.690045	NA	NA	-0.475273	-0.684071	NA	NA	NA	NA	NA	NA	-0.559084	-0.499102
AA256304	NA	NA	-0.669027	-0.850666	NA	NA	-0.500285	-0.871844	NA	NA	NA	-0.267036	NA	NA	-0.263034	-0.641546
AA404619	-0.22063	-0.849998	-0.593694	-0.549652	NA	-0.551826	-0.49155	-1.00908	-0.230298	0.183266	-0.28434	-0.381202	-0.772129	0.0237595	-0.914883	-0.373286
AA404619	-0.225009	-0.83818	-0.684142	-0.717222	-0.162105	-0.645392	-0.499571	-0.96283	-0.435249	NA	-0.168701	-0.490058	-0.718721	0.0748972	-0.677091	-0.229188
AA010400	NA	NA	-0.0840643	NA	NA	NA	-0.0874628	-0.581753	NA	NA	NA	NA	-0.278976	NA	-1.05658	-1.28491
AA010400	NA	NA	-0.447138	NA	NA	NA	-0.221857	-0.736966	NA	NA	NA	NA	-0.250962	NA	-1.27501	-1.26504
H13691	-0.0874628	-0.415037	-0.431432	-0.650639	NA	NA	-0.328871	-0.68012	NA	NA	-0.383787	-0.267143	NA	NA	-0.0795203	-0.00480099
H13691	-0.173536	-0.529405	-0.423907	-0.453027	NA	NA	-0.306103	-0.691329	NA	0.370007	-0.232523	-0.305111	NA	NA	-0.106572	NA
H15085	0.378512	NA	2.82363	2.63656	NA	NA	2.30756	1.87294	NA	-0.146221	1.04731	1.32193	2.2193	2.35802	1.35426	2.76956
H15085	1.01673	NA	2.7223	2.70108	0.176323	NA	2.22159	1.98982	NA	NA	1.57046	1.01673	2.45768	2.48027	1.03562	2.72196
AA490466	1.97151	1.86867	1.89593	1.54267	1.94486	0.47854	1.63797	0.184809	NA	0.193246	NA	NA	NA	0.106572	-0.0931094	2.21007
AA490466	1.995	1.91659	1.84122	1.51525	2.13969	0.47854	1.78368	0.545968	0.0519521	0.286881	NA	NA	NA	0.447138	-0.176323	1.86099
R09069	-0.509317	-0.59136	-0.840183	-0.868755	-0.0519521	NA	-0.670514	-1.19409	-0.0519521	0.277311	-0.867731	-0.648429	-0.395801	-0.100137	-0.311071	-0.510945
R09069	-0.502311	-0.337235	-0.996937	-0.943497	NA	NA	-0.814785	-1.36528	NA	NA	-0.818337	-0.744883	-0.385473	-0.0920482	-0.446987	-0.483083
T98887	-0.100784	-0.87709	-0.0308513	-0.223866	NA	NA	-0.0285207	-0.879335	NA	NA	-0.0542616	-0.278815	-0.247438	NA	-0.351472	-0.829173
T98887	-0.220561	-0.562344	-0.0358115	-0.21267	NA	NA	-0.0304784	-0.81749	NA	NA	-0.156988	-0.30064	-0.131627	NA	-0.446222	-0.869213
N34827	NA	NA	-0.206617	-0.405964	NA	NA	-0.461247	-0.607134	NA	NA	-0.261046	-0.299383	-0.301591	-0.8101	-0.314856	-1.02032
N34827	-0.163499	NA	-0.210686	-0.36977	NA	NA	-0.253937	-0.599398	NA	NA	-0.326104	-0.370531	-0.204631	-0.931053	-0.146429	-0.965866
H49592	-0.381409	-0.429393	-0.0482552	-0.203151	-0.122857	NA	-0.429211	-0.584963	NA	-0.278366	-0.288046	-0.449971	0.0840643	NA	-0.0976108	-0.111031
H49592	-0.241955	-0.505891	-0.163746	-0.165737	-0.0594649	0.0519521	-0.275774	-0.68938	NA	-0.442669	-0.216152	-0.404343	0.106572	NA	-0.167786	NA
R01139	-0.27208	-0.675603	-0.29852	-0.0609299	0.0172053	0.167337	-0.00519243	-0.0957629	0.081897	0.919396	-0.128646	0.103769	-0.101457	-0.0320516	0.00604904	0.0233586
R01139	-0.333267	-0.808422	-0.260281	0.0305813	0.0727774	-0.0287802	-0.0133956	-0.143524	-0.165448	0.674417	-0.102218	0.130159	-0.0969997	-0.0120371	0.025827	-0.00428354
AA418683	NA	NA	-0.207646	-0.242673	NA	NA	-0.071161	-0.298427	NA	-0.475085	-0.0350672	-0.117807	1.00496	NA	1.28701	0.407798
AA418683	NA	NA	-0.191569	-0.170136	NA	NA	0.0721866	-0.486782	NA	NA	0.00248099	-0.105456	1.03827	NA	1.32169	0.502086
R14855	-0.274681	NA	-0.278301	-0.258838	-0.00409275	NA	-0.076572	-0.599858	NA	NA	-0.135171	-0.148167	-0.672269	-0.807913	-0.685714	-0.872528
R14855	-0.136502	NA	-0.302379	-0.243797	NA	NA	-0.199486	-0.492798	NA	NA	-0.234771	-0.188614	-0.715697	-0.865741	-0.719425	-0.888853
AA812996	NA	NA	NA	NA	NA	NA	NA	-0.298658	NA	NA	NA	NA	NA	NA	NA	-0.167786
AA812996	NA	NA	-0.0658021	NA	NA	NA	-0.0238467	NA	NA	NA	NA	NA	NA	NA	-0.172061	-0.246915
AA707545	NA	NA	NA	NA	NA	NA	NA	-0.133125	NA	NA	NA	NA	NA	NA	-0.382206	-0.742725
AA707545	NA	NA	NA	NA	NA	NA	NA	NA	NA	NA	NA	NA	NA	NA	-0.425817	-0.728283
AA705225	NA	NA	NA	NA	NA	NA	NA	-0.0976108	NA	NA	NA	NA	NA	NA	-0.180572	-0.436517
AA705225	NA	NA	NA	NA	NA	NA	NA	-0.429393	NA	NA	NA	NA	NA	NA	-0.0191088	-0.356144
AA775738	0.339425	NA	-0.00527494	NA	NA	NA	-0.0923451	-0.470511	NA	NA	NA	NA	1.34902	0.970129	1.06605	0.524359
AA775738	0.408307	NA	0.0921498	-0.110183	NA	NA	0.0162651	-0.399307	NA	NA	NA	NA	1.40786	0.942228	1.11047	0.552299
W86776	0.385768	0.151762	0.0887364	0.190354	0.427659	0.249949	0.17281	-0.199487	0.185895	0.791288	-0.0536779	0.145407	0.142426	1.27742	0.393693	1.01687
W86776	0.364911	0.152688	0.0629796	0.201876	0.530968	0.179868	0.193148	-0.120934	0.0414327	0.804878	-0.0487689	0.0638741	0.206147	1.31219	0.208602	0.932481
AA598758	-0.124922	-0.772761	-0.536407	-0.611243	0.0203752	-0.560715	-0.412971	-0.93848	-0.493815	0.192038	-0.564587	-0.630938	-1.6606	-0.568843	-1.78876	-2.55041
AA598758	-0.246416	-0.797569	-0.558962	-0.59786	0.0128114	0.0623484	-0.376501	-0.987821	-0.0699626	-0.0351537	-0.528845	-0.655784	-1.55905	-0.745596	-2.13476	-2.60355
AA521453	0.0304027	-0.553219	-0.164679	-0.265725	-0.00718953	-0.0372111	-0.670384	-0.665142	-0.407861	-0.465753	-0.0266054	-0.591583	-0.434975	-0.78799	-0.403629	-0.666463
AA521453	-0.00152103	-0.580799	-0.156889	-0.335935	0.0361823	-0.0308374	-0.606352	-0.696585	-0.690023	-0.499524	0.0355299	-0.582408	-0.406511	-0.921997	-0.313776	-0.625173
AA062993	-0.0700218	-0.510724	-0.391039	-0.270982	0.192902	-0.269461	-0.517622	-0.683131	-0.218087	0.117271	-0.412709	-0.327798	-0.0919649	-0.159424	0.0786392	-0.226035
AA062993	-0.129412	-0.51673	-0.327497	-0.360432	0.159892	-0.0764858	-0.321275	-0.654141	-0.208176	0.305303	-0.418545	-0.334507	0.0123069	-0.193009	0.018219	-0.160784
R39148	-0.478047	-0.422233	-0.927128	-0.85333	-0.141869	NA	-1.01563	-1.36551	NA	NA	-0.471621	-0.549258	NA	NA	-0.246915	-0.471621
R39148	-0.301509	-0.825321	-1.00624	-1.08267	NA	NA	-0.94073	-1.27103	-0.0612002	0.0473057	-0.429393	-0.49228	-0.0703893	NA	-0.532733	-0.773996
AA099394	-0.209827	NA	-0.583477	-0.263034	NA	NA	-0.499306	-0.623279	NA	NA	-0.292722	-0.650058	-0.191481	-0.047949	-0.523562	-0.414469
AA099394	0.112853	NA	-0.449742	-0.594549	NA	NA	-0.580346	-0.407806	NA	NA	-0.381429	-0.565223	-0.138501	0.0104771	-0.4299	-0.580231
AA464256	-1.90175	NA	-0.073849	-0.329602	NA	NA	-0.0981804	-0.115477	NA	NA	0.0531579	-0.209614	-0.404177	NA	-1.32009	-0.849256
AA464256	-0.0426443	NA	-0.00440518	-0.338374	NA	NA	-0.286541	-0.238787	NA	NA	-0.0600376	-0.069902	-0.481988	NA	-1.01263	-1.13495
R38198	NA	NA	-0.318076	NA	NA	NA	-0.349807	-0.0931094	NA	NA	-0.124328	NA	NA	NA	NA	NA
R38198	NA	NA	-0.461179	NA	NA	NA	-0.398866	-0.436517	NA	NA	NA	NA	NA	NA	-0.294743	-0.263034
H63361	0.102098	NA	-0.0325938	-0.0995357	NA	NA	-0.201959	-0.347019	NA	NA	0.227952	-0.157204	1.25298	1.45593	0.742725	1.38613
H63361	0.242857	NA	-0.0246621	0.0103173	NA	NA	-0.28982	-0.379934	NA	NA	0.162553	-0.266473	1.41323	1.45418	1.19465	1.27707
H62396	NA	NA	-0.0749621	-0.0332762	NA	NA	-0.172061	-0.454176	NA	NA	NA	NA	NA	NA	-0.555816	-0.632268
H62396	NA	NA	-0.271027	-0.230613	NA	NA	NA	-0.695994	NA	NA	NA	NA	NA	NA	-0.454176	-0.713696
AA015914	NA	NA	NA	NA	NA	NA	NA	-0.137504	NA	NA	NA	NA	NA	NA	NA	NA
AA015914	NA	NA	NA	NA	NA	NA	NA	NA	NA	NA	NA	NA	NA	NA	NA	NA
AA485748	NA	NA	-0.00958605	-0.290818	NA	NA	-0.298658	-0.0658021	NA	NA	NA	NA	NA	NA	NA	-0.102098
AA485748	NA	NA	NA	-0.282934	NA	NA	-0.341037	-0.704872	NA	-0.926998	NA	NA	NA	NA	-0.259021	-0.0976108
AA292536	-0.145851	-0.448164	-0.569788	-0.528468	NA	NA	-0.219705	NA	NA	-0.0827047	-0.350558	-0.398652	NA	NA	NA	0.850666
AA292536	-0.220126	-0.461179	-0.355204	-0.385694	NA	NA	-0.144724	NA	NA	0.364875	-0.301081	-0.335547	NA	NA	NA	1
AA454146	NA	NA	-0.0949253	-0.124545	NA	NA	-0.0816385	-0.354971	NA	-0.252187	0.190471	-0.466781	NA	NA	-0.404036	-0.590218
AA454146	NA	NA	-0.0300886	-0.169186	NA	NA	-0.0340676	-0.537175	NA	NA	-0.024453	-0.491999	NA	NA	-0.226899	-0.675434
AA477781	-0.0385019	-0.726624	-0.307799	-0.448056	0.212231	-0.299797	-0.240856	-0.925295	-0.282074	0.503641	-0.372737	-0.608601	1.30438	1.06383	1.42672	0.792731
AA477781	0.00747959	-0.74801	-0.349297	-0.428334	0.179276	-0.378512	-0.0372578	-0.893578	-0.447459	0.410211	-0.306351	-0.578668	1.41927	1.05187	1.31155	0.793033
AA447774	-0.287735	-0.478314	-0.18439	-0.0829923	0.0320272	-0.119527	-0.230342	-0.201897	-0.0794345	0.748616	-0.0233745	0.277289	-0.234258	0.33599	-0.401701	0.368712
AA447774	-0.389499	-0.553362	-0.23595	-0.138353	0.0251648	0.0178564	-0.143004	-0.171727	-0.0307435	0.877999	-0.0144512	0.235401	-0.22052	0.343973	-0.317894	0.314645
AA280692	NA	NA	NA	NA	NA	NA	NA	NA	NA	NA	NA	NA	NA	NA	NA	NA
AA280692	NA	NA	NA	NA	NA	NA	NA	NA	NA	NA	NA	NA	NA	NA	NA	NA
AA397824	-0.0267903	-0.409054	-0.40576	-0.346056	0.0400774	NA	-0.231047	-0.484857	0.0335171	0.524329	-0.382383	-0.27227	0.253588	0.857687	0.277295	2.2257
AA397824	-0.136834	-0.62214	-0.270778	-0.290561	0.0263404	-0.264273	-0.279639	-0.550931	-0.179594	0.58966	-0.319645	-0.171266	0.211994	0.914357	0.305366	2.09898
AA486533	-0.0287829	-0.263034	-0.724659	-0.600891	NA	NA	-0.518862	-0.81634	NA	NA	-0.368735	-0.338294	-0.243201	-0.179144	-0.62293	NA
AA486533	-0.287175	-0.81284	-0.720683	-0.588327	NA	NA	-0.440241	-0.819846	NA	NA	-0.0188063	-0.453257	-0.176739	-0.195819	-0.393233	-0.689358
AA279429	NA	NA	NA	NA	NA	NA	NA	NA	NA	NA	NA	NA	NA	NA	NA	NA
AA279429	NA	NA	NA	NA	NA	NA	NA	NA	NA	NA	NA	NA	NA	NA	NA	NA
R40790	-0.287608	-0.790692	-0.669006	-0.587067	-0.306661	NA	-0.451607	-0.740774	NA	NA	-0.422233	-0.539459	-0.461179	NA	-0.59773	-1.22578
R40790	-0.233431	-0.860663	-0.64946	-0.597979	-0.287098	NA	-0.35579	-0.719739	NA	0.139046	-0.450661	-0.447613	-0.475085	NA	-0.306457	-1.29123
H22856	NA	NA	-0.783304	-0.468149	NA	NA	-0.512951	-0.443607	NA	NA	-0.607232	-0.549258	NA	NA	NA	NA
H22856	NA	NA	-0.681367	-0.650765	NA	NA	-0.556223	-0.572081	NA	NA	-0.568843	-0.528379	NA	NA	-0.189034	NA
T73468	0.185274	-0.210342	0.589517	0.549375	0.779521	0.596234	0.714401	0.517751	0.556011	NA	0.289507	0.342344	0.520603	0.549258	0.11589	0.918572
T73468	0.203092	-0.116008	0.627607	0.579924	0.777608	0.640458	0.706991	0.476037	0.396769	1.08171	0.194311	0.37927	0.470801	0.582009	0.468006	0.816554
AA449831	-0.172061	NA	-0.828435	-0.972779	NA	NA	-0.526979	-0.903004	NA	NA	-0.29873	-0.260081	-0.0191088	NA	NA	-1.13532
AA449831	-0.133125	NA	-0.863938	-0.804347	NA	NA	-0.398866	-0.951637	NA	0.13493	-0.361159	-0.372645	-0.0795203	NA	NA	-1.18692
AA486233	-0.236517	-0.581972	-0.616107	-0.307453	-0.06501	NA	-0.396333	-0.720595	NA	0.119654	-0.318978	-0.195375	-0.318183	-0.259423	-0.583174	-0.621915
AA486233	-0.105895	-0.878255	-0.592821	-0.493748	-0.124447	NA	-0.452703	-0.769948	NA	0.182508	-0.288078	-0.21881	-0.336149	-0.191452	-0.695787	-0.46929
AA026118	NA	NA	NA	NA	NA	NA	0.0143553	NA	NA	NA	NA	NA	NA	NA	NA	NA
AA026118	NA	NA	NA	NA	NA	NA	-0.178235	NA	NA	NA	NA	NA	NA	NA	NA	-0.0795203
AA018457	NA	NA	NA	NA	NA	NA	NA	NA	NA	NA	NA	NA	NA	NA	NA	NA
AA018457	NA	NA	NA	NA	NA	NA	NA	NA	NA	NA	NA	NA	NA	NA	NA	NA
R88267	NA	NA	NA	NA	NA	NA	NA	NA	NA	NA	NA	NA	NA	NA	-0.193246	-0.0191088
R88267	NA	NA	NA	NA	NA	NA	-0.0931094	-0.0931094	NA	NA	NA	NA	NA	NA	-0.242857	-0.0931094
N71782	-0.50794	-1.13873	-0.367007	-0.598457	-0.0743887	-0.722466	-0.426127	-1.09049	-0.448985	-0.261693	-0.360176	-0.619332	-0.893788	-0.422233	-0.657894	-0.368937
N71782	-0.691193	-1.10202	-0.301239	-0.644434	-0.0488122	-0.704176	-0.341885	-0.899732	-0.550329	-0.221979	-0.381731	-0.658235	-0.827102	-0.471663	-0.774522	-0.401881
AA626370	-0.293422	NA	-0.254092	-0.320041	NA	NA	-0.177255	-0.492887	NA	NA	0.0197295	-0.434613	NA	0.0931094	-0.363638	0.111559
AA626370	-0.277704	-0.193246	-0.252739	-0.278067	NA	NA	-0.0768765	-0.408674	NA	0.191566	-0.396438	-0.468969	0.0394084	NA	-0.329602	0.0500155
AA292410	-0.290593	-0.743271	-0.40987	-0.358793	0.00352235	-0.289558	-0.189442	-0.385386	-0.0744782	0.553641	-0.214444	-0.0938703	-0.332432	-1	-0.244564	-1.19443
AA292410	-0.333472	-0.752368	-0.404895	-0.208996	0.0254072	-0.226581	-0.0879022	-0.480367	-0.0674059	0.648545	-0.174834	-0.0941982	-0.322832	-0.954543	-0.309775	-1.09782
H87536	-0.144205	-0.410727	-0.451272	-0.382206	NA	NA	-0.574167	-0.77961	NA	0.10721	-0.32263	-0.338651	NA	NA	NA	NA
H87536	-0.0285692	-0.48288	-0.598637	-0.382206	NA	NA	-0.246239	-0.632268	NA	0.459432	-0.20553	-0.378998	NA	NA	NA	NA
N74623	NA	NA	-0.209973	NA	NA	NA	NA	-0.450661	NA	NA	NA	NA	NA	NA	-0.415037	-0.378512
N74623	NA	NA	NA	NA	NA	NA	NA	-0.600904	NA	NA	NA	NA	NA	NA	-0.321928	-0.0565835
AA424695	NA	NA	-0.458353	-0.406964	NA	NA	-0.357384	-0.651052	NA	NA	-0.0343515	-0.468996	-0.0459862	NA	-0.288157	-0.0737351
AA424695	NA	NA	-0.300721	-0.549557	NA	NA	-0.302781	-0.738703	NA	NA	-0.14618	-0.415671	-0.00293529	NA	-0.267055	-0.205793
AA029934	0.261701	0.191141	-0.56535	-0.451497	-0.0576606	0.0911479	-0.374396	-0.410225	-0.231075	-0.83996	-0.345586	-0.244661	0.657937	0.0307485	-0.0745803	-0.642271
AA029934	0.220769	0.0570733	-0.515823	-0.400365	0.241787	NA	-0.366168	-0.348706	0.149378	0.545086	-0.561669	-0.217221	0.656357	0.123614	0.254465	-0.769066
N30372	NA	NA	-0.499102	NA	NA	NA	-0.176759	NA	NA	NA	0.0703893	NA	NA	NA	NA	NA
N30372	NA	NA	-0.0143553	NA	NA	NA	-0.280987	-0.5963	NA	-0.660514	0.0931094	-0.294743	NA	NA	NA	NA
AA705112	-0.423986	-0.819273	-0.619006	-0.389567	-0.0864148	NA	-0.468769	NA	NA	0.398752	-0.230613	-0.255839	NA	NA	-0.298658	-0.64127
AA705112	-0.300286	-0.798824	-0.478433	-0.422233	-0.0895888	NA	-0.268856	NA	0.0507881	0.413123	-0.263034	-0.305966	NA	NA	-0.137504	-0.417531
AA778919	-0.577838	-0.636993	-0.00384207	0.348501	-0.0125863	1.05977	0.0504165	0.821243	0.334419	0.853346	1.31081	1.06697	-1.15314	NA	-1.16155	-3.10495
AA778919	-0.438149	-0.465664	-0.000676528	0.3281	-0.165164	0.935691	0.0542514	0.888813	0.447188	0.988587	1.26303	1.02073	-1.07555	-0.102098	-1.15015	-3.27918
AA703660	NA	NA	NA	NA	NA	NA	NA	NA	NA	NA	NA	NA	NA	NA	NA	NA
AA703660	NA	NA	NA	NA	NA	NA	NA	NA	NA	NA	NA	NA	NA	NA	NA	NA
AA701860	-0.221979	-0.0332762	-0.438484	-0.425817	NA	NA	-0.399748	-0.184809	NA	NA	-0.517218	-0.445173	NA	NA	NA	0.807355
AA701860	-0.222042	-0.128733	-0.484551	-0.440066	NA	NA	-0.23827	-0.0612002	NA	NA	-0.35837	-0.538488	NA	NA	NA	0.594549
N74524	-0.514573	-0.436517	-0.392204	-0.405122	-0.0840643	NA	-0.250347	-0.695016	-0.0744499	0.0379679	-0.327471	-0.221247	-0.652334	-0.526069	-0.656878	-1.00763
N74524	-0.498976	-0.77961	-0.435938	-0.362955	-0.13245	NA	-0.00484126	-0.838033	NA	0.422736	-0.419177	-0.270348	-0.719163	-0.584963	-0.710761	-0.8647
N49204	0.0287113	-0.78774	-0.170371	-0.26931	NA	NA	-0.20587	-0.817577	NA	0.39689	-0.115975	-0.551436	0.101714	NA	-0.00836347	-0.695145
N49204	0.111278	-0.596146	-0.110525	-0.354617	NA	NA	-0.201888	-0.876517	NA	NA	-0.182562	-0.552434	0.073657	NA	-0.160633	-0.725661
AA394127	-0.374827	-0.722466	-0.581631	-0.499102	-0.0332762	NA	-0.282771	-0.728283	NA	NA	-0.295183	-0.420966	NA	NA	-0.31034	-1.59932
AA394127	-0.28701	-0.725378	-0.481742	-0.496607	-0.0840643	NA	-0.260026	-0.907198	NA	0.518679	-0.336428	-0.415037	-0.0332762	NA	-0.314213	-1.38405
AA757764	-0.359306	-0.626753	-0.162982	-0.0367586	-0.0604992	-0.404177	0.0970091	-0.277307	0.00950187	0.747766	0.075617	0.13393	-0.139858	-0.0985906	-0.0419136	0.0462362
AA757764	-0.333544	-0.704074	-0.10607	-0.0490848	0.0198085	-0.146032	0.194074	-0.308508	NA	-0.0612002	0.205544	0.152518	-0.175333	-0.0682086	-0.124865	0.0565456
N29901	0.110953	-0.103662	-0.663798	-0.57231	0.106215	-0.249092	-0.413215	-0.773254	-0.0909188	0.591639	-0.352235	-0.304104	-0.062937	-0.33261	-0.0889173	-0.721744
N29901	0.151745	-0.0998986	-0.633588	-0.616953	0.133694	-0.166799	-0.52573	-0.701984	-0.187097	0.676252	-0.405383	-0.300568	-0.0458037	-0.352569	-0.162153	-0.69853
AA405800	-0.0410929	-0.386549	0.0384741	-0.0374979	0.353434	0.00265201	0.21548	-0.000722612	0.0949374	0.5846	-0.124812	0.217638	0.567484	1.09769	0.429635	1.21167
AA405800	-0.0113781	-0.46435	0.168749	0.110733	0.352302	0.110842	0.182558	-0.0280001	0.231645	0.735623	-0.109819	0.189835	0.570316	1.08056	0.288188	1.2561
AA455521	-0.582813	-0.644424	-0.975604	-0.939389	-0.403042	-0.370153	-0.779986	-0.955807	-0.506817	0.383895	-0.278301	-0.383704	-0.764908	-0.767957	-1.03033	-1.08478
AA455521	-0.612705	-0.876633	-0.981916	-1.04022	-0.499795	-0.597526	-0.679532	-0.934942	-0.44532	0.51001	-0.370584	-0.378309	-0.73967	-0.724118	-0.717936	-0.998278
AA291749	-1.06544	-1.3797	-1.36309	-1.4655	-0.837176	-1.11241	-1.27049	-1.44436	-0.934149	-0.104595	-0.591073	-0.648534	-2.32887	-2.85363	-2.13926	-3.03478
AA291749	-1.00128	-1.44923	-1.62728	-1.41857	-0.80238	-1.03551	-1.08164	-1.5153	-0.907927	-0.033596	-0.543452	-0.611079	-2.34045	-2.80981	-2.20427	-3.07035
H82891	-0.30441	NA	-0.294285	-0.429036	NA	NA	-0.45864	-0.635281	NA	NA	-0.27876	-0.613721	-0.34034	NA	-0.0063555	-0.557704
H82891	-0.052017	-0.180572	-0.296617	-0.414497	NA	NA	-0.357496	-0.866578	NA	-0.59976	-0.282554	-0.553666	-0.283368	NA	-0.0656713	-0.504963
H77652	0.427838	0.0840643	0.284547	0.22655	0.159199	NA	0.671706	-0.160224	NA	-0.723747	0.29956	0.202138	0.429393	NA	1.10215	1.24206
H77652	0.558934	0.115477	0.328239	0.229823	0.106572	NA	0.65119	-0.115637	NA	NA	0.288103	0.181345	0.757023	0.0379679	1.13398	1.17412
R09691	-0.276925	-0.764362	-0.293783	-0.432691	0.177174	NA	-0.165249	-0.713587	-0.0942636	-0.569934	-0.0918286	-0.349449	0.481547	0.741248	0.617445	0.750827
R09691	-0.281737	-0.813352	-0.227972	-0.337426	0.285885	NA	-0.116343	-0.805836	-0.248562	0.423857	-0.0829494	-0.276451	0.520299	0.764792	0.608609	0.704424
N94921	0.119909	NA	-0.128691	-0.0191088	NA	NA	-0.374808	NA	NA	NA	-0.154886	-0.535892	NA	NA	-0.230613	-0.0786325
N94921	NA	NA	-0.0493277	-0.060121	NA	NA	-0.201345	NA	NA	-0.0558532	-0.133125	-0.432959	NA	NA	-0.193246	-0.475085
N31587	-0.250107	-0.548044	-0.337966	-0.463401	0.0255056	-0.414018	-0.267533	-0.798283	-0.0690603	0.409831	-0.224961	-0.436187	-0.139474	0.435783	0.204334	0.371233
N31587	-0.290349	-0.582643	-0.38879	-0.3614	0.0574588	-0.439015	-0.377555	-0.847418	-0.101374	0.461278	-0.21439	-0.437237	-0.11171	0.512432	0.181004	0.511644
AA868515	NA	NA	NA	NA	NA	NA	NA	NA	NA	NA	NA	NA	NA	NA	-0.263034	-0.271027
AA868515	NA	NA	NA	NA	NA	NA	NA	NA	NA	NA	NA	NA	NA	NA	-0.222392	-0.184809
AA827287	-0.455812	-1.00744	-0.385809	-0.559658	-0.181898	-0.0840643	-0.14711	-0.542342	-0.197376	0.647119	-0.278489	-0.205476	-0.548578	NA	-0.455345	-2.44881
AA827287	-0.457553	-1.09793	-0.395709	-0.521327	-0.212331	-0.33527	-0.122981	-0.444158	-0.208814	0.520875	-0.13923	-0.172618	-0.617854	NA	-0.644135	-2.55826
AA181023	-0.226509	NA	-1.27898	-0.804604	NA	NA	-1.08859	-0.815575	NA	0.177193	NA	-0.584963	NA	NA	-0.400538	-1.54267
AA181023	-0.532733	-0.0749621	-1.3599	-0.776806	NA	NA	-0.882317	-1.04963	NA	NA	NA	-0.656878	NA	NA	-0.5025	-1.33914
AA789301	-0.0892673	NA	-0.591394	-0.410712	NA	NA	-0.458341	-0.457682	NA	NA	0.457682	-0.450661	NA	NA	NA	NA
AA789301	-0.193246	NA	-0.48447	-0.538805	NA	NA	-0.634483	-0.193246	NA	0.179266	0.302563	-0.400538	NA	NA	NA	NA
AA732873	-0.211707	-0.531607	-0.815091	-0.95494	-0.0153166	-0.633263	-0.624816	-1.27667	-0.130508	0.38907	-0.355211	-0.67019	-1.16779	-0.314213	-1.07724	-1.95606
AA732873	-0.207431	-0.534414	-0.92684	-1.08959	0.0874628	-0.754244	-0.629098	-1.20017	-0.102472	0.429406	-0.525169	-0.639177	-1.18481	-0.512648	-1.16779	-1.96224
AA758082	-0.0795103	-0.408963	-0.57697	-0.655508	0.0837794	-0.347625	-0.593462	-0.796827	-0.247581	0.334038	-0.329602	-0.595216	0.279042	0.695994	-0.133125	0.929033
AA758082	-0.123095	-0.422117	-0.529882	-0.694393	-0.0433926	-0.380604	-0.604648	-0.837707	-0.423702	0.480142	-0.435896	-0.532424	0.167727	0.868416	-0.0238467	0.739152
AA778629	NA	NA	NA	NA	NA	NA	NA	NA	NA	NA	NA	NA	NA	NA	NA	NA
AA778629	NA	NA	NA	NA	NA	NA	NA	NA	NA	NA	NA	NA	NA	NA	NA	NA
H22445	1.04031	0.568843	0.762703	0.393233	0.115477	NA	0.793549	NA	NA	0.226509	NA	-0.124328	NA	NA	NA	2.74703
H22445	0.924712	0.644625	0.821294	0.542671	0.271027	NA	0.681074	NA	NA	0.776806	NA	-0.00958605	NA	NA	NA	2.8312
H17512	-0.313617	-0.60756	-0.456123	-0.521607	-0.0795943	-0.423386	-0.490379	-0.808835	-0.354712	NA	-0.399667	-0.423746	0.229828	0.972968	0.161899	0.77825
H17512	-0.369254	-0.591933	-0.501768	-0.539832	0.0149407	-0.415037	-0.473009	-0.749894	-0.373059	0.501904	-0.293289	-0.41832	0.279226	0.937177	0.299743	0.77772
N53172	NA	NA	NA	NA	NA	NA	NA	NA	NA	-0.50104	NA	-0.154886	NA	NA	NA	NA
N53172	NA	NA	-0.0519521	NA	NA	NA	NA	NA	NA	0.562344	NA	-0.0703893	NA	NA	NA	NA
AA479100	-0.243494	-0.252607	-0.613378	-0.621509	-0.089806	-0.704814	-0.906198	-0.832965	-0.0473057	0.175087	-0.62504	-0.407609	0.570205	0.187924	0.566447	-0.0979298
AA479100	-0.317644	-0.478579	-0.709939	-0.595262	-0.101188	-0.399096	-0.529512	-0.843325	-0.580121	0.556566	-0.60464	-0.40466	0.573971	0.156842	0.566761	-0.29434
R93912	-0.489805	-1.19581	-0.855704	-0.88149	-0.238787	NA	-0.682377	-1.09349	-0.180572	0.116988	-0.42312	-0.649761	0.320492	NA	-0.0940332	-0.0658378
R93912	-0.574728	-0.722466	-0.909419	-0.829716	-0.310788	NA	-0.659678	-1.22507	-0.519374	0.27608	-0.453126	-0.634185	0.289801	0.0840643	-0.0173971	-0.102476
R79082	-0.489893	-0.665021	-1.28607	-1.22571	-0.529175	-0.742167	-1.07728	-1.36676	-0.550033	0.0450388	-0.756241	-0.666889	0.313107	0.268379	0.0272669	-0.317629
R79082	-0.387023	-0.781531	-1.24235	-1.20353	-0.543622	-0.928741	-1.05795	-1.41716	-0.712663	0.11144	-0.739502	-0.699613	0.309621	0.184918	0.0866783	-0.352458
R89615	-0.33019	-0.849508	-0.072253	-0.0613039	NA	0.0504651	-0.143396	-0.304525	-0.506614	0.328003	0.188693	-0.11757	-0.142675	NA	0.112517	-1.27573
R89615	-0.351061	-0.793454	0.0049088	-0.088084	0.0290876	NA	-0.173552	-0.374699	-0.159594	0.279604	0.0171898	-0.111645	-0.166803	NA	0.0636586	-1.25569
AA454732	NA	NA	-0.0143553	NA	NA	NA	NA	NA	NA	NA	NA	NA	NA	NA	NA	NA
AA454732	0.00480099	NA	NA	NA	NA	NA	NA	NA	NA	NA	NA	NA	NA	NA	NA	NA
R45102	NA	NA	NA	NA	NA	NA	NA	NA	NA	0.407827	NA	NA	NA	NA	NA	NA
R45102	NA	NA	NA	NA	NA	NA	NA	NA	NA	NA	NA	NA	NA	NA	NA	NA
N50444	-0.144861	-0.33034	-0.315687	-0.293623	0.13451	NA	-0.0471712	-0.531381	-0.0519521	0.45089	-0.231326	-0.547285	-0.612099	NA	-0.719549	-0.827203
N50444	-0.240108	-0.539989	-0.282035	-0.243489	0.125179	NA	-0.136565	-0.522227	-0.214125	0.20581	-0.373043	-0.536501	-0.664673	-0.124328	-0.790772	-0.915663
AA497051	-0.101621	-0.716382	-0.155521	-0.403383	0.421507	-0.387661	0.127177	-0.743945	0.0480833	0.60921	-0.204274	-0.205042	0.102198	-1.36191	-0.00564656	-1.46117
AA497051	-0.162136	-0.679457	-0.144735	-0.401091	0.446096	-0.428865	0.114297	-0.733831	-0.0267237	0.560794	-0.244622	-0.151907	0.108103	-1.40074	0.0467286	-1.50753
H98534	-0.579532	-0.895519	-1.14395	-1.13522	-0.380604	-0.666295	-0.889764	-1.08254	-0.507604	0.617678	-0.431589	0.0489632	0.594395	1.38876	0.467836	1.17615
H98534	-0.572579	-0.846731	-1.24961	-1.14465	-0.646311	-0.481807	-0.842226	-1.09012	-0.408696	0.349977	-0.268785	0.0386716	0.575354	1.44723	0.552114	1.21191
AA126009	-0.0469756	NA	-0.409613	-0.51257	-0.438121	NA	-0.116335	-0.403356	NA	NA	-0.216978	-0.122065	2.16666	-0.44554	2.43779	-0.457124
AA126009	-0.103686	-0.32577	-0.321301	-0.583168	NA	NA	-0.146453	-0.365439	NA	NA	-0.189881	-0.346552	2.26784	-0.455844	2.34488	-0.474631
AA025059	-0.574654	-0.321129	-0.805002	-0.820301	-0.156906	-0.128733	-0.507248	-1.00129	NA	NA	-0.527411	-0.424339	0.932622	NA	0.872108	-0.0909377
AA025059	-0.424315	NA	-0.824729	-0.778558	-0.209973	-0.146221	-0.548741	-0.925058	NA	NA	-0.501505	-0.371151	0.910363	0.163404	0.787596	-0.159073
H15707	NA	NA	-0.580643	-0.551655	NA	NA	-0.642405	-0.785195	NA	NA	-0.835859	-0.446743	0.128457	NA	-0.635367	-0.44591
H15707	0.0232323	NA	-0.43905	-0.536366	NA	NA	-0.662175	-0.783916	NA	NA	-0.800704	-0.636222	-0.010684	0.208279	-0.568411	-0.761087
AA417881	0.408384	0.558421	0.435856	0.834863	0.464132	0.333424	-0.238233	0.537043	0.468434	NA	0.564498	0.872699	-0.635367	NA	-0.78799	-1.38773
AA417881	0.594454	0.670354	0.372269	0.806426	0.557592	0.393233	0.19187	0.677771	0.380031	0.541241	0.548468	0.868007	-0.82103	NA	-0.246915	-1.02148
AA456101	-0.0797482	-0.411453	-0.799674	-0.790077	0.0268238	-0.454313	-0.572251	-0.894452	-0.271694	0.24165	-0.582804	-0.427125	0.600197	NA	-0.174605	0.670248
AA456101	-0.125294	-0.431488	-0.778275	-0.75148	-0.00982097	-0.420332	-0.608328	-0.943577	-0.293292	0.202158	-0.372333	-0.507355	0.537196	NA	-0.229905	0.781582
H50251	NA	NA	NA	NA	NA	NA	NA	NA	NA	NA	-0.119909	-0.0473057	NA	NA	NA	NA
H50251	NA	NA	NA	NA	NA	NA	NA	NA	NA	NA	-0.180035	NA	NA	NA	NA	NA
AA243749	NA	NA	-0.230613	NA	NA	NA	NA	NA	NA	NA	-0.0840643	-0.0749621	NA	NA	NA	NA
AA243749	NA	NA	-0.246915	NA	NA	NA	NA	NA	NA	NA	-0.0749621	-0.159199	NA	NA	NA	NA
N72715	NA	NA	-0.805218	-0.782909	NA	NA	-0.558746	-1.05752	NA	NA	-0.69395	-0.701665	-0.275901	-0.799087	-0.501592	-1.43288
N72715	-0.0931094	NA	-0.772889	-0.828756	NA	NA	-0.57763	-0.973845	NA	NA	-0.64293	-0.730642	-0.225994	-1.08179	-0.568474	-1.43291
H54289	NA	NA	NA	NA	NA	NA	NA	NA	NA	NA	NA	NA	NA	NA	-0.146221	NA
H54289	NA	NA	NA	NA	NA	NA	NA	NA	NA	NA	NA	NA	NA	NA	NA	NA
N49703	0.170846	-0.179658	-0.23376	-0.349329	0.362832	-0.209899	-0.173115	-0.700915	-0.449478	0.467522	-0.0889094	-0.538561	0.798533	1.69437	0.497055	1.51323
N49703	0.0352971	-0.206018	-0.264481	-0.33596	0.341157	-0.105634	-0.193409	-0.737689	-0.488786	0.45691	-0.0426634	-0.444543	0.805871	1.69349	0.346874	1.60073
R08267	NA	NA	0.780687	0.637063	NA	NA	0.588596	0.700228	NA	0.619804	0.0612002	0.766087	NA	NA	NA	NA
R08267	0.180572	NA	0.814898	0.51922	NA	NA	0.540568	0.778485	NA	0.111031	0.218265	0.876056	NA	NA	NA	NA
H82977	-0.414665	-0.628244	0.0577485	0.0600316	0.106999	0	0.106858	-0.108195	0.059882	NA	0.0449875	0.0866972	0.81258	0.780088	1.018	0.736369
H82977	-0.38033	-0.802933	-0.0595382	0.00401147	0.106994	0.0162467	0.118063	-0.127197	-0.00176693	NA	0.140352	0.0970837	0.853071	0.754704	1.07321	0.767514
T88890	NA	NA	-0.280108	-0.693467	NA	NA	-0.418398	-0.911927	NA	NA	-0.261528	-0.69618	NA	NA	NA	NA
T88890	NA	NA	-0.341339	-0.5944	NA	NA	-0.385673	-0.776271	NA	NA	-0.0615878	-0.483933	0.0565835	NA	NA	NA
AA281635	-0.517968	NA	-0.510818	-0.42769	NA	NA	-0.22934	-0.762363	NA	NA	-0.1826	-0.315925	-0.0409651	-0.052595	-0.0613539	-0.133163
AA281635	-0.0379679	NA	-0.713474	-0.548765	NA	NA	-0.31351	-0.74217	NA	NA	-0.219095	-0.218515	-0.0275734	NA	0.0247426	-0.159903
T50675	0.0181855	-0.556849	-0.259375	-0.489206	0.164631	NA	-0.218513	-1.17132	NA	NA	-0.372168	-0.531935	-0.123705	-1.27429	0.0504857	-1.54128
T50675	-0.286772	-0.495695	-0.257053	-0.431498	NA	NA	-0.279972	-1.07842	NA	0.184809	-0.34885	-0.529846	0.0368996	-1.331	0.0757813	-1.56974
AA490300	-0.31975	-0.629307	-0.182928	-0.134717	0.130877	-0.259145	-0.171154	-0.351793	-0.0946904	0.415262	-0.176108	-0.00725338	0.145351	0.399878	0.255125	0.494248
AA490300	-0.262206	-0.635437	-0.0204158	0.0112711	0.0641303	-0.273451	0.010577	-0.305503	0.0817644	-0.218594	-0.0852777	-0.15053	0.0920136	0.34259	0.243231	0.526765
AA428778	NA	NA	-0.282109	-0.315239	NA	NA	-0.251037	-0.492571	NA	NA	-0.241873	-0.0689972	0.147909	0.352789	0.221962	0.0474505
AA428778	NA	NA	-0.380338	-0.288624	NA	NA	-0.245603	-0.40661	NA	NA	-0.34675	-0.0388947	0.186037	0.352433	0.0905348	0.0826633
T55801	-0.357459	NA	-0.658831	-0.548197	NA	NA	-0.401109	-0.625436	NA	NA	-0.40828	-0.282589	-0.122582	0.373591	-0.136936	0.378641
T55801	NA	NA	-0.57621	-0.479673	NA	NA	-0.379845	-0.583063	NA	NA	-0.466734	-0.320192	-0.109132	0.382223	-0.0928332	0.309868
AA425395	-0.321061	-0.0658021	-0.814616	-0.741597	NA	NA	-0.538811	-0.991769	NA	NA	-0.433663	-0.353386	NA	NA	-0.0186157	-0.561194
AA425395	-0.322723	-0.0703893	-0.714171	-0.680134	NA	NA	-0.479668	-0.935668	NA	NA	-0.461568	-0.484534	NA	NA	-0.0339473	-0.600327
AA284856	-0.199732	-0.290818	-0.154215	-0.104057	0.369625	0	0.0850768	-0.367736	NA	NA	0.0295723	-0.00419576	-0.231959	-0.653813	0.0798808	-0.893324
AA284856	-0.154142	NA	-0.128732	-0.0936083	0.0675427	NA	0.0923404	-0.327892	NA	0.168656	0.0885037	0.037237	-0.221081	-0.567996	0.0850744	-0.743336
AA083478	NA	NA	0.230613	NA	NA	NA	0.499102	NA	NA	NA	NA	NA	0.111031	NA	NA	NA
AA083478	NA	NA	0.183514	NA	NA	NA	0.568843	NA	NA	NA	NA	NA	0.176323	NA	NA	NA
H45967	NA	NA	NA	NA	NA	NA	NA	NA	NA	-0.363638	NA	NA	NA	NA	-0.0658021	-0.91584
H45967	NA	NA	NA	NA	NA	NA	NA	NA	NA	NA	NA	NA	NA	NA	-0.400538	NA
T54462	NA	NA	1.3367	1.18741	NA	NA	1.1501	1.03335	NA	NA	0.371759	0.799303	0.897886	0.15056	0.00480099	1.69732
T54462	NA	NA	1.45579	1.12338	NA	NA	1.14832	1.05562	NA	NA	0.179786	0.439821	0.938599	0.32577	0.572081	1.77451
W58658	NA	NA	NA	NA	NA	NA	NA	NA	NA	-0.290818	NA	NA	NA	NA	NA	-0.141869
W58658	NA	NA	NA	NA	NA	NA	NA	NA	NA	NA	NA	NA	NA	NA	-0.124328	-0.495695
AA156632	NA	NA	-0.0976108	-0.209973	NA	NA	-0.348426	NA	NA	NA	-0.278976	-0.344828	NA	NA	NA	NA
AA156632	NA	NA	-0.246915	-0.675063	NA	NA	-0.359139	NA	NA	NA	-0.31034	-0.31034	NA	NA	NA	NA
AA460282	-0.471336	-1.07714	-0.829841	-1.17199	-0.216411	-0.851739	-0.490733	-1.44355	-0.323194	0.220408	-0.600718	-0.784777	0.635317	NA	0.440972	0.237359
AA460282	-0.505489	-1.16317	-0.834576	-1.15525	-0.0438876	-0.961984	-0.490157	-1.46575	-0.250659	0.211794	-0.620514	-0.740271	0.60738	NA	0.463947	0.20835
AA464578	-1.36134	-2.11533	-1.31596	-1.47011	-0.693808	-1.37942	-0.812736	-1.54671	-0.897173	-0.156915	-0.732945	-0.723854	-0.79786	-0.845323	-1.00685	-1.98342
AA464578	-1.41758	-1.81149	-1.27028	-1.45164	-0.674419	-1.48373	-0.698891	-1.55382	-0.912308	-0.149481	-0.733277	-0.697286	-0.801402	-1.1177	-0.811053	-1.93074
AA463926	NA	NA	NA	-0.124958	NA	NA	-0.364914	-0.293645	NA	NA	NA	NA	NA	NA	NA	NA
AA463926	NA	NA	NA	-0.419826	NA	NA	-0.207233	-0.450742	NA	NA	NA	NA	NA	NA	NA	NA
AA489011	NA	NA	-0.25634	-0.299894	NA	NA	-0.2361	-0.319641	NA	NA	-0.234521	0.140731	0.166683	0.608139	0.290743	0.717488
AA489011	NA	NA	-0.430047	-0.283631	NA	NA	-0.216143	-0.412569	NA	NA	-0.276687	0.147385	0.256131	0.573613	0.296483	0.698216
AA454673	NA	NA	-0.424047	-0.284453	NA	NA	0.0227834	-0.379414	NA	NA	NA	NA	-0.193106	0.39689	-0.537243	0.0554443
AA454673	NA	NA	-0.25099	-0.11141	NA	NA	-0.0227394	-0.342531	NA	NA	NA	-0.0426443	-0.249581	0.657693	-0.275957	-0.0682128
AA418564	NA	NA	-1.20876	-1.51404	NA	NA	-1.0013	-2.09089	NA	-0.0143553	-0.794058	-1.28923	0.0657378	NA	-0.287348	-1.42761
AA418564	NA	NA	-1.10697	-1.52282	NA	NA	-0.895158	-2.04233	NA	NA	-0.801968	-1.23447	-0.0933715	NA	-0.350497	-1.86658
AA459100	NA	NA	-0.574546	-0.40044	NA	NA	-0.0175086	-0.722361	NA	NA	-0.254365	NA	NA	NA	NA	NA
AA459100	NA	NA	-0.432111	-0.623067	NA	NA	-0.0932188	-0.668947	NA	NA	NA	NA	NA	NA	NA	NA
AA485944	NA	NA	-0.113037	-0.409124	NA	NA	-0.263466	-0.5999	NA	NA	0.183196	-0.350652	0.410155	-0.0381963	0.39486	-0.153665
AA485944	NA	NA	-0.182819	-0.408929	NA	NA	-0.255016	-0.585762	NA	NA	0.191873	-0.443058	0.337303	0.0356239	0.520531	-0.0296395
AA459266	NA	NA	-0.181877	-0.362649	NA	NA	-0.209686	-0.781476	NA	NA	-0.293764	-0.337094	0.304472	-0.361952	-0.0776597	-0.72379
AA459266	NA	NA	-0.139613	-0.408049	NA	NA	-0.249066	-0.755907	NA	NA	-0.224476	-0.395185	0.277216	-0.641546	-0.123927	-0.770594
AA262504	NA	NA	-0.167499	-0.436281	NA	NA	-0.312547	-0.64727	NA	NA	NA	-0.274175	NA	NA	-0.259021	-0.0658021
AA262504	NA	NA	-0.172686	-0.382654	NA	NA	-0.337709	-0.563379	NA	NA	-0.189034	-0.22892	NA	NA	NA	-0.176323
T61948	NA	NA	-0.314213	-0.163499	NA	NA	-0.0931094	-0.133125	NA	NA	NA	NA	NA	NA	NA	NA
T61948	NA	NA	-0.447138	NA	NA	NA	-0.254997	-0.176323	NA	NA	NA	NA	NA	NA	NA	NA
AA055946	NA	NA	NA	NA	NA	NA	NA	NA	NA	NA	NA	NA	NA	NA	NA	NA
AA055946	NA	NA	NA	NA	NA	NA	NA	NA	NA	-0.449867	NA	NA	NA	NA	NA	NA
R47893	-0.451017	-1.06395	-0.798629	-0.921796	-0.314213	NA	-0.682408	-1.39677	NA	NA	-0.347209	-0.666458	NA	NA	-0.778687	-1.22882
R47893	-0.424461	NA	-0.765656	-1.03395	-0.450213	-0.119909	-0.813587	-1.32459	-0.154886	NA	-0.223397	-0.534181	NA	NA	-0.725378	-1.21423
H02848	NA	NA	NA	NA	NA	NA	NA	NA	NA	NA	-0.119909	-0.0143553	NA	NA	NA	NA
H02848	NA	NA	NA	NA	NA	NA	NA	NA	NA	-0.104634	-0.234706	-0.154886	NA	NA	NA	NA
AA664284	-0.337633	-0.51484	-0.647353	-0.505819	-0.0437214	-0.246915	-0.387246	-0.707607	-0.184988	0.403992	-0.65874	-0.321014	0.271889	0.0875248	-0.0481015	0.0720431
AA664284	-0.291889	-0.524347	-0.408126	-0.459432	-0.0541074	-0.805206	-0.366187	-0.936551	-0.381788	0.279636	-0.741238	-0.415037	0.240816	0.116553	0.0169482	0.0851166
AA454218	-0.177085	NA	0.00478506	0.0135641	0.176157	-0.302563	0.0475419	-0.137291	-0.15056	NA	0.0374548	-0.0486738	-0.0700199	NA	0.230216	-0.152063
AA454218	-0.155518	-0.562877	0.0251801	-0.0383983	0.121386	-0.0780025	0.143182	-0.245952	NA	0.241264	0.094144	-0.0394372	-0.0590444	NA	0.155394	-0.142
W04674	0.00619183	-0.44855	0.342547	0.293731	0.485009	0.191713	0.162725	0.00548302	-0.0143553	0.550722	0.0455776	-0.161051	-0.518101	-0.662845	-0.386713	-0.738228
W04674	-0.015854	-0.265524	0.314601	0.25444	0.41877	0.107221	0.203663	-0.0236185	NA	NA	-0.0234372	-0.167438	-0.559379	-0.676765	-0.363325	-0.695086
AA447588	0.520241	0.259465	-0.241629	-0.37515	0.465907	-0.229193	-0.313696	-1.1208	-0.0518867	0.152987	-0.203182	-0.666746	0.466509	0.572081	NA	NA
AA447588	0.515437	0.204505	-0.274272	-0.369686	0.502688	-0.275849	-0.366061	-1.12436	-0.454323	0.232865	-0.150001	-0.69711	0.480762	0.707274	NA	NA
W73406	-0.227552	-0.393233	-0.611951	-0.49322	NA	NA	-0.311165	-0.900712	NA	-0.0857299	-0.360799	-0.413363	NA	NA	NA	-0.482601
W73406	-0.0518672	-0.141869	-0.597674	-0.558409	NA	NA	-0.389597	-0.735197	NA	0.24716	-0.337647	-0.339765	NA	NA	NA	-0.222392
AA001749	0.0174715	-0.487893	-0.353552	-0.365607	0.0365053	-0.28195	-0.355098	-0.69544	-0.336169	-0.650765	-0.239188	-0.304721	-0.293392	-0.241045	-0.220038	-0.431626
AA001749	0.00611	-0.583398	-0.341482	-0.371366	-0.0151255	-0.321119	-0.357299	-0.644188	-0.272526	NA	-0.255896	-0.279517	-0.29619	-0.245802	-0.205125	-0.445344
AA447986	-0.448184	-1.21637	-0.0996162	-0.0292275	-0.103568	-0.18175	0.022392	-0.20482	-0.0749621	0.344143	0.0993369	-0.141416	0.618007	-0.415718	0.788414	-0.185676
AA447986	-0.420513	-0.900464	-0.0520011	-0.0361234	0.229338	-0.349839	0.0427172	-0.194726	-0.127067	NA	0.0810302	-0.0925121	0.610839	-0.522092	0.770026	-0.199657
AA046067	0.131086	-0.365346	-0.801703	-0.738036	0.0766357	-0.478931	-0.507888	-1.01326	-0.210035	0.509166	-0.523958	-0.516291	1.32274	1.16993	0.737328	0.809749
AA046067	0.0203275	-0.353337	-0.822534	-0.76364	0.042868	-0.522678	-0.486289	-0.9569	-0.27989	0.534748	-0.581435	-0.532719	1.29434	1.17417	0.810428	0.825693
AA115537	-0.256934	NA	-1.18053	-1.2038	NA	NA	-0.937123	-1.42668	NA	NA	-0.835563	-0.847997	0.757362	0.974329	0.37808	0.463567
AA115537	-0.0972972	NA	-1.12826	-1.37255	NA	NA	-0.970827	-1.50681	NA	NA	-0.683797	-1.02658	0.752072	0.949053	0.296183	0.499907
N21170	-0.158414	-0.653401	0.315502	0.120067	0.133014	-0.441214	0.0557225	0.237451	-0.141843	0.638901	0.380383	0.473632	NA	NA	0.425607	0.742878
N21170	-0.146726	-0.514573	0.326315	0.286541	0.0917276	-0.259178	0.10192	0.323614	-0.00904514	0.0858362	0.307523	0.329593	NA	NA	0.0612002	0.740213
N20338	-0.225944	-0.68429	-0.0762356	0.0253358	0.0618053	-0.279224	0.0759489	-0.192645	-0.274955	0.47639	0.150377	-0.163499	NA	NA	NA	NA
N20338	-0.265353	-0.694357	-0.20777	-0.060121	-0.0143268	-0.297933	0.0472504	-0.176157	-0.171855	-0.337328	0.0175228	-0.158792	NA	NA	NA	NA
AA625859	-0.307412	-0.564953	-0.394427	-0.345267	0.072018	-0.389513	-0.394463	-0.509274	-0.108667	0.266547	-0.235888	-0.210444	NA	NA	-0.218265	-0.738112
AA625859	-0.210015	-0.704416	-0.302882	-0.315342	-0.0580321	-0.484122	-0.411314	-0.425817	-0.192833	NA	-0.284595	-0.301656	NA	NA	-0.411426	-0.670571
AA609655	-0.426488	-0.597974	-0.638526	-0.517915	-0.0249607	-0.0224374	-0.458336	-0.892022	-0.201019	0.466836	-0.226124	-0.367314	-0.0521755	NA	0.224026	-0.0385346
AA609655	-0.38966	-0.682876	-0.522625	-0.542884	0.0465426	-0.0931094	-0.294292	-0.822576	-0.235869	0.452955	-0.371759	-0.389155	-0.0281872	NA	0.116943	-0.0428229
R01991	-0.447035	-0.917779	-0.0342049	-0.125047	-0.0387124	-0.0440246	-0.135099	-0.289656	-0.383455	-0.154872	-0.0987015	-0.10886	-0.0636311	NA	0.0207586	-0.436279
R01991	-0.363193	-1.0838	-0.178168	-0.147119	0.0312961	-0.167786	-0.0727724	-0.156599	-0.228571	0.554215	-0.133536	-0.214851	-0.262329	NA	0.0853915	-0.484502
W73474	NA	NA	-0.54565	-0.535654	0.0773057	NA	-0.307125	-0.598924	NA	0.845342	-0.420279	-0.457523	0.485427	NA	0.766713	-0.452341
W73474	NA	NA	-0.617496	-0.552924	0.420576	NA	-0.29327	-0.631138	NA	0.614769	-0.392892	-0.510143	0.595525	NA	0.820591	-0.446516
R42685	-0.103623	-0.475085	0.532329	0.395785	NA	NA	0.446751	0.306128	NA	0.301355	0.412724	0.175812	-0.363638	0.15056	-0.669296	0.47899
R42685	0.36105	-0.290818	0.552843	0.334575	0.367371	NA	0.523219	0.346763	NA	0.10561	0.238611	0.179382	-0.440066	0.318076	-0.699446	0.541343
H72030	-0.0903108	NA	-0.820294	-0.94008	NA	NA	-0.705131	-1.23266	NA	NA	-0.635707	-0.684639	NA	NA	NA	NA
H72030	-0.143364	NA	-0.84523	-0.900728	NA	NA	-0.748732	-1.38405	NA	NA	-0.579373	-0.578268	NA	NA	NA	NA
N90783	NA	NA	-0.836367	-1.3001	NA	NA	-0.484088	-1.82148	NA	NA	-0.115477	-0.468149	0.936088	NA	1.22445	-0.0710831
N90783	-0.0840643	NA	-0.684977	-1.38964	NA	NA	-0.407038	-1.66071	NA	NA	-0.159199	-0.404177	0.965938	NA	1.4974	NA
AA446462	-0.158967	NA	-0.81214	-1.01433	-0.154886	NA	-0.718686	-1.27824	NA	NA	-0.756687	-0.708504	-1.32	-1.38221	-1.25298	-1.78101
AA446462	-0.410465	NA	-0.977914	-0.908208	NA	NA	-0.712051	-1.27411	NA	NA	-0.938024	-0.723171	-1.62916	-1.32	-1.39689	-2.4489
AA406064	-0.295456	-0.650717	-0.290827	-0.248638	-0.0109711	-0.516891	0.0216951	-0.285806	NA	0.218265	-0.278976	-0.344412	0.835694	0.465574	0.451509	0.568885
AA406064	-0.143346	-0.744017	-0.229056	-0.210035	0.0277006	-0.131663	0.013648	-0.30649	NA	0.224829	-0.207595	-0.46117	0.822597	0.530144	0.631	0.584405
AA086475	0.188045	-0.111031	0.129233	-0.0243889	0.206766	NA	0.124524	-0.266856	NA	0.16477	0.233199	0.105503	1.37975	1.33543	1.20445	1.61904
AA086475	0.0991846	-0.119909	-0.00536518	-0.0288112	0.259021	NA	0.192097	-0.224025	NA	-0.529405	0.159123	0.110313	1.26121	1.14263	1.17632	1.58151
AA490044	0.169925	-0.439835	-0.174645	-0.56358	0.375509	-0.20581	-0.186195	-1.16118	-0.308631	-0.379041	-0.527652	-0.751806	0.0790716	NA	0.245683	0.401595
AA490044	0.163119	-0.394319	-0.0576929	-0.475966	0.492128	-0.515038	-0.100492	-1.01392	-0.354862	0.0994213	-0.544177	-0.75409	0.11382	0.314213	-0.210499	0.415365
AA620421	-0.137504	NA	NA	NA	NA	NA	NA	NA	NA	NA	NA	NA	NA	NA	NA	NA
AA620421	-0.0612002	NA	NA	NA	NA	NA	NA	NA	NA	NA	NA	NA	NA	NA	NA	NA
AA488247	-0.130717	-0.540123	-0.653662	-0.411278	0.124007	-0.477668	-0.23781	-0.484122	-0.0347131	0.54859	-0.387088	-0.130872	0.198246	NA	-0.411426	0.602272
AA488247	-0.185294	-0.440986	-0.379992	-0.368974	-0.179401	-0.214617	-0.286366	-0.582027	-0.095307	0.578615	-0.370893	-0.339807	0.180374	NA	-0.341037	0.690045
AA497031	-0.465017	-0.450661	-0.110811	-0.191659	0.100448	-0.338105	-0.136502	-0.454012	-0.256672	0.633412	-0.275529	-0.33613	0.33188	0.457682	0.441256	1.33512
AA497031	-0.547033	-0.806675	-0.119665	-0.208642	-0.0627358	-0.39689	0.00637265	-0.403766	-0.0889146	-0.0738427	-0.353637	-0.309002	0.35353	0.647698	0.460897	1.35525
AA078976	-0.191434	-0.475128	-1.05991	-1.10822	-0.153668	-0.399407	-1.0152	-1.19983	-0.445195	0.192048	-0.534576	-0.597417	0.0603946	0.32111	-0.316231	-0.0797645
AA078976	-0.189097	-0.466605	-1.06054	-0.961328	-0.110954	-0.487252	-0.965268	-1.24144	-0.440786	0.572505	-0.477919	-0.485427	0.163151	0.278564	-0.646739	-0.0716491
AA186413	0.0316182	-0.175148	-0.0752133	0.0614732	0.125531	0.130502	-0.0157971	-0.212365	NA	0.649217	-0.109122	-0.00893866	-0.380031	0.0948398	-0.339727	0.104636
AA186413	-0.0767682	-0.381731	-0.104466	0.0509285	0.13945	NA	0.00956064	-0.195282	0.0314325	0.674118	-0.270235	-0.0456776	-0.441804	0.0453653	-0.612677	0.0195002
33	NA	NA	NA	-0.321928	NA	NA	-0.35393	-0.401057	NA	NA	NA	NA	NA	NA	NA	NA
33	NA	NA	NA	-0.201634	NA	NA	-0.208587	-0.76196	NA	NA	NA	NA	NA	NA	NA	NA
AA486402	-0.0365114	-0.516589	-0.332633	-0.433149	0.142118	-0.196477	-0.389128	-0.756709	-0.0696937	-0.762249	-0.167019	-0.283579	0.0443388	-0.513378	0.192068	-0.586153
AA486402	-0.13284	-0.504305	-0.298936	-0.420503	0.0419992	-0.1825	-0.377562	-0.719124	-0.232581	0.353366	-0.368876	-0.348018	0.0435414	-0.425332	0.282987	-0.693936
AA292226	-0.464302	-0.78893	-0.535331	-0.37031	-0.0351521	-0.271074	-0.0989538	-0.494813	-0.0829405	0.551768	-0.0654716	-0.0651893	-0.0718991	-0.621562	0.0184865	-1.15043
AA292226	-0.435178	-0.861052	-0.544521	-0.379717	NA	-0.3325	-0.121144	-0.517068	-0.196627	0.584853	-0.223389	-0.00550609	-0.0457489	-0.653402	0.0229004	-1.02702
AA668703	-0.850964	-1.25757	0.0752791	0.160298	-0.43107	-0.585795	0.194606	0.0539162	-0.441838	0.551466	0.175885	0.193779	0.442791	0.799493	0.554183	1.05213
AA668703	-0.866064	-1.26034	0.117678	0.158988	-0.445481	-0.636973	0.229153	0.0645384	-0.463707	0.492513	0.13367	0.208684	0.414917	0.788087	0.655484	1.03703
AA430665	-0.471032	-0.875821	-0.950437	-0.83419	-0.418953	-0.407806	-0.66676	-0.748405	-0.4026	0.557394	-0.785432	-0.128825	0.0987868	0.177342	0.0727501	0.293663
AA430665	-0.663623	-1.02144	-0.875775	-0.925675	-0.369546	-0.486334	-0.687207	-0.741238	-0.555816	0.22146	-0.734874	-0.197101	0.0549756	0.219805	0.0470035	0.300644
AA699732	-0.0480371	-0.532146	NA	NA	0.0753451	-0.19887	NA	NA	-0.104589	0.624198	NA	NA	NA	NA	NA	NA
AA699732	-0.244061	-0.560062	NA	NA	0.0576548	NA	NA	NA	-0.0740006	0.297297	NA	NA	NA	NA	NA	NA
T81399	-0.61503	-0.909574	-1.01055	-1.38957	-0.184654	-0.694987	-0.715023	-1.37968	-0.117556	0.449073	-0.438442	-0.929439	NA	NA	-2.31711	-1.92288
T81399	-0.623593	-0.961965	-1.03964	-1.1635	-0.15551	-0.733826	-0.703475	-1.38962	-0.0951264	0.545909	-0.736557	-0.939093	-0.0473057	NA	-2.37944	-2.13768
H60460	-0.0563327	-0.396679	-0.101143	-0.294621	0.28834	-0.372263	-0.0419307	-0.986988	-0.118389	0.450409	0.00341871	-0.356991	-0.116119	NA	-0.814096	-1.76575
H60460	-0.0902166	-0.336202	-0.0696193	-0.320871	0.302973	-0.301684	-0.112303	-0.681084	-0.202072	0.42929	0.0495927	-0.361972	-0.166972	NA	-0.659509	-1.81337
T95514	-0.166807	-0.332297	-0.271027	NA	NA	NA	NA	NA	NA	0.333424	0.00406966	-0.15056	NA	NA	NA	NA
T95514	-0.054524	-0.318176	-0.115477	NA	NA	NA	NA	NA	NA	0.148949	-0.0782376	-0.124328	NA	NA	NA	NA
AA083577	-0.309983	-0.633472	-0.3652	-0.259626	-0.0503621	-0.212146	-0.456278	-0.353189	-0.158941	0.636968	-0.197743	-0.00831527	0.019222	-0.00763044	-0.23977	-0.109081
AA083577	-0.185913	-0.580058	-0.368154	-0.257298	-0.23	-0.263799	-0.447305	-0.423197	-0.236786	0.662295	-0.199341	-0.107737	0.0535101	-0.0198387	-0.19197	0.00810208
T73294	-0.135842	NA	0.0887289	0.0249379	0.0565835	NA	-0.0101996	-0.040143	NA	NA	0.0474539	0.0147754	0.58945	0.856521	0.637119	0.92843
T73294	-0.359896	NA	0.113773	0.0142406	NA	NA	0.0222777	-0.0549114	NA	NA	-0.0616923	0.0139972	0.589484	0.862676	0.744689	0.989932
AA431080	0.0772651	NA	-0.271952	-0.11832	NA	NA	-0.0684217	-0.283403	NA	-0.337235	-0.148334	-0.15899	0.454176	0.329602	0.411314	1.05012
AA431080	NA	NA	-0.116222	-0.124755	NA	NA	-0.0556313	-0.313397	NA	NA	-0.10561	-0.167631	0.201634	0.62605	0.729265	1.19873
AA190941	0.417937	0.227177	0	0.250493	0.0885939	NA	0.12755	-0.414385	NA	0.907685	-0.117206	-0.0450097	NA	NA	NA	2.05259
AA190941	0.414406	-0.0332762	-0.0172264	0.261441	NA	NA	0.132104	-0.381755	NA	0.439133	-0.11443	-0.0854758	0	0.337235	NA	2.04356
T39411	-0.101112	-0.197446	-0.514967	-0.58087	NA	NA	-0.499493	-0.882317	NA	0.119909	NA	-0.31034	NA	NA	NA	0.445163
T39411	-0.128142	NA	-0.611435	-0.66728	NA	NA	-0.57932	-0.678072	NA	0.135463	NA	-0.468149	NA	NA	NA	0.428458
AA479928	0.0755804	-0.0285692	-0.525091	-0.652401	NA	NA	-0.564426	-0.817522	NA	0.307324	-0.400538	-0.646174	NA	NA	NA	NA
AA479928	0.0272729	0	-0.627791	-0.617095	NA	NA	-0.487977	-0.836024	NA	NA	-0.468701	-0.636336	NA	NA	NA	NA
AA171449	-0.116563	-0.499102	-0.0383476	-0.191701	NA	NA	-0.024649	-0.519495	NA	-0.133125	-0.0761803	-0.349169	0.247928	0.147226	0.419881	-0.00498628
AA171449	-0.113956	-0.461179	-0.0957168	-0.100357	NA	NA	-0.10317	-0.554538	NA	NA	-0.140643	-0.394943	0.226845	-0.0873451	0.433116	-0.0878009
N28860	-0.397119	-0.671714	-0.201087	-0.128371	0.0266078	-0.442187	-0.143005	-0.376882	-0.105953	0.323428	-0.0881827	-0.0545435	-0.359081	-0.254798	-0.506607	-0.423094
N28860	-0.329766	-0.550814	-0.207645	-0.196662	0.0287489	-0.238787	0.00733664	-0.396231	-0.205114	-0.731459	-0.159315	-0.121464	-0.399824	-0.201695	-0.491771	-0.0417421
AA486067	0.24054	NA	0.483111	0.208995	NA	NA	0.407524	-0.189077	NA	NA	-0.0281969	-0.0615948	1.04777	0.593856	1.25191	0.677507
AA486067	0.208733	NA	0.625207	0.200709	NA	NA	0.354761	-0.229384	NA	-0.286958	-0.027894	0.0490375	1.19332	0.614569	1.21512	0.708739
T97593	-0.0267975	-0.223319	-0.344848	-0.557133	0.378571	0.00233654	-0.571189	-0.853684	-0.0776164	0.427434	-0.199638	-0.526489	-0.0655545	-0.0474905	-0.0639553	-0.308034
T97593	-0.111887	-0.188242	-0.36088	-0.498307	0.349105	0.00894559	-0.488853	-0.877524	-0.0611751	0.458084	-0.151562	-0.546179	0.0214238	-0.219828	-0.119523	-0.343006
AA232979	-0.076491	-0.328262	-0.332977	-0.520652	0.265553	-0.0204641	-0.526069	-0.97188	-0.386507	-0.0994325	-0.118576	-0.536826	NA	NA	-0.0816138	0.701253
AA232979	-0.0528155	-0.261892	-0.347071	-0.498651	0.292394	0.122612	-0.708494	-0.955793	-0.362445	-0.116601	-0.197516	-0.548076	0.0191088	NA	-0.0932322	0.733013
R91264	-0.0626569	-0.380298	-0.0593958	-0.154886	0.492238	0.038889	NA	NA	-0.0853431	0.486095	0.279154	-0.459896	-0.113831	-0.24888	-0.0384229	-0.627634
R91264	-0.0690962	-0.405941	-0.055343	NA	0.437158	-0.20482	0.00875247	-0.0749621	-0.104478	0.561982	0.262521	-0.36013	0.0196288	-0.313629	0.0459615	-0.602327
AA233339	-0.357401	-0.452037	-0.0519121	-0.14882	0.163421	-0.0976108	-0.1582	-0.586244	-0.107107	0.386468	0.0584844	-0.286228	NA	NA	0.15389	0.168819
AA233339	-0.209194	-0.564231	-0.0933434	-0.112452	0.232617	-0.290779	-0.0178815	-0.423842	-0.212585	0.39587	0.0512037	-0.271538	NA	NA	0.166489	0.198884
AA430545	-0.259506	-0.494586	-0.214499	-0.185379	0.238929	0.107691	-0.0729491	-0.445575	0.342328	1.00578	-0.0383992	-0.0186157	-1.34104	-0.920928	-1.71773	-1.615
AA430545	-0.225396	-0.499256	-0.195377	-0.141644	0.331461	0.110784	-0.0767317	-0.37629	0.36568	0.912315	-0.018088	0.00592926	-1.38036	-1.25701	-1.7862	-1.60029
AA020011	-0.252165	-0.381172	-0.521953	-0.363962	-0.0219938	0.037483	-0.318858	-0.665751	0.101362	0.293029	0.158366	-0.257818	-0.141707	-0.547951	-0.377319	-1.53911
AA020011	-0.324456	-0.424409	-0.57593	-0.354299	0.0706208	0.0146117	-0.342775	-0.694801	0.0594662	0.240899	0.137735	-0.26218	-0.184396	-0.445584	-0.454964	-1.5371
N22435	-0.122516	-0.189434	0.267398	0.22464	0.458564	0.466273	0.255877	0.0674319	0.507481	1.17388	0.371023	0.53089	1.10862	1.28092	1.34033	1.35195
N22435	-0.111301	-0.166165	0.151365	0.174149	0.431675	0.47047	0.133785	0.0812195	0.513854	1.0568	0.41396	0.59369	1.00626	1.1629	1.24898	1.2976
H43854	-0.107664	-0.263034	NA	NA	NA	NA	NA	NA	NA	-0.110054	NA	NA	NA	NA	NA	NA
H43854	-0.222392	-0.321018	-0.0749621	-0.400538	NA	NA	-0.115477	-0.532733	NA	0.485427	NA	NA	NA	NA	NA	NA
AA062813	-0.15714	-0.440128	-0.0844389	-0.277706	0.207136	NA	-0.0456921	-0.642461	-0.194304	0.636227	0.109192	-0.217591	NA	NA	NA	NA
AA062813	-0.218081	-0.341494	-0.125531	-0.224892	0.164387	NA	-0.0908212	-0.558517	-0.281232	0.440653	0.0561667	-0.265803	NA	NA	NA	NA
N52293	0.156697	-0.394993	0.138926	-0.131565	0.561676	-0.191015	0.307491	-0.650946	-0.120142	0.61785	0.44881	-0.25296	0.18563	NA	-0.208657	-0.407806
N52293	0.146527	-0.291123	0.0553982	-0.109642	0.626621	-0.219313	0.132718	-0.665296	-0.0435016	0.508549	0.350332	-0.169304	0.34081	NA	-0.132147	-0.522725
AA454791	0.382077	0.501503	0.513816	0.773971	0.920945	1.31015	0.491315	0.584963	1.07041	1.62226	0.839535	1.37117	NA	0.271027	-0.545968	1.04989
AA454791	0.491358	0.537772	0.539941	0.761479	0.919698	1.34985	0.659771	0.702703	1.06982	1.16506	0.847997	1.41399	NA	0.562344	-0.529405	1.17694
T95747	-0.171982	-0.256608	-0.989193	-0.318076	NA	NA	-0.510796	-0.713696	-0.144576	0.537078	NA	NA	NA	NA	NA	-0.00480099
T95747	-0.387816	-0.377885	-0.263034	-0.632268	NA	NA	NA	-0.698959	-0.110703	0.29644	-0.458563	NA	NA	NA	NA	NA
N73278	-0.118022	NA	NA	NA	NA	NA	NA	NA	NA	NA	NA	NA	NA	NA	NA	NA
N73278	-0.159199	NA	NA	-0.259867	NA	NA	NA	NA	NA	NA	NA	NA	NA	NA	NA	NA
AA464691	NA	NA	NA	NA	NA	NA	NA	NA	NA	NA	NA	NA	NA	NA	NA	-0.259021
AA464691	NA	NA	NA	NA	NA	NA	NA	NA	NA	NA	NA	NA	NA	NA	NA	NA
H11042	-0.137068	-0.0612002	NA	-0.41864	NA	NA	NA	NA	NA	0.271027	-0.388515	-0.286881	NA	NA	NA	NA
H11042	-0.20787	-0.111031	-0.0658021	NA	NA	NA	-0.499102	NA	NA	0.221781	-0.343051	-0.271027	NA	NA	NA	NA
AA455284	-0.555619	-0.82268	-0.256742	-0.324951	0.140779	-0.120623	-0.204881	-0.484057	0.134895	0.672618	-0.0611466	-0.00304688	NA	0.0332762	-0.0871692	0.493163
AA455284	-0.49537	-0.873473	-0.282722	-0.339178	0.182658	-0.132863	-0.133387	-0.46434	0.138177	0.609006	0.227715	-0.0901646	0.0285692	0.41864	-0.0474614	0.619851
H93424	NA	NA	NA	NA	NA	NA	NA	NA	NA	NA	NA	NA	NA	NA	NA	NA
H93424	NA	NA	NA	NA	NA	NA	NA	-0.209973	NA	NA	NA	NA	NA	NA	NA	NA
AA126259	0.203363	0.11761	-0.141176	0.0634852	0.783976	0.15691	0.220857	-0.441372	0.534676	1.14375	0.0660388	-0.20482	0.48585	0.710248	0.524683	0.352923
AA126259	0.221298	0.178529	-0.129893	-0.0782756	0.792316	0.124978	0.173812	-0.543712	0.541422	1.03994	0.0467942	-0.191166	0.659925	0.849419	0.34847	0.492073
N93214	-0.130567	-0.431032	-0.714872	-0.818727	0.137595	-0.371741	-0.352028	-0.995183	-0.0242129	0.690194	-0.537293	-0.54451	NA	NA	-0.193246	-0.158384
N93214	-0.191254	-0.345225	-0.859975	-0.850696	0.0867613	-0.298022	-0.473325	-0.900464	0.0328771	0.670409	-0.475234	-0.59405	0.0312187	NA	-0.468149	-0.0638236
AA024832	-0.035066	-0.385926	-0.0667767	-0.17536	0.391472	-0.292539	0.197775	-0.707791	-0.145203	0.556823	0.360824	-0.269048	0.0228228	-0.315042	0.0863362	-0.685151
AA024832	0.0530311	-0.371831	-0.0609108	-0.105876	0.408028	-0.357353	0.145385	-0.674501	-0.0737097	0.555591	0.423242	-0.32666	-0.0196445	-0.292471	0.123199	-0.614916
AA447543	0.0755823	-0.356582	-0.635236	-0.704437	0.347019	-0.550116	-0.288919	-1.27342	-0.0670604	0.635817	-0.108934	-0.675113	NA	NA	NA	-0.119909
AA447543	0.0485746	-0.307778	-0.584292	-0.606143	0.309095	-0.562478	-0.254138	-1.18453	-0.128272	0.578979	-0.109973	-0.580983	NA	NA	NA	NA
N20593	0.0570095	-0.260652	-0.385891	-0.0885939	NA	NA	-0.278976	-0.675765	NA	NA	-0.278976	-0.0976108	NA	NA	NA	NA
N20593	-0.052563	-0.230613	-0.555816	-0.445284	NA	NA	-0.306591	-0.62605	NA	NA	-0.297762	NA	NA	NA	NA	NA
AA027230	-0.190724	-0.298194	-0.204372	-0.18309	0.396583	-0.0181062	-0.0787895	-0.454252	0.162604	NA	0.131742	-0.176528	0.213464	0.240187	0.259027	0.187624
AA027230	-0.165335	-0.286853	-0.192178	-0.142224	0.369797	-0.00362638	-0.0239172	-0.401363	0.197894	0.798335	0.0443596	-0.166897	0.1856	0.263632	0.192269	0.201229
AA026413	-0.0954345	-0.199785	-0.206535	-0.125531	0.475773	NA	-0.13577	-0.668306	0.309809	0.817921	-0.260152	-0.126054	NA	NA	-0.317311	0.727825
AA026413	-0.0815622	-0.200644	-0.258997	-0.18818	0.482521	NA	-0.220526	-0.393843	0.273018	0.427573	-0.189825	-0.130619	NA	NA	-0.378512	0.727628
R59936	NA	NA	NA	NA	NA	NA	NA	NA	NA	NA	NA	NA	NA	NA	NA	NA
R59936	NA	NA	NA	NA	NA	NA	NA	NA	NA	NA	NA	NA	NA	NA	NA	NA
AA398289	-0.0664743	NA	NA	-0.154886	NA	NA	-0.450661	-0.693022	-0.106572	0.0612002	NA	NA	NA	NA	NA	-0.594549
AA398289	0.128486	-0.586024	NA	-0.524745	0.0284986	-0.0160301	-0.463117	-0.341037	NA	NA	NA	NA	NA	NA	NA	-0.306457
R61821	0.1714	0.0263472	-0.482273	-0.600252	0.526812	-0.328582	-0.45934	-1.16269	0.137026	0.737123	-0.281695	-0.42913	NA	NA	-1.13093	-1.10844
R61821	0.18952	0.0555163	-0.506825	-0.658685	0.504342	-0.218702	-0.538816	-1.05699	0.184918	0.804676	-0.378258	-0.417125	-0.461179	NA	-1.11991	-1.14064
AA102556	-0.0851345	-0.298297	-0.259759	NA	0.0924462	-0.0519521	-0.0473057	-0.201634	-0.0270232	0.221504	-0.212236	-0.292782	-0.15277	NA	-0.216811	-0.454964
AA102556	-0.0318087	-0.294034	-0.293928	NA	0.282099	NA	-0.37516	-0.267036	-0.114035	0.0919958	-0.393187	-0.371969	-0.211504	NA	-0.235191	-0.296457
AA609783	-0.167566	NA	NA	NA	NA	NA	NA	NA	NA	0.224354	-0.193246	NA	NA	NA	NA	NA
AA609783	-0.161789	NA	NA	NA	NA	NA	-0.0285692	NA	NA	0.250962	NA	NA	NA	NA	NA	NA
H93373	-0.515765	-0.671693	-0.575502	-0.493636	-0.0144415	-0.0668748	-0.392643	-0.686842	-0.280161	0.232829	-0.30977	-0.30588	0.238787	0.263034	0.297229	0.726401
H93373	-0.454662	-0.847308	-0.625121	-0.566171	0.0731226	-0.182928	-0.341037	-0.714963	-0.282808	0.362291	-0.378301	-0.358227	0.238787	0.318076	0.418853	0.825221
AA426092	-0.219273	-0.701216	-0.719549	-0.234706	-0.00381161	NA	NA	NA	-0.0650339	0.598446	-0.294743	-0.405738	NA	NA	NA	NA
AA426092	-0.325113	-0.727596	-0.799087	NA	-0.121186	NA	-0.350855	NA	NA	0.142847	-0.259021	-0.46591	NA	NA	NA	NA
W93653	1.5002	1.98837	1.61699	1.57854	2.23947	1.24286	1.19207	1.33258	1.70519	1.62568	0.791504	1.5178	NA	NA	NA	1.28036
W93653	1.71122	1.98372	1.57918	1.33914	2.1822	1.63382	1.62137	0.987289	1.75278	1.56445	0.733381	1.62829	NA	NA	NA	1.25298
AA156946	NA	NA	NA	-0.436306	NA	NA	0.279768	-0.31034	NA	NA	NA	NA	NA	NA	NA	0.62293
AA156946	NA	NA	NA	-0.435502	NA	NA	0.0473057	-0.226509	NA	NA	NA	NA	NA	NA	NA	0.782409
AA464166	0.271191	-0.448763	-0.120317	-0.518638	0.952823	-0.585456	0.400101	-1.00279	0.54664	0.744793	-0.154818	-0.561979	1.96976	3.08596	1.52987	2.79556
AA464166	0.268553	-0.418323	-0.0480635	-0.415343	0.937771	-0.575077	0.393224	-1.01505	0.543917	0.86649	-0.0779109	-0.624912	2.06413	3.103	1.39563	2.77196
H29044	-0.295813	-0.136936	-0.755735	-0.535436	0.212004	-0.341931	-0.233174	-0.736025	0.212109	0.697073	-0.1998	-0.187733	NA	NA	NA	-0.314275
H29044	-0.224388	-0.232238	-0.730864	-0.479189	0.0790626	3.30018	-0.191255	-0.78533	0.221487	0.832975	-0.0233325	-0.100005	NA	NA	NA	-0.346128
AA025858	NA	NA	NA	NA	NA	NA	NA	NA	NA	NA	NA	NA	NA	NA	NA	NA
AA025858	NA	NA	NA	NA	NA	NA	NA	NA	NA	NA	NA	NA	NA	NA	NA	NA
R81177	-0.0347654	0.0379942	-0.15056	-0.133125	NA	NA	-0.129541	-0.184809	0.167786	NA	-0.3842	-0.228477	NA	NA	NA	NA
R81177	0.0651563	0.0477826	NA	-0.184809	NA	NA	-0.169237	-0.302563	NA	NA	-0.351844	-0.231816	NA	NA	NA	NA
AA775157	-0.285198	-0.29255	-0.878748	-0.868015	-0.128576	-0.42851	-0.724805	-1.07039	-0.239158	0.531523	-0.446195	-0.42301	0.525568	-0.184827	-0.145511	-0.721101
AA775157	-0.337186	-0.268368	-0.868549	-0.881737	-0.0136007	-0.478351	-0.765399	-1.02574	-0.220097	0.549978	-0.370136	-0.388309	0.621437	-0.202896	-0.249063	-0.718779
H23096	-0.0926357	-0.0117293	-0.625978	-0.341037	0.473454	-0.00937833	-0.309483	-0.865005	0.15372	0.619576	-0.210048	-0.0157329	0.0885939	NA	0.691329	1.33069
H23096	-0.0617762	-0.410114	-0.627716	-0.652077	0.413381	-0.0994174	-0.364812	-0.588165	0.347211	0.822481	-0.180799	-0.0194127	NA	0.378512	0.703469	1.38829
H16803	-0.268243	-0.378472	-0.35795	-0.484578	-0.0203973	-0.233398	-0.649846	-0.945773	0.105464	0.00826931	0.177284	-0.413042	0.183375	-0.101334	-0.454176	0.0573712
H16803	-0.324303	-0.165316	-0.345488	-0.50071	0.0296165	-0.176593	-0.925581	-0.959154	0.115007	0.101853	0.338859	-0.402977	0.0842689	0.140725	0.0764094	0.044577
AA478953	0.118379	-0.122587	0.133239	0.243669	0.491612	0.0358452	0.0790716	-0.493509	-0.0602923	0.227012	0.0310938	-0.332177	NA	NA	-0.454946	0.471845
AA478953	0.0592821	-0.273278	0.0855343	0.146486	0.451602	0.07622	-0.0160599	-0.409307	-0.0662419	0.388897	0.0414199	-0.296916	NA	NA	-0.310788	0.439337
AA479952	-0.297001	-0.580925	0.0847991	0.00750916	0.344474	-0.0680332	0.06866	-0.189971	0.0823224	0.702013	0.169736	-0.0059006	-0.0935741	NA	-0.27807	0
AA479952	-0.276077	-0.531344	0.0138546	-0.0376889	0.322714	0.0107264	0.0670639	-0.333618	0.10751	0.615576	0.293344	-0.00103234	-0.0951572	-0.0379679	-0.109624	0.0198568
AA410893	-0.36257	-0.629162	-0.804604	-0.0749621	NA	NA	-0.0473057	NA	NA	-0.410284	NA	NA	NA	NA	NA	-0.0976108
AA410893	-0.32484	-0.579226	-0.568843	NA	0.0706047	NA	-0.367371	-0.0473057	NA	0.26069	NA	NA	NA	NA	NA	-0.0976108
N51625	-0.0925021	-0.0543398	NA	-0.0749621	NA	NA	NA	NA	NA	0.400538	-0.201634	-0.0143553	NA	NA	NA	NA
N51625	-0.136623	-0.0851166	NA	NA	NA	NA	NA	NA	NA	0.316797	-0.184809	-0.0749621	NA	NA	NA	NA
AA447688	-0.0171024	-0.481635	-0.675063	-0.356144	NA	-0.298658	-0.594933	-0.85333	NA	0.622986	NA	NA	NA	NA	NA	-0.0840643
AA447688	-0.277585	-0.415037	-0.499102	-0.930668	NA	NA	-0.61891	-1.02953	-0.306457	NA	NA	-0.00480099	NA	NA	NA	-0.0238467
R41406	-0.172392	-0.191275	-0.996449	-0.842632	0.0662032	-0.569898	-0.65637	-1.16419	-0.197666	0.535564	-0.436824	-0.59293	-0.240364	-0.294737	-0.525179	-0.856489
R41406	-0.0344475	-0.351194	-1.07553	-0.739603	0.0655992	-0.533317	-0.672209	-1.15154	-0.340545	0.5117	-0.463638	-0.689764	-0.244692	-0.413071	-0.533757	-0.908451
R51818	-0.289433	-0.099565	-0.601344	-0.493183	0.194527	-0.341422	-0.234	-0.788194	0.0905692	0.507077	-0.0568979	-0.453366	0.415037	NA	-0.555479	-0.0277006
R51818	-0.121007	-0.118015	-0.438319	-0.543731	0.21498	0.998046	-0.309883	-0.669459	0.0982586	0.331793	-0.234267	-0.459573	0.292181	NA	-0.610185	-0.117357
R45517	-0.194716	-0.692956	-0.382206	NA	-0.0426443	NA	NA	-0.0795203	-0.489555	0.238328	-0.378512	-0.430027	NA	NA	NA	NA
R45517	-0.24483	-0.740012	-0.422233	-0.0840643	NA	NA	-0.407806	-0.0749621	-0.0519521	0.508421	-0.460226	-0.271546	NA	NA	NA	NA
AA700305	-0.206741	-0.0191088	NA	NA	NA	NA	-0.0143553	-0.197446	NA	NA	NA	NA	NA	NA	NA	NA
AA700305	-0.269333	NA	NA	NA	NA	NA	NA	-0.246915	NA	NA	NA	NA	NA	NA	NA	NA
AA676812	-0.211191	-0.0238467	-0.307299	-0.288742	NA	NA	-0.2322	NA	NA	NA	-0.185414	-0.167786	NA	NA	NA	NA
AA676812	-0.304723	-0.146221	-0.295347	-0.278301	0	NA	-0.179526	NA	NA	-0.627142	-0.149747	-0.234706	NA	NA	NA	NA
W80455	-0.143441	-0.505736	-0.471621	-0.318076	0.0238467	NA	-0.352382	-0.167786	NA	NA	-0.644958	-0.559084	NA	NA	NA	NA
W80455	-0.25225	-0.623501	-0.562344	-0.111031	NA	NA	-0.418535	-0.329602	NA	NA	-0.623602	-0.526069	NA	NA	NA	NA
AA775576	-0.0238467	NA	NA	NA	NA	NA	NA	NA	NA	NA	NA	NA	NA	NA	NA	NA
AA775576	NA	NA	NA	NA	NA	NA	NA	NA	NA	NA	NA	NA	NA	NA	NA	NA
R43522	-0.123714	-0.124116	-0.131484	-0.212124	0.322497	0	-0.1653	-0.408597	-0.0053138	0.235929	0.0409718	-0.0459009	NA	NA	-0.863938	-1.02179
R43522	-0.153223	-0.0709433	-0.0533231	0.0159769	0.310701	0.282934	-0.306661	-0.271027	-0.0292943	-0.163499	NA	-0.0191088	NA	NA	-0.78799	-1.08944
W68256	-0.410449	-0.849508	-0.13608	-0.190048	-0.0653944	-0.00480099	0.0292166	-0.573124	-0.114946	0.350899	0	-0.176026	0.36592	0.425133	0.602943	0.545088
W68256	-0.645374	-0.871697	-0.215918	-0.17727	0.0230836	NA	0.0338412	-0.663339	-0.0668995	0.395692	-0.0569703	-0.197463	0.293172	0.493282	0.680353	0.671582
H91046	-0.543527	-0.658963	-0.0527281	-0.0753066	0.195238	-0.0314325	-0.0852708	-0.285351	0.124645	0.131011	0.244051	-0.13088	0.357552	NA	-0.0587093	0.00389392
H91046	-0.621252	-0.600451	-0.12002	-0.0544945	0.180739	-0.00404683	-0.0539776	-0.250223	NA	0.160465	0.208222	-0.0847362	0.512062	NA	-0.0795203	-0.143125
H24340	NA	NA	NA	NA	NA	NA	NA	NA	NA	NA	NA	NA	NA	NA	NA	NA
H24340	NA	NA	NA	NA	NA	NA	NA	NA	NA	NA	NA	NA	NA	NA	NA	NA
R85941	-0.0957871	-0.298852	-0.0641303	-0.324043	NA	-0.101112	-0.0837389	-0.772689	NA	0.676992	0.178671	-0.333802	NA	NA	-0.0191511	-0.641388
R85941	0.00733132	-0.515788	0.0232698	-0.230814	0.375115	-0.129734	-0.0893475	-0.84008	-0.0847181	NA	0.201793	-0.370511	NA	NA	-0.123829	-0.47853
AA666179	-0.125531	NA	-0.250962	NA	NA	NA	NA	NA	NA	0.271027	NA	NA	NA	NA	NA	NA
AA666179	-0.0723005	NA	NA	NA	NA	NA	NA	NA	NA	0.475085	NA	NA	NA	NA	NA	NA
AA668310	-0.0240273	-0.518209	-0.286881	-0.512534	NA	NA	-0.278747	-0.890621	NA	NA	NA	NA	NA	NA	NA	-0.259021
AA668310	0.00517405	-0.425669	-0.333787	-0.613532	NA	NA	-0.350553	-0.788232	NA	NA	NA	NA	NA	NA	NA	-0.352382
H08424	-0.0459811	-0.11583	-0.453823	-0.473502	0.348352	-0.235339	-0.211673	-0.653757	0.105168	0.575748	-0.0134205	-0.309436	0.00572499	-0.282884	-0.350371	-0.66639
H08424	-0.0692544	-0.0748438	-0.56394	-0.396266	0.309053	-0.251605	-0.154466	-0.716709	0.134317	0.59196	-0.223154	-0.341661	-0.0278521	-0.25634	-0.375156	-0.570354
R37580	NA	NA	NA	NA	NA	NA	NA	NA	NA	NA	NA	NA	NA	NA	NA	NA
R37580	NA	NA	NA	NA	NA	NA	NA	NA	NA	NA	NA	NA	NA	NA	NA	NA
AA055805	-0.222611	-0.461091	-0.180572	NA	NA	NA	NA	NA	NA	NA	-0.40002	-0.234706	NA	NA	NA	NA
AA055805	-0.109461	-0.374808	NA	NA	NA	NA	NA	NA	NA	0.371141	-0.436495	-0.254997	NA	NA	NA	NA
AI653116	-1.21708	-1.51222	-1.94486	-1.2162	-1.02617	-0.953576	-1.7977	-1.46292	-0.115477	-0.475085	-0.608332	-0.475085	NA	NA	NA	-0.359896
AI653116	-1.19249	-1.64761	-2.10094	-0.83996	-1.12531	-1.05195	-1.72737	-1.16564	-0.184809	NA	-0.472345	-0.499102	NA	NA	NA	-0.159199
AI478642	NA	NA	NA	NA	NA	NA	NA	NA	NA	NA	NA	NA	NA	NA	NA	NA
AI478642	NA	NA	NA	NA	NA	NA	0.0986076	-0.163499	NA	NA	NA	NA	NA	NA	NA	NA
H97948	-0.399869	-0.557572	-0.90435	-1.026	-0.278788	-0.425083	-0.755795	-1.19783	-0.124286	0.50508	-0.569095	-0.672717	0.843228	0.271027	0.778861	0.112475
H97948	-0.339324	-0.588263	-1.09035	-0.853578	0.0332085	-0.423732	-0.691256	-1.04619	-0.0661401	0.611159	-0.467378	-0.768409	0.920229	0.425504	0.885295	0.00758649
AI493109	NA	NA	NA	NA	NA	NA	0.0222987	-0.5025	NA	NA	NA	NA	NA	NA	NA	NA
AI493109	NA	NA	NA	NA	NA	NA	-0.323676	NA	NA	NA	NA	NA	NA	NA	NA	NA
AI671826	-0.272783	-0.269005	-0.33795	-0.13245	0.188172	-0.0899421	-0.0553768	-0.378096	0.18206	0.528591	-0.242005	0.00656269	NA	NA	NA	-0.530765
AI671826	-0.183779	-0.329705	-0.316259	-0.185692	0.154688	-0.14439	-0.0942749	-0.354843	NA	0.884523	-0.16549	-0.0824622	NA	NA	NA	-0.446586
AI498392	-0.314155	-0.470394	-1.19911	-0.716625	-0.385654	-0.629162	-0.777608	-1.19745	-0.174625	0.293966	-0.325095	-0.722374	NA	NA	NA	-0.411426
AI498392	-0.238934	-0.522321	-1.23911	-0.757023	-0.244223	-0.565726	-0.794104	-1.23266	-0.18195	0.0462712	-0.29059	-0.734569	NA	NA	NA	-0.32577
AA457374	NA	NA	NA	NA	NA	NA	-0.0253853	-0.0191088	NA	NA	NA	NA	NA	NA	NA	NA
AA457374	NA	NA	NA	NA	NA	NA	NA	NA	NA	NA	NA	NA	NA	NA	NA	NA
N62113	NA	NA	NA	NA	NA	NA	-0.456378	-0.5025	NA	0.600904	NA	NA	NA	NA	NA	NA
N62113	NA	NA	NA	NA	NA	NA	NA	-0.607954	NA	NA	NA	NA	NA	NA	NA	NA
AI651536	-0.453718	-0.76562	-0.416573	-0.530223	NA	-0.529405	-0.333823	-1.05096	-0.486747	-0.0840235	-0.286939	-0.989642	0.970854	NA	1.18546	0.306378
AI651536	-0.413802	-0.864834	-0.422748	-0.625005	0.202218	-0.494332	-0.405623	-1.02488	-0.511629	0.0210616	-0.280809	-0.955541	1	NA	1.17432	0.280108
AI371874	-0.207898	-0.633076	-0.868755	-0.795881	0.076908	-0.578536	-0.326406	-1.0462	-0.0673649	0.530079	-0.42414	-0.333885	0.681074	NA	NA	0.971113
AI371874	-0.202198	-0.663157	-0.857067	-0.772321	0.0413634	-0.500726	-0.370931	-1.09768	-0.229218	0.292961	-0.386112	-0.273682	0.695994	NA	NA	0.887232
3NC	NA	NA	NA	NA	NA	NA	NA	NA	NA	NA	NA	NA	NA	NA	NA	NA
3NC	NA	NA	NA	NA	NA	NA	NA	NA	NA	NA	NA	NA	NA	NA	NA	NA
3NC	NA	NA	NA	NA	NA	NA	NA	NA	NA	NA	NA	NA	NA	NA	NA	NA
3NC	NA	NA	NA	NA	NA	NA	NA	NA	NA	NA	NA	NA	NA	NA	NA	NA
5DR	NA	NA	NA	NA	NA	NA	NA	NA	NA	NA	NA	NA	NA	NA	NA	NA
5DR	NA	NA	NA	NA	NA	NA	NA	NA	NA	NA	NA	NA	NA	NA	NA	NA
5DR	NA	NA	NA	NA	NA	NA	NA	NA	NA	NA	NA	NA	NA	NA	NA	NA
5DR	NA	NA	NA	NA	NA	NA	NA	NA	NA	NA	NA	NA	NA	NA	NA	NA
2Reserved	NA	NA	NA	NA	NA	NA	NA	NA	NA	NA	NA	NA	NA	NA	NA	NA
2Reserved	NA	NA	NA	NA	NA	NA	NA	NA	NA	NA	NA	NA	NA	NA	NA	NA
2Reserved	NA	NA	NA	NA	NA	NA	NA	NA	NA	NA	NA	NA	NA	NA	NA	NA
2Reserved	NA	NA	NA	NA	NA	NA	NA	NA	NA	NA	NA	NA	NA	NA	NA	NA
1DR	NA	NA	NA	NA	NA	NA	NA	NA	NA	NA	NA	NA	NA	NA	NA	NA
1DR	NA	NA	NA	NA	NA	NA	NA	NA	NA	NA	NA	NA	NA	NA	NA	NA
1DR	NA	NA	NA	-0.0426443	NA	NA	NA	NA	NA	-0.389567	NA	NA	NA	NA	NA	NA
1DR	NA	NA	NA	NA	NA	NA	NA	-0.0840643	NA	NA	NA	NA	NA	NA	NA	NA
N49250	0.76684	0.58328	0.158561	NA	0.712143	NA	0.254515	-0.315583	0.0658021	0.99084	NA	-0.0103916	NA	NA	NA	NA
N49250	0.846029	0.644597	0.142675	NA	NA	NA	0.183833	-0.341037	NA	0.908172	NA	-0.11984	NA	NA	NA	NA
AI272002	0.100111	-0.534039	-0.107742	-0.343558	NA	NA	0	-0.622195	NA	0.284595	0.132046	-0.133125	NA	NA	NA	NA
AI272002	0.0799993	-0.469485	-0.178739	-0.318252	NA	NA	0.0758314	-0.526198	NA	0.581753	0	-0.313815	NA	NA	NA	NA
AI668850	-0.312874	-0.471494	-0.0386377	0.16339	0.252581	0.192278	0.318062	-0.00784819	0.214526	1.06979	0.395871	0.806771	0.587635	0.696904	0.906058	0.683792
AI668850	-0.256281	-0.434395	-0.0201247	0.243377	0.365505	0.18974	0.314014	0.0504995	0.22091	1.0054	0.435215	0.680355	0.517176	0.749715	0.912473	0.686312
AI498828	-0.297386	-0.271027	-0.650765	-0.471621	NA	NA	-0.505891	-0.773996	NA	0.17521	-0.340799	-0.47142	NA	NA	NA	NA
AI498828	-0.0290161	-0.389567	-0.692975	-0.452018	NA	NA	-0.55132	-0.776824	NA	0.218265	-0.341037	-0.398549	NA	NA	NA	NA
EMPTY	NA	NA	NA	NA	NA	NA	NA	NA	NA	NA	NA	NA	NA	NA	NA	NA
EMPTY	NA	NA	NA	NA	NA	NA	NA	NA	NA	NA	NA	NA	NA	NA	NA	NA
EMPTY	NA	NA	NA	NA	NA	NA	NA	NA	NA	NA	NA	NA	NA	NA	NA	NA
EMPTY	NA	NA	NA	NA	NA	NA	NA	NA	NA	NA	NA	NA	NA	NA	NA	NA
EMPTY	NA	NA	NA	NA	NA	NA	NA	NA	NA	NA	NA	NA	NA	NA	NA	NA
EMPTY	NA	NA	NA	NA	NA	NA	NA	NA	NA	NA	NA	NA	NA	NA	NA	NA
EMPTY	NA	NA	NA	NA	NA	NA	NA	NA	NA	NA	NA	NA	NA	NA	NA	NA
EMPTY	NA	NA	NA	NA	NA	NA	NA	NA	NA	-0.329602	NA	NA	NA	NA	NA	NA
5NC	-0.225198	-0.385891	-0.498454	NA	-0.0824622	NA	-0.321928	-0.60111	NA	0.234107	NA	-0.341037	NA	NA	NA	NA
5NC	-0.206196	-0.603412	-0.41864	NA	-0.0361823	NA	-0.119909	-0.393233	NA	0.156504	-0.0238467	-0.0565835	NA	NA	NA	NA
5NC	-0.401137	-0.637202	-0.539206	-0.342713	-0.101341	NA	-0.301284	-0.413735	NA	0.321928	-0.225292	-0.273513	NA	NA	NA	-0.773996
5NC	-0.254046	-0.65121	-0.476438	-0.49228	-0.0583642	-0.242857	-0.232723	-0.520088	NA	0.298696	-0.336086	-0.222851	NA	NA	NA	-0.461179
2HG	-0.293726	-0.685215	0.0106416	-0.278408	0.0463021	-0.315874	-0.128299	-0.152979	-0.0895331	0.309813	0.0065023	-0.233892	-0.388743	-1.1608	-0.157635	-0.877828
2HG	-0.529255	-1.13671	0.0374075	-0.117258	0.0482808	-0.302796	-0.170019	-0.133047	-0.135795	0.375575	-0.0400774	-0.261867	-0.343614	-1.12421	-0.109579	-0.909348
2HG	-0.453061	-0.785131	-0.13722	-0.109344	0.00461984	-0.292543	-0.112554	-0.272935	-0.180698	0.311414	0.106232	-0.229635	-0.442233	-1.26545	-0.147596	-1.03282
2HG	-0.64686	-0.770112	-0.11868	-0.110299	0.0553466	-0.276119	-0.158289	-0.361656	-0.156125	0.298572	0.109139	-0.260837	-0.425087	-1.26525	-0.298802	-1.01418
9HG	-0.297957	-0.484738	-0.292616	-0.373458	-0.0272058	-0.180849	-0.391989	-0.344095	-0.246766	0.240659	-0.154936	-0.165329	0.0789548	0.177514	0.125472	0.106566
9HG	-0.284757	-0.521252	-0.284389	-0.399342	-0.0645898	-0.426625	-0.267572	-0.451679	-0.154429	0.409515	-0.358517	-0.246364	0.0990012	0.124413	0.0780443	0.0191088
9HG	-0.413728	-0.728364	-0.44686	-0.364129	0.2645	-0.203027	-0.527493	-0.575816	0.0150618	-0.34126	-0.325854	-0.236552	0.113253	0.134951	0.134078	0.154299
9HG	-0.283086	-0.530022	-0.116166	-0.409255	0.156883	-0.190222	-0.269301	-0.499949	-0.336115	0.342323	-0.264934	-0.392936	0.112475	0.104172	0.269364	-0.0469458
3RC	NA	NA	NA	NA	NA	NA	NA	NA	NA	NA	NA	NA	NA	NA	NA	NA
3RC	NA	NA	NA	NA	NA	NA	0.189998	-0.172061	NA	NA	NA	NA	NA	NA	NA	NA
3RC	NA	NA	NA	NA	NA	NA	0.0612002	-0.0285692	NA	NA	NA	NA	NA	NA	NA	NA
3RC	NA	NA	NA	NA	NA	NA	0.141869	NA	NA	NA	NA	NA	NA	NA	NA	NA
AA083485	NA	NA	NA	NA	NA	NA	NA	-0.847997	NA	NA	NA	NA	NA	NA	NA	-0.0238467
AA083485	NA	NA	NA	NA	NA	NA	NA	NA	NA	NA	NA	NA	NA	NA	NA	NA
W15277	NA	NA	NA	NA	NA	NA	NA	NA	NA	NA	NA	NA	NA	NA	-0.297386	-0.790547
W15277	NA	NA	NA	NA	NA	NA	NA	NA	NA	-0.519374	NA	NA	NA	NA	-0.378512	-0.559084
N53351	NA	NA	NA	NA	NA	NA	NA	NA	NA	NA	NA	NA	NA	NA	NA	NA
N53351	NA	NA	NA	NA	NA	NA	NA	NA	NA	NA	NA	NA	NA	NA	NA	NA
R55993	NA	NA	0.106572	0.281462	NA	NA	0.242361	-0.504529	NA	NA	NA	NA	NA	NA	NA	0.188445
R55993	NA	NA	0.0806686	0.158926	NA	NA	0.232718	-0.40299	NA	NA	NA	NA	NA	NA	-0.0703893	0.301509
H38650	NA	NA	NA	NA	NA	NA	NA	-0.450661	NA	-0.259021	NA	NA	NA	NA	NA	NA
H38650	NA	NA	NA	NA	NA	NA	NA	-0.32577	NA	NA	NA	NA	NA	NA	NA	NA
AA458982	-0.481962	-1.1072	-0.153854	-0.208108	NA	-0.481236	0.428564	-0.437169	-0.0954196	NA	-0.0196734	0.0318901	0.188114	0.962145	0.186368	1.17869
AA458982	-0.561049	-1.10825	-0.098006	-0.164491	NA	-0.3866	0.29203	-0.390813	-0.270035	0.38688	0.00205512	0.0466066	0.123556	0.991116	0.230996	1.14211
AA011215	0.648644	0.295911	0.587125	0.832719	0.622686	0.685672	0.424294	0.145364	NA	0.172061	0.644519	0.571542	1.17147	1.71695	0.820451	1.49155
AA011215	0.586016	0.284923	0.763445	0.717976	0.611254	0.610348	0.391136	-0.00671022	NA	NA	0.319773	0.815185	1.16477	1.71018	0.933634	1.49283
R07296	NA	NA	NA	NA	NA	NA	-0.177787	NA	NA	NA	NA	NA	NA	NA	-0.0795203	NA
R07296	NA	NA	NA	-0.0285692	NA	NA	-0.0765691	-0.385891	NA	-0.818305	NA	NA	NA	NA	-0.302563	NA
H69531	NA	NA	NA	NA	NA	NA	NA	NA	NA	NA	NA	NA	NA	NA	NA	NA
H69531	NA	NA	NA	NA	NA	NA	NA	NA	NA	NA	NA	NA	NA	NA	NA	NA
AA017132	NA	NA	NA	NA	NA	NA	NA	NA	NA	NA	NA	NA	NA	NA	NA	NA
AA017132	NA	NA	NA	NA	NA	NA	NA	NA	NA	NA	NA	NA	NA	NA	-0.209973	NA
AA235388	-0.214819	-0.34861	-0.332132	-0.495662	NA	NA	-0.237831	-1.04924	NA	NA	-0.184809	-0.0931094	0.124328	0.549258	NA	NA
AA235388	-0.330308	-0.505891	-0.439112	-0.357753	NA	NA	-0.176039	-0.941605	NA	NA	-0.310929	-0.0976108	0.20581	0.341037	0	-0.0426443
N69107	0.292376	0.197373	0.423819	0.70617	0.473564	0.411426	0.779915	0.429761	0.628657	0.741364	0.941533	0.920193	-0.583565	-0.654233	-1.28748	-1.20224
N69107	0.258345	0.137095	0.329162	0.68841	NA	0.647698	0.625045	0.62962	0.387293	1.25638	0.831544	0.943271	-0.578216	-0.656169	-1.44181	-1.35111
AA486321	-0.495431	NA	-0.520456	-0.75743	NA	NA	-0.488986	-0.788496	NA	NA	-0.267989	-0.485091	0.0532014	-0.499102	-0.389567	-1.24082
AA486321	-0.453537	-0.263034	-0.51911	-0.70902	NA	NA	-0.52561	-0.845168	NA	NA	-0.440399	-0.444268	0.0368996	-0.672048	-0.481988	-1.25298
AA453300	-0.0659214	-0.0473057	-0.209973	-0.436517	NA	NA	-0.334001	-0.884923	NA	NA	NA	-0.43048	NA	NA	NA	-0.382206
AA453300	-0.240698	-0.41864	-0.389567	-0.542671	NA	NA	-0.232065	-0.931053	NA	NA	NA	-0.159199	NA	NA	NA	-0.133125
AA279941	NA	NA	-0.105353	-0.487489	NA	NA	-0.271167	-0.715687	NA	NA	-0.0240455	-0.34125	NA	NA	-0.65085	-0.482194
AA279941	NA	NA	-0.250466	-0.389676	NA	NA	-0.377539	-0.683696	NA	NA	-0.102707	-0.105203	NA	NA	-0.337235	-0.579549
H85355	NA	NA	-0.258602	-0.376255	NA	NA	0.155651	-0.466305	NA	NA	0.141586	-0.136137	NA	NA	-0.776518	-0.462082
H85355	NA	NA	-0.3113	-0.166249	NA	NA	0.0577155	-0.405147	NA	NA	-0.0698214	-0.043569	NA	NA	-0.690045	-0.503464
R12473	-0.35019	-0.737673	-0.579715	-0.453274	-0.148429	-0.396581	-0.315958	-0.820434	-0.371042	0.696771	-0.284323	-0.285598	0.226509	0.172165	-0.403207	-0.0561431
R12473	-0.331156	-0.775122	-0.472119	-0.43512	-0.169141	-0.538365	-0.40047	-0.776914	-0.296561	-0.656878	-0.342422	-0.236048	0.235985	0.196508	0.123004	-0.123142
R88247	NA	NA	NA	NA	NA	NA	NA	NA	NA	NA	NA	NA	NA	NA	-0.698959	-0.172061
R88247	NA	NA	NA	NA	NA	NA	NA	NA	NA	NA	NA	NA	NA	NA	-0.690316	-0.214125
AA453776	0.169925	-0.102098	-0.287465	-0.50276	NA	0.180572	-0.236798	-0.916314	NA	0.382857	-0.350281	-0.432959	0.122619	0.688364	-0.436517	0.143364
AA453776	0.171436	NA	-0.311125	-0.490558	NA	NA	-0.216074	-0.973768	NA	NA	-0.4267	-0.385004	0.0141442	0.818053	-0.226509	0.218125
T98612	NA	NA	NA	NA	NA	NA	NA	NA	NA	NA	NA	NA	NA	NA	NA	NA
T98612	NA	NA	NA	NA	NA	NA	NA	NA	NA	NA	NA	NA	NA	NA	NA	NA
W68141	0.137193	-0.352019	-0.376162	-0.287843	-0.0982441	-0.219934	-0.244115	-0.804992	-0.145401	NA	-0.441768	-0.341836	-0.0244968	0.0630055	-0.450929	-0.381827
W68141	0.112214	-0.232626	-0.451543	-0.27697	0.0259677	-0.276718	-0.152833	-0.766612	-0.11876	0.433215	-0.504153	-0.331671	-0.0369153	0.0737214	-0.579782	-0.409264
R26186	0.474246	0.23584	0.00936003	-0.0368225	0.490238	0.0259315	0.0781597	-0.543939	0.0309775	0.51562	-0.443883	-0.257736	1.29318	1.99481	0.860149	1.40478
R26186	0.499463	0.198395	-0.0332685	-0.0187462	0.528379	-0.0164736	0.222012	-0.518065	0.206917	0.598939	-0.463254	-0.175146	1.24547	2.04564	0.911463	1.44571
AA434420	NA	NA	NA	NA	NA	NA	NA	NA	NA	NA	NA	NA	NA	NA	-0.0379679	-2.03772
AA434420	NA	NA	NA	NA	NA	NA	NA	NA	NA	NA	NA	NA	NA	NA	NA	NA
R38343	NA	NA	NA	NA	NA	NA	-0.0976108	NA	NA	-0.321928	NA	NA	NA	NA	NA	NA
R38343	NA	NA	NA	NA	NA	NA	NA	-0.00958605	NA	NA	NA	NA	NA	NA	NA	NA
N56693	NA	NA	NA	-0.731183	NA	NA	-0.436864	-1.23061	NA	NA	NA	NA	NA	NA	NA	NA
N56693	NA	NA	0	-0.745033	NA	NA	-0.338651	-1.08179	NA	-1.18941	NA	-0.115477	NA	NA	NA	NA
W44454	-0.10758	-0.0565835	-0.0635651	-0.16865	NA	NA	-0.0234863	-0.524457	NA	-0.257956	-0.0956353	NA	-0.00435202	NA	-0.180794	-0.144093
W44454	-0.195446	-0.184809	-0.102946	-0.174935	NA	NA	-0.113101	-0.584237	NA	NA	0.159199	-0.232331	0.0196824	NA	0.0263113	0.0162285
AA448277	1.27545	0.619804	1.30107	1.15825	NA	NA	1.3373	0.607225	NA	NA	0.189034	0.0473057	1.37851	2.08972	1.15056	2.256
AA448277	1.09148	0.922491	1.32836	1.09686	NA	NA	1.1369	0.76651	NA	NA	0.146221	0.391191	1.53605	2.19849	0.972432	2.09741
W45572	-0.117869	-0.316857	0.700849	0.583862	0.462889	0.80609	0.366447	0.351495	-0.223994	-0.472865	0.788061	-0.16679	0.267015	-0.0374747	0.604208	0.387832
W45572	-0.0219816	-0.412447	0.738743	0.658184	0.493087	0.713255	0.464806	0.474574	-0.261552	-0.318076	0.829291	-0.205611	0.276338	-0.0178849	0.488847	0.382535
AA450360	0.190862	-0.275324	-0.13919	-0.201309	0.102114	-0.0260735	-0.308853	-0.666299	-0.0671142	0.235405	-0.159221	-0.376818	0.0269491	0.246514	-0.0768508	0.143139
AA450360	0.194465	-0.215968	-0.111893	-0.227558	0.129333	0.0329289	-0.416685	-0.629	-0.133533	-0.633057	-0.104132	-0.25617	0.0153289	0.270925	0.0873665	0.144704
AA449430	NA	-0.193246	-0.64689	-0.241847	NA	NA	-0.199616	-0.508072	NA	NA	NA	NA	-0.0238467	-0.186126	-0.278976	-0.124328
AA449430	NA	NA	-0.145583	-0.221207	NA	NA	-0.127703	-0.534513	NA	NA	0	-0.0931094	NA	-0.0612002	NA	NA
AA598572	-0.264166	-1.00959	-0.281326	-0.524183	NA	NA	-0.24914	-1.01388	-0.0238467	NA	-0.286881	-0.524544	-0.0883268	-0.184809	-0.0143553	-0.859882
AA598572	-0.285788	-0.974341	-0.388003	-0.482424	NA	NA	-0.347773	-0.99307	NA	0.376218	-0.252274	-0.454654	-0.102779	-0.176323	NA	-0.711569
AA599127	-0.253931	-0.601063	-0.267818	-0.210617	0.0695319	-0.156197	-0.0116891	-0.344734	0.0243402	0.884825	-0.167739	0.0616417	0.0362361	-0.120535	0.182994	-0.101324
AA599127	-0.259733	-0.610624	-0.243736	-0.0471911	0.0225555	-0.163283	-0.019022	-0.2872	-0.0617635	0.911287	-0.215477	0.00545809	0.0554619	-0.159119	0.262278	-0.12021
AA133129	0.123735	-0.208167	0.188581	0.138328	NA	0.297949	0.00992167	-0.165649	0.017058	0.658464	0.170096	0.39126	0.475995	-0.17253	0.443841	0.0877301
AA133129	0.0416145	-0.235047	0.121166	0.0913781	NA	0.280247	0.0958295	-0.241603	0.258057	0.630798	0.3113	0.378815	0.525675	-0.121783	0.353868	0.110401
AA487593	-0.146401	-0.491369	-0.552556	-0.337133	-0.238026	-0.355531	-0.588612	-0.707745	-0.244446	0.435005	0.0610676	0.336958	-0.490436	-1.2671	-0.336168	-1.50245
AA487593	-0.208597	-0.572883	-0.552583	-0.359751	-0.303998	-0.1874	-0.566775	-0.685052	-0.224488	0.414426	0.108675	0.29525	-0.567585	-1.29894	-0.292959	-1.31108
R39356	-0.119415	-0.588165	0.0779412	0.0293892	0.267622	-0.159199	0.248878	-0.364811	NA	0.00492388	0.196641	-0.253438	-0.228263	-0.106483	-0.00183339	-0.00379269
R39356	-0.225545	-1.0409	0.147982	-0.0448252	0.231326	NA	0.224517	-0.380424	-0.422878	0.108987	0.133892	-0.376781	-0.259912	-0.126437	0.0412788	0.0236339
AA598670	-0.304148	-0.697495	0.223883	0.272232	NA	0.00921853	0.388781	0.0811771	-0.0382025	0.230549	0.26154	0.368847	0.661422	0.806895	0.95589	0.898129
AA598670	-0.333199	-0.703689	0.236905	0.311452	0.00464636	-0.0026018	0.39238	0.0586691	0.0703893	0.369439	-0.132475	0.237421	0.626454	0.838201	0.968464	0.970455
H46254	NA	NA	-0.481919	-0.584963	NA	NA	-0.326885	-0.987437	NA	NA	NA	NA	NA	NA	NA	NA
H46254	-0.233059	NA	-0.517915	-0.793732	NA	NA	-0.235964	-0.955551	NA	NA	NA	NA	NA	NA	NA	NA
AA022561	-0.662965	NA	-1.9317	-1.9617	NA	NA	-1.38771	-1.93269	NA	NA	-0.742933	-0.865504	0.435103	0.0257226	0.414074	-0.2689
AA022561	-0.83996	NA	-2.2223	-1.91013	NA	NA	-1.26098	-1.80797	NA	NA	-0.805781	-0.916106	0.394332	-0.0813883	0.568843	-0.310151
AA416890	-0.116486	-0.65599	-0.128823	-0.109446	0.193772	NA	0.0460596	-0.344678	-0.137504	0.20581	-0.147198	-0.106093	0.598365	0.656912	0.291009	0.769652
AA416890	-0.167832	-0.600569	-0.103347	-0.226554	-0.209973	-0.0801703	-0.0902426	-0.323212	NA	0.132799	-0.201315	-0.128188	0.544617	0.749096	0.167945	0.774825
AA488084	1.51037	1.04771	1.79369	2.00448	1.65605	1.33535	1.08902	0.854069	1.03747	1.42136	0.906395	0.834552	1.228	3.62183	0.655425	3.03797
AA488084	1.50218	0.917825	1.75162	1.85914	1.74234	1.16469	1.27652	0.732225	0.799625	-0.105768	1.01902	0.8547	1.32091	3.57476	0.485873	3.16958
N63770	-0.371297	-0.621742	-0.493815	-0.218865	NA	NA	-0.0580164	-0.534016	0.0659633	0.481004	-0.0574788	-0.0322842	0.0915151	0.451309	-0.384294	-0.0412227
N63770	-0.247993	-0.600341	-0.0771367	-0.226771	-0.111031	NA	-0.00699369	-0.601886	NA	-0.83996	-0.0780025	-0.0444343	0.112475	0.564161	-0.358213	0.07625
AA663983	-0.504481	-0.992903	0.085472	0.0861507	0.0210046	-0.16378	0.225512	-0.0332163	0.0933784	NA	0.172939	0.277226	-0.0859803	0.100513	0.137933	0.181414
AA663983	-0.520313	-1.04048	0.00661314	0.093044	0.158122	-0.0105656	0.258738	0.0283046	0.0444208	0.747974	0.193916	0.298125	-0.11355	0.0941986	0.191519	0.205399
N70734	-0.125372	-0.519876	-0.42788	-0.613419	-0.0767394	-0.490476	-0.297638	-1.01805	-0.15056	-0.594206	-0.223941	-0.448723	0.0901069	0.368513	-0.299034	0.250962
N70734	-0.14543	-0.517984	-0.431376	-0.624379	-0.0379679	-0.429393	-0.313158	-1.00756	0.0441849	0.172364	-0.179324	-0.444832	0.138654	0.347593	-0.25579	0.662727
AA625632	-0.142509	-0.526999	-0.264809	-0.240166	-0.00811873	-0.273796	-0.223569	-0.417753	-0.165265	-0.707819	-0.239899	-0.0828598	-0.202056	-0.269758	-0.258344	-0.205305
AA625632	-0.138698	-0.220442	-0.241038	-0.0701251	-0.0370673	-0.389412	-0.23296	-0.351083	-0.121883	0.400538	-0.254013	-0.0691485	-0.178221	-0.249282	-0.272676	-0.25747
AA457700	0.467188	0.0545117	0.93948	0.869923	0.766438	0.55322	0.483121	0.285844	0.0177643	0.0735067	0.638607	-0.0908107	1.43677	1.5472	1.80471	1.69829
AA457700	0.502052	0.0361807	0.996052	0.863843	0.79199	0.683893	0.511878	0.184969	0.0117377	-0.874469	0.485427	-0.0674603	1.4237	1.55193	1.8137	1.65876
W51760	NA	NA	NA	NA	NA	NA	NA	NA	NA	NA	NA	NA	NA	NA	NA	NA
W51760	NA	NA	NA	NA	NA	NA	NA	NA	NA	NA	NA	NA	NA	NA	NA	NA
AA442994	-0.261648	NA	NA	-0.265273	NA	NA	-0.249359	-0.662965	NA	-0.956383	NA	-0.0238467	NA	NA	NA	-0.0840643
AA442994	-0.416175	NA	NA	-0.157541	NA	NA	0.101972	-0.669027	NA	NA	NA	NA	NA	NA	-0.176323	NA
AA001897	NA	NA	NA	NA	NA	NA	0.0391384	NA	NA	NA	NA	NA	NA	NA	NA	NA
AA001897	NA	NA	NA	NA	NA	NA	-0.153583	-0.00958605	NA	NA	NA	NA	NA	NA	NA	NA
AA437136	-0.176878	-0.536362	-0.414129	-0.539366	NA	NA	-0.572251	-0.831877	NA	NA	-0.0426443	-0.526069	NA	NA	NA	-0.102098
AA437136	-0.172795	NA	-0.656698	-0.736966	NA	NA	-0.480626	-1.11313	NA	NA	-0.0976108	-0.562344	NA	NA	NA	-0.230613
AA683041	0.208744	-0.286481	-0.124328	NA	NA	NA	-0.321928	-0.485427	NA	0.0893595	NA	NA	NA	NA	NA	NA
AA683041	0.0722251	-0.421827	-0.298658	-0.0379679	NA	NA	NA	-0.0703893	NA	0.278976	NA	NA	NA	NA	NA	NA
AA121668	-0.112107	-0.284846	-0.165167	-0.229489	0.272442	0.0813001	0.0114736	-0.372536	0.0543435	0.85233	-0.00044045	0.0402166	0.813035	1.06789	0.966043	1.01135
AA121668	-0.078916	-0.396819	-0.140738	-0.182208	0.38845	0.0120035	0.0424598	-0.45477	0.0617278	-0.180572	-0.10277	0.0368183	0.756222	1.09179	0.924753	1.05999
H51113	NA	NA	NA	NA	NA	NA	NA	-0.677503	NA	NA	NA	NA	NA	NA	NA	NA
H51113	NA	NA	NA	NA	NA	NA	NA	-0.552541	NA	NA	NA	NA	NA	NA	-0.193246	NA
R54176	-0.0872987	-0.868755	-0.0856561	-0.211504	0.186205	NA	0.0426443	-0.532817	NA	0.285784	-0.00513872	-0.338097	-0.0105741	-0.185496	-0.292857	-0.389598
R54176	-0.0408224	-0.781654	-0.10696	-0.223096	NA	NA	-0.0027682	-0.484411	NA	NA	-0.0115957	-0.253897	-0.0440702	-0.103966	-0.285329	-0.359976
T52674	-0.324597	-0.367371	NA	NA	NA	NA	0.0296117	-0.341037	NA	NA	NA	NA	NA	NA	NA	NA
T52674	-0.210859	-0.102098	NA	NA	NA	NA	NA	-0.259021	NA	NA	NA	NA	NA	NA	NA	NA
AA478273	-0.160708	-0.459027	-0.077104	-0.137921	0.0757108	-0.243406	-0.0022661	-0.441364	-0.0932442	0.500941	0.0026618	-0.0441849	0.571733	0.703274	0.664005	0.713669
AA478273	-0.185438	-0.633461	-0.159859	-0.213893	0.175978	-0.354934	0.0133308	-0.320991	0.0953263	0.238641	-0.0903969	-0.0321872	0.580434	0.728872	0.693981	0.691198
AA669314	-0.561841	-0.793791	0.386061	0.397688	0.223325	0.0564451	0.452939	0.336683	0.112538	0.263613	0.473832	0.424095	0.347776	0.711026	0.454966	1.01471
AA669314	-0.342762	-0.588587	0.396478	0.48081	0.186738	-0.0723142	0.493539	0.314236	0.383683	-0.0478097	0.427862	0.435886	0.388395	0.697083	0.517154	1.01861
AA019320	NA	NA	NA	NA	NA	NA	0.0155632	-0.159199	NA	NA	0.748461	NA	NA	NA	NA	NA
AA019320	NA	NA	NA	NA	NA	NA	-0.0599007	-0.0519521	NA	NA	NA	NA	NA	NA	NA	NA
AA055350	NA	NA	NA	NA	NA	NA	-0.12441	NA	NA	NA	NA	NA	NA	NA	-0.00480099	NA
AA055350	NA	NA	NA	NA	NA	NA	-0.218265	NA	NA	NA	NA	NA	NA	NA	NA	NA
W74536	-0.386512	NA	NA	-0.464668	NA	NA	-0.0373605	-0.633769	NA	NA	NA	-0.226509	NA	NA	NA	NA
W74536	-0.233199	NA	NA	-0.532733	NA	NA	-0.0890224	-0.656878	NA	NA	NA	-0.363638	NA	NA	NA	-0.0931094
AA664101	NA	NA	NA	NA	NA	NA	NA	NA	NA	NA	NA	NA	NA	NA	NA	NA
AA664101	NA	NA	NA	NA	NA	NA	NA	NA	NA	NA	NA	NA	NA	NA	-0.213357	NA
AA281784	-0.20148	-0.477457	-0.259504	-0.0937144	0.198166	-0.0775829	-0.0156489	-0.361768	0.00628626	-0.246915	0.0414994	0.0314374	-0.129635	0.0803098	-0.277812	0.231432
AA281784	-0.078512	-0.591037	-0.184996	-0.283724	0.169925	NA	-0.0425154	-0.372947	0.0551416	NA	0.0582706	0.00506387	-0.01805	0.0932815	-0.00624995	0.368174
AA262080	-0.457734	-0.645992	-0.945893	-1.19186	NA	NA	-0.781908	-1.2665	NA	NA	NA	-0.633461	-1.07682	-0.910733	-0.956057	NA
AA262080	-0.313935	-0.855718	-0.946071	-0.968243	NA	NA	-0.790648	-1.37601	NA	NA	NA	-0.70464	-1.13313	-0.9855	-0.831877	-1.46682
AA521339	0.00784075	NA	0.0987782	-0.201634	NA	NA	0.268442	-0.812277	NA	NA	-0.111283	-0.260743	1.99518	1.73985	1.4991	1.97331
AA521339	0.247928	NA	0.177998	-0.0963439	NA	NA	0.37933	-0.581515	NA	0.0379679	-0.0410273	-0.1594	1.5509	1.48371	1.14187	1.83053
AA465536	NA	NA	NA	-0.382206	NA	NA	-0.0366687	NA	NA	NA	0	-0.0703893	NA	NA	-0.0292646	0.00472241
AA465536	NA	NA	NA	-0.178597	NA	NA	-0.0119975	-0.538826	NA	NA	NA	-0.268402	NA	NA	-0.0665512	0.0679656
H15539	NA	NA	NA	NA	NA	NA	0.0991332	NA	NA	-0.172061	NA	NA	NA	NA	-0.250962	NA
H15539	NA	NA	-0.238467	NA	NA	NA	NA	NA	NA	NA	NA	NA	NA	NA	NA	NA
AA628154	-0.13714	-0.429393	-0.970308	-0.944291	NA	NA	-0.640118	-1.48782	NA	0.0473057	-0.608702	-0.735792	0.167378	0.840357	-0.0612002	0.39845
AA628154	-0.485748	-0.529405	-0.777445	-0.996103	NA	NA	-0.690206	-1.44072	NA	NA	-0.504428	-0.735145	0.193009	0.822555	NA	0.514343
AA775355	-0.364525	-0.634238	-0.536672	-0.603748	-0.0598761	-0.547045	-0.625045	-0.953374	-0.187773	0.209662	-0.387698	-0.410909	-0.0330768	0.188486	0.0857979	0.023537
AA775355	-0.403199	-0.605235	-0.571283	-0.614299	-0.115024	-0.445827	-0.476707	-0.951853	-0.0390655	0.400385	-0.404765	-0.306919	-0.0622159	0.238902	0.134376	0.075136
AA775872	NA	NA	NA	NA	NA	NA	NA	NA	NA	NA	0.0131754	-0.0143553	NA	NA	NA	NA
AA775872	NA	NA	NA	NA	NA	NA	-0.174396	NA	NA	-0.119909	NA	-0.202224	NA	NA	NA	NA
R14080	0.0493055	-0.785596	-0.279927	-0.359245	0.145807	-0.254997	-0.0654556	-0.707292	-0.0677201	0.479056	-0.0659315	-0.350399	0.397021	0.105564	0.416208	0.0409341
R14080	0.0305404	-0.665498	-0.379936	-0.31611	0.353421	-0.502927	-0.0253996	-0.711054	NA	0.605348	0.0610885	-0.357619	0.41412	0.0836785	0.341806	0.06608
AA026557	NA	NA	NA	NA	NA	NA	-0.23349	-0.457682	NA	NA	NA	NA	NA	NA	NA	NA
AA026557	NA	NA	NA	NA	NA	NA	-0.163499	NA	NA	NA	NA	NA	NA	NA	NA	NA
W90381	-0.0288173	-0.567652	-0.385045	-0.610053	NA	NA	-0.506185	-1.23266	-0.158262	NA	-0.222392	-0.323614	0.180963	0.459432	-0.0379679	0.0319248
W90381	0.0900282	-0.401592	-0.50959	-0.77664	NA	NA	-0.384785	-1.11513	-0.0321804	-0.0426443	-0.312468	-0.271302	0.176633	0.476592	-0.141869	0.0971292
AA497079	NA	NA	-0.199309	-0.299824	NA	NA	-0.113094	-0.653824	NA	NA	NA	-0.271027	NA	NA	NA	NA
AA497079	-0.135777	NA	NA	-0.431846	NA	NA	-0.144296	-0.759866	NA	NA	NA	-0.00958605	NA	NA	NA	NA
AA418694	-0.51642	-0.974654	0.0256929	0.0815702	0.0937022	-0.187467	0.333473	0.0252035	0.0681543	-0.163499	0.0546353	0.212127	0.222392	0.102871	0.524003	0.284895
AA418694	-0.560407	-0.934351	0.0102123	0.0919649	0.102861	-0.105038	0.34678	0.00179278	0.0475251	0.611904	0.0839858	0.220356	0.202598	0.143458	0.590016	0.280199
AA495974	NA	NA	0.0074558	-0.351147	NA	NA	-0.146572	-0.85644	NA	NA	NA	NA	NA	NA	NA	0.757023
AA495974	NA	NA	-0.0157673	-0.45799	NA	NA	-0.0259019	-0.838431	NA	NA	NA	-0.0840643	NA	NA	NA	0.167786
H85464	-0.178316	-0.586858	-0.33885	-0.370656	-0.0821745	-0.477854	-0.214191	-0.655838	-0.192331	0.597323	-0.387649	-0.260458	0.0737169	0.530997	-0.0345246	0.558864
H85464	-0.187309	-0.574808	-0.446939	-0.36234	-0.0832098	-0.481502	-0.257982	-0.6384	-0.188016	0.560458	-0.453139	-0.28063	0.066886	0.545573	-0.040817	0.620865
AA459308	NA	NA	NA	-0.259021	NA	NA	-0.259021	-0.106572	NA	NA	NA	NA	NA	NA	NA	NA
AA459308	NA	NA	NA	-0.341037	NA	NA	-0.271433	NA	NA	NA	NA	NA	NA	NA	NA	NA
AA505045	-0.225881	-0.528771	-0.399738	-0.617678	-0.0992244	NA	-0.261472	-0.687665	-0.015513	-0.257798	-0.134817	-0.283393	NA	NA	-0.15056	NA
AA505045	-0.229823	-0.443908	-0.326203	-0.61424	-0.0658021	NA	-0.1418	-0.775671	0.0180565	NA	-0.0852023	-0.212286	NA	NA	-0.271027	NA
AA283007	NA	NA	NA	NA	NA	NA	-0.416208	NA	NA	NA	NA	NA	NA	NA	NA	NA
AA283007	NA	NA	NA	NA	NA	NA	-0.127025	NA	NA	NA	NA	NA	NA	NA	NA	NA
AA251784	-0.44313	-1.0503	-0.349432	-0.537048	-0.185791	-0.321928	-0.147334	-0.751172	-0.177827	NA	-0.0985404	-0.257158	0.285372	-0.394403	0.036013	-0.564519
AA251784	-0.528994	-0.918246	-0.365857	-0.499571	-0.27909	-0.0473057	-0.290935	-0.828122	-0.118395	NA	-0.187933	-0.25018	0.358804	-0.410227	0.104842	-0.426497
AA664007	-0.256293	-0.458664	-0.226544	-0.30043	NA	NA	-0.00685367	-0.520007	NA	NA	-0.106579	-0.150104	0.209923	0.358135	-0.209973	0.254764
AA664007	-0.219761	-0.436517	-0.135033	-0.254046	NA	NA	-0.101809	-0.601114	NA	NA	-0.179149	-0.157838	0.243454	0.274976	NA	0.326965
AA520979	0.634351	0.49436	0.838369	0.887727	NA	NA	0.684977	0.189997	NA	0.556393	0.238577	0.248686	1.4657	2.29342	1.52395	2.33946
AA520979	0.853534	0.317835	0.969239	1.10215	0.481988	NA	0.686204	0.119412	NA	0.462035	0.314315	0.145339	1.33849	2.34295	1.28806	2.29895
AA504625	-0.395723	-0.834809	-0.502146	-0.753493	0.0199454	-0.501722	-0.651345	-1.16182	-0.634716	0.0215561	-0.605278	-0.765309	-1.93729	-3.00041	-2.27698	-2.85855
AA504625	-0.376422	-0.642264	-0.538866	-0.745719	-0.19045	NA	-0.47592	-1.09283	-0.278691	-0.0984037	-0.374569	-0.720821	-2.00741	-3.11126	-2.06928	-2.94292
AA488979	-0.376539	-0.756046	0.128707	0.0610962	NA	-0.290393	0.352595	-0.215851	NA	0.163663	-0.140836	-0.117459	0.257703	0.453477	0.564005	0.6604
AA488979	-0.276595	-0.813772	0.0563236	0.0643346	0.0454897	-0.181261	0.0479702	-0.29844	NA	0.229078	-0.14799	-0.0866562	0.24897	0.454313	0.53593	0.628361
AA485052	-0.412707	-0.705467	0.0146468	0.0637524	0.0356239	0.196044	0.274217	-0.246365	0.17817	-0.313158	0.112531	0.0753848	0.115527	0.418082	0.309047	0.606336
AA485052	-0.28456	-0.723105	-0.0213268	0.0793889	0.0984398	-0.218265	0.050092	-0.115848	0.0297912	NA	0.0935364	0.0489336	0.172439	0.437877	0.321685	0.72069
N49751	0.209205	NA	0.457117	0.278156	NA	NA	0.125116	0.119639	NA	0.986411	0.167786	0.177032	0.299189	0.874469	0.593743	1.28838
N49751	0.353817	NA	0.565499	0.214478	NA	NA	0.14732	0.143973	NA	NA	0.369088	-0.0912165	0.33887	0.81284	0.476559	1.08406
R39221	NA	NA	-0.371094	-1.16903	NA	NA	-0.674877	-1.18676	NA	NA	NA	-0.611246	NA	NA	NA	-0.189034
R39221	NA	NA	-0.374808	-1.2555	NA	NA	-0.648835	-1.18903	NA	NA	-0.0885939	-0.709774	NA	NA	NA	-0.259021
AA464139	-0.342151	-0.615857	-0.628458	-0.577043	-0.34453	-0.0569779	-0.689886	-0.575933	-0.318497	0.38758	-0.189116	0.125665	-0.881895	-0.558919	-0.811928	-0.755469
AA464139	-0.441294	-0.48845	-0.59029	-0.64152	-0.269228	-0.0300964	-0.70826	-0.500941	-0.174371	0.253004	-0.0366235	0.0631938	-0.984422	-0.574359	-0.914366	-0.611237
H09936	-0.250962	NA	-0.314213	-0.627512	NA	NA	-0.37473	-1.03033	NA	0.683844	NA	NA	NA	NA	NA	NA
H09936	-0.0565835	NA	-0.584963	-0.706672	NA	NA	-0.34825	-0.965057	NA	0.677546	NA	NA	NA	NA	NA	NA
H16824	-0.0143553	NA	-0.306457	-0.681074	NA	NA	-0.568284	-1.02528	NA	NA	-0.303192	-0.359896	0.32577	NA	NA	NA
H16824	NA	NA	-0.475085	-0.785202	NA	NA	-0.524955	-1.02707	NA	-0.773996	-0.341434	-0.394718	0.0658021	NA	-0.226509	NA
AA436409	-0.488017	-0.897477	-0.172942	-0.370759	NA	NA	-0.0217741	-0.35788	0.0285692	NA	-0.134157	-0.056628	-0.0281635	-0.117669	-0.431794	-0.108653
AA436409	-0.45991	-0.964578	-0.248895	-0.264472	NA	NA	0.0227572	-0.396434	-0.0122436	-0.068291	-0.263776	-0.0950537	0.0631584	-0.0743322	-0.41864	-0.0551165
PM0014	NA	NA	NA	-0.214125	NA	NA	0.0932527	-0.731183	NA	NA	NA	NA	NA	NA	NA	NA
PM0014	NA	NA	NA	NA	NA	NA	0.152003	-0.457682	NA	NA	NA	NA	NA	NA	-0.20581	NA
AA456295	NA	NA	-0.294764	-0.630694	NA	NA	-0.227819	-0.8782	NA	NA	-0.167786	-0.359896	0.707064	1.57319	0.193246	1.42639
AA456295	NA	NA	-0.298706	-0.49788	NA	NA	-0.26748	-0.879959	NA	-0.522725	-0.226509	-0.405639	0.735353	1.59661	0.367732	0.890122
AA041400	-0.232363	-0.23007	-0.652403	-0.388824	NA	-0.0893991	-0.329554	-0.733323	0.0513012	0.741902	-0.184005	-0.193374	0.432315	1.0251	0.434906	0.865699
AA041400	-0.360429	-0.229917	-0.651109	-0.40682	NA	-0.2848	-0.351081	-0.754755	0.0672502	0.698919	-0.0767309	-0.0543718	0.500627	0.991858	0.451975	0.946282
H29315	NA	NA	NA	NA	NA	NA	NA	NA	NA	NA	NA	NA	NA	NA	-0.227601	-0.178337
H29315	NA	NA	NA	NA	NA	NA	NA	NA	NA	NA	NA	NA	NA	NA	NA	-0.222392
H68107	NA	NA	NA	NA	NA	NA	0.118151	NA	NA	NA	NA	NA	NA	NA	NA	NA
H68107	NA	NA	NA	NA	NA	NA	0.342175	NA	NA	NA	NA	NA	NA	NA	NA	NA
R22790	NA	NA	-0.344828	-1.07452	NA	NA	-0.550693	-1.30631	NA	NA	-0.505891	-0.0191088	NA	1.16779	NA	1.14538
R22790	NA	NA	-0.385891	-1.07306	NA	NA	-0.522126	-1.27772	NA	NA	-0.63846	-0.263034	NA	0.908172	0.00757322	1.45843
AA029497	0.351812	NA	-0.0682182	-0.192645	NA	NA	0.0251786	-0.31874	NA	0.370838	NA	-0.0925313	NA	NA	NA	-0.804604
AA029497	0.337409	-0.00627715	-0.127216	-0.23816	NA	NA	0.10931	-0.344314	NA	0.551067	-0.00958605	-0.0792267	NA	NA	NA	-0.495695
AA608514	0.456415	0.331938	0.350036	0.267603	0.567952	0.150222	0.307146	-0.146768	0.374927	1.04684	0.0938388	0.377862	0.836515	1.24271	0.746541	0.961598
AA608514	0.520824	0.241974	0.369325	0.19035	0.582877	0.265192	0.324589	-0.100168	0.415488	1.02192	0.168549	0.3224	0.794648	1.24632	0.69534	0.945015
AA481067	-0.191898	-0.776658	-0.474314	-0.633576	NA	NA	-0.531534	-0.989647	NA	-0.00480099	-0.304345	-0.550491	0.148264	0.0784533	0.296503	0.0872249
AA481067	-0.235955	-0.385891	-0.498736	-0.664879	NA	NA	-0.503534	-0.974365	NA	NA	-0.29116	-0.528218	0.093223	0.0715941	0.295128	0.00656269
T72398	NA	NA	NA	NA	NA	NA	-0.0749621	NA	NA	NA	NA	NA	NA	NA	NA	NA
T72398	NA	NA	NA	NA	NA	NA	NA	NA	NA	NA	NA	NA	NA	NA	NA	NA
AA598629	-0.18932	-0.313111	-0.0149862	-0.14195	0.0985229	-0.136689	0.0793259	-0.354931	0.0539628	0.554087	-0.0226426	0.10862	1.0984	1.31266	1.23158	1.45514
AA598629	-0.171731	-0.385991	-0.0214633	-0.113952	0.0622154	-0.110394	0.118237	-0.354337	0.165059	0.618019	-0.0566177	0.115656	1.08122	1.29271	1.2691	1.47337
AA497029	0.413075	0.076682	0.164925	0.276716	NA	0.269454	0.235654	-0.0238894	0.600444	1.12124	0.210646	0.441905	0.380219	-1.09275	0.330331	-1.18094
AA497029	0.404032	0.055118	0.173192	0.301017	0.565119	0.36798	0.240727	-0.0229658	0.517366	1.07932	0.263483	0.49246	0.384349	-1.06816	0.483454	-1.13481
H28973	-0.438384	-0.820571	-0.797795	-0.812614	-0.231183	-0.642638	-0.576065	-0.983759	-0.311515	0.0639863	-0.629602	-0.504004	0.368461	0.33376	0.445299	0.309203
H28973	-0.454732	-0.762408	-0.787149	-0.82687	-0.257969	-0.644507	-0.531952	-0.9968	-0.331797	0.372932	-0.554113	-0.463597	0.39804	0.273165	0.332506	0.290411
AA599158	-0.338169	-0.536119	-0.314158	-0.532165	-0.0112565	-0.295622	-0.377647	-0.695446	NA	0.779653	-0.18262	0.0324701	-0.13573	-0.483465	-0.577674	-0.911562
AA599158	-0.37131	-0.644464	-0.424459	-0.288471	0.026967	NA	-0.337601	-0.783529	0.0287365	0.835369	-0.0782979	-0.0875712	-0.151299	-0.377535	-0.30422	-0.901645
AA496787	-0.0255351	-0.184809	0.115245	-0.0658049	NA	NA	0.0335642	-0.502387	NA	NA	0.263188	0.292559	0.0625743	0.101741	-0.0346138	-0.00377999
AA496787	-0.0770762	-0.41864	-0.034291	-0.0908072	NA	NA	0.0711355	-0.494422	NA	0.230613	0.161015	-0.0882181	0.0632818	0.0578699	-0.0383811	-0.0304869
N30191	NA	NA	NA	NA	NA	NA	NA	NA	NA	NA	NA	NA	NA	NA	NA	NA
N30191	NA	NA	NA	NA	NA	NA	NA	NA	NA	NA	NA	NA	NA	NA	NA	NA
AA496902	NA	NA	NA	NA	NA	NA	NA	NA	NA	NA	NA	NA	NA	NA	NA	NA
AA496902	NA	NA	NA	NA	NA	NA	NA	NA	NA	NA	NA	NA	NA	NA	NA	NA
AA521243	NA	NA	NA	NA	NA	NA	NA	NA	NA	-0.389567	NA	NA	NA	NA	NA	NA
AA521243	NA	NA	NA	NA	NA	NA	NA	NA	NA	NA	NA	NA	NA	NA	NA	NA
AA496804	-0.0351894	-0.459322	-0.833151	-0.570149	0.054023	-0.276709	-0.400483	-0.775414	NA	0.670123	-0.433231	-0.585371	-0.280937	-0.539408	NA	-1.13313
AA496804	-0.0914581	-0.475075	-0.7132	-0.689208	-0.0341482	-0.183122	-0.385805	-0.806808	NA	0.597112	-0.452985	-0.505465	-0.248576	-0.428712	NA	-0.698959
AA150918	0.091763	NA	NA	NA	NA	NA	NA	NA	NA	NA	0	NA	NA	NA	NA	NA
AA150918	-0.115477	NA	NA	NA	NA	NA	NA	NA	NA	-1.18481	NA	-0.0143553	NA	NA	NA	NA
AA482243	-0.426428	-0.706708	-0.0534996	-0.0855857	NA	NA	0.0743572	-0.132192	0.101695	0.830657	-0.0897104	0.28326	0.579764	0.623276	0.785497	0.858771
AA482243	-0.386261	-0.568843	-0.171969	-0.0550669	0.342966	NA	0.111429	-0.133361	0.104899	0.636002	-0.149402	0.199834	0.572357	0.574472	0.709286	0.748364
AA236164	-0.11834	-0.437037	-0.280108	-0.574047	-0.0330583	NA	-0.0799598	-0.949331	NA	-0.294743	-0.338211	-0.172316	NA	NA	-0.329308	NA
AA236164	-0.189936	-0.756546	-0.220753	-0.537266	NA	-0.20581	-0.111239	-0.898084	NA	NA	-0.311281	-0.246591	NA	NA	-0.201634	NA
AA487582	NA	NA	0.450234	0.158303	NA	NA	-0.215002	0.0166994	NA	NA	-0.188445	-0.157459	0.00480099	0.0320612	-0.148614	-0.570908
AA487582	NA	NA	0.224452	0.183903	NA	NA	-0.19944	-0.0341731	NA	NA	-0.13493	-0.0551416	NA	-0.122114	-0.238555	-0.453572
AA150687	NA	NA	-0.301569	-0.471609	NA	NA	-0.259387	-1.03009	NA	NA	-0.40543	-0.22184	NA	NA	-0.34861	-0.250962
AA150687	-0.449186	NA	-0.421701	-0.596644	NA	NA	-0.373197	-0.868661	NA	NA	-0.297266	-0.16606	NA	NA	NA	NA
AA278698	NA	NA	-0.209973	-0.862941	NA	NA	-0.760932	-1.16993	NA	NA	NA	NA	NA	-0.184809	-0.695994	-0.659925
AA278698	NA	NA	-0.607232	-0.996795	NA	NA	-0.512713	-1.19114	NA	NA	NA	NA	NA	NA	-0.681074	-1.08179
AA425666	NA	NA	-0.440712	-0.764446	NA	NA	-0.293341	-0.932442	NA	NA	-0.273392	-0.633827	0.369088	0.410351	0.278417	0.184154
AA425666	NA	NA	-0.531246	-0.633728	NA	NA	-0.481565	-0.941471	NA	NA	-0.394821	-0.285244	0.411106	0.467549	0.217987	0.387649
AA281549	-0.102881	-0.554321	-0.184113	-0.0461129	0.124071	-0.307775	-0.100204	-0.354074	-0.143186	0.301767	-0.152421	-0.183754	0.203638	0.628062	0.524662	0.742754
AA281549	-0.165604	-0.449426	-0.214801	-0.110857	-0.0973481	-0.269607	-0.127173	-0.377916	-0.0208499	0.445328	-0.169409	-0.149669	0.205138	0.64771	0.550018	0.730619
AA485141	-0.0222987	NA	NA	NA	NA	NA	NA	NA	NA	NA	NA	NA	NA	NA	NA	NA
AA485141	-0.0723307	NA	NA	NA	NA	NA	NA	NA	NA	NA	NA	NA	NA	NA	NA	NA
AA458807	-0.342248	NA	-0.353876	-0.287197	NA	NA	-0.16804	-0.450498	NA	-0.495365	-0.270792	-0.086176	-0.357862	-0.682314	-0.290719	-0.696521
AA458807	-0.414425	NA	-0.347467	-0.206326	NA	NA	-0.143093	-0.477475	NA	NA	-0.223496	-0.0941025	-0.300075	-0.74836	-0.139606	-0.705134
AA488622	-0.264629	NA	NA	-0.47783	NA	NA	-0.343812	-0.991685	NA	-1.05658	NA	NA	NA	NA	NA	-0.559084
AA488622	-0.0995357	NA	NA	-0.518758	NA	NA	-0.464182	-0.946918	NA	NA	NA	NA	NA	NA	-0.135883	-0.450661
AA702013	NA	NA	NA	-0.37177	NA	NA	NA	-0.0332762	NA	NA	NA	NA	NA	NA	NA	1.6523
AA702013	0.244538	NA	NA	-0.335349	NA	NA	NA	-0.197446	NA	NA	NA	-0.0285692	NA	NA	NA	1.41684
W69790	NA	NA	NA	-0.115477	NA	NA	-0.447138	-0.722466	NA	NA	NA	NA	NA	1.36923	NA	1.28688
W69790	NA	NA	NA	-0.111031	NA	NA	-0.363638	-0.669027	NA	NA	NA	NA	NA	1.2967	NA	1.29082
AA663995	-0.0495184	-0.379042	-0.310835	-0.419177	0.18108	-0.477557	-0.204941	-0.794205	0.175564	0.420082	NA	0.0751015	-0.163499	-0.0885939	-0.701919	-1.1592
AA663995	-0.0309511	-0.445367	-0.193167	-0.478966	0.0683657	-0.488916	-0.15268	-0.712117	NA	NA	0.138383	-0.124109	-0.0658021	-0.242857	-0.78799	-0.863938
AA063637	-0.364254	-0.0931094	0.0361666	-0.150932	NA	NA	-0.0127948	-0.295968	-0.0703893	0.606989	-0.110352	0.0436382	0.273761	-0.32252	0.265753	-0.368073
AA063637	-0.283196	NA	-0.00903884	-0.141483	0.0931094	NA	0.0458547	-0.267916	-0.058103	NA	-0.0441958	0.123198	0.299588	-0.356236	0.476305	-0.434742
AA476438	-0.711189	-0.722466	-0.601682	-0.528283	-0.337501	NA	-0.234031	-0.696019	NA	NA	-0.462343	-0.249889	-0.582262	-1.94251	-0.563541	-1.91902
AA476438	-0.542184	-0.193246	-0.629034	-0.590629	-0.329392	NA	-0.309274	-0.714547	NA	0.698959	-0.58852	-0.231938	-0.614418	-1.95109	-0.277812	-2.07563
AA668595	-0.431716	NA	-0.00766883	-0.285214	NA	NA	0.187764	-0.627236	NA	0.196028	-0.333285	-0.497276	-0.461871	-0.119894	-0.407764	-0.232817
AA668595	-0.343839	NA	-0.139664	-0.278194	NA	NA	-0.166856	-0.643799	NA	NA	-0.235281	-0.381013	-0.486968	-0.0982441	-0.565265	-0.240273
AA453410	NA	NA	NA	0.51334	NA	NA	0.428907	0.403633	NA	NA	NA	NA	NA	NA	-0.340567	0.133125
AA453410	NA	NA	NA	0.565597	NA	NA	0.589384	0.0972972	NA	NA	NA	NA	NA	NA	NA	NA
T41177	-0.111031	NA	NA	-0.485076	NA	NA	-0.303649	-1.01838	NA	NA	NA	NA	NA	NA	NA	NA
T41177	NA	NA	NA	-0.47429	NA	NA	-0.151271	-0.760189	NA	NA	NA	NA	NA	NA	-0.250962	NA
H78385	-0.424555	-0.565118	-0.598942	-0.445498	-0.239791	-0.222997	-0.370341	-0.690002	NA	NA	-0.302875	-0.283745	0.0288173	0.331337	0.00372693	-0.0454178
H78385	-0.365348	-0.66714	-0.532718	-0.492029	NA	-0.517848	-0.387645	-0.73956	-0.18619	NA	-0.400538	-0.316027	-0.0286416	0.274033	0	0.0469045
AA446453	-0.335974	-0.686297	-0.116811	-0.0367041	0.18717	-0.224215	0.0393034	-0.221729	-0.0810366	0.561599	0.017184	0.26214	0.786774	0.561691	0.851169	0.564051
AA446453	-0.296291	-0.64222	-0.0100853	0.000538319	0.0720372	-0.128813	0.0546111	-0.201043	-0.125258	0.803788	0.00798768	0.303975	0.777272	0.545643	0.799922	0.509334
AA620477	-0.480704	NA	0.119719	0.173175	NA	NA	0.173608	-0.0896754	NA	NA	0.160766	0.351174	-0.794787	-1.04962	-0.712137	-1.10779
AA620477	-0.504397	NA	0.0254279	0.228805	NA	NA	0.225318	-0.148555	NA	NA	0.213731	0.198941	-0.818859	-1.06565	-0.562495	-0.915321
T64880	NA	NA	-0.0707731	-0.442767	NA	NA	-0.127591	-1.05717	NA	NA	NA	NA	NA	NA	NA	NA
T64880	NA	NA	-0.00480099	-0.412578	NA	NA	-0.0861734	-0.930523	NA	NA	NA	NA	NA	NA	NA	NA
AA400329	-0.329953	NA	-0.774168	-0.782409	NA	NA	-0.326661	-1.01341	NA	NA	-0.496538	-0.328454	NA	NA	0.0345384	NA
AA400329	-0.302959	-0.671946	-0.742842	-0.835613	NA	NA	-0.575729	-1.09954	NA	-0.218265	-0.375799	-0.333672	NA	NA	-0.589044	NA
AA143559	NA	NA	-0.423808	-0.635692	NA	NA	-0.349953	-0.793611	NA	NA	-0.0885939	-0.111361	0.184809	0.344828	0.665801	NA
AA143559	NA	NA	-0.40184	-0.651776	NA	NA	-0.356253	-0.862743	NA	NA	-0.143544	-0.284303	0.475085	0.464668	0.374558	0.145781
AA629558	0.446892	0.592486	0.119831	0.18374	0.72722	NA	0.232782	-0.143564	0.488231	1.28714	-0.00807968	0.654957	-0.756555	0.284307	-0.93524	-0.244981
AA629558	0.474539	0.249259	0.11593	0.154885	0.750171	0.347642	0.191225	-0.162726	0.518071	1.35055	0.131639	0.658363	-0.763336	0.204627	-1.22437	-0.208004
N63398	NA	NA	NA	NA	NA	NA	NA	NA	NA	NA	NA	NA	NA	NA	NA	NA
N63398	NA	NA	NA	NA	NA	NA	NA	NA	NA	NA	NA	NA	NA	NA	NA	NA
AA700005	NA	0.15056	NA	NA	NA	0.00958605	NA	NA	NA	NA	NA	NA	NA	NA	NA	NA
AA700005	NA	-0.10164	NA	NA	NA	NA	NA	NA	NA	NA	NA	NA	NA	NA	NA	NA
AA180013	NA	NA	NA	-0.736277	NA	NA	-0.48353	-0.961879	NA	NA	NA	NA	NA	NA	NA	NA
AA180013	NA	NA	NA	-0.624663	NA	NA	-0.31824	-0.871219	NA	NA	NA	NA	NA	NA	NA	NA
N73625	-0.0703893	NA	-0.250489	-0.706143	NA	NA	-0.331903	-0.963749	NA	-0.115477	-0.418535	-0.218424	NA	NA	NA	NA
N73625	-0.0795203	NA	-0.374066	-0.743328	NA	NA	-0.409473	-0.917538	NA	NA	-0.285859	-0.133267	NA	NA	NA	NA
H51549	0.133203	-0.547119	0.0157673	-0.000335004	0.0885939	NA	0.18104	-0.276817	NA	0.678543	0.18701	0.276048	-0.031602	0.293642	0.0342544	-0.280987
H51549	-0.046958	-0.275328	0.116991	-0.0975115	NA	NA	0.161517	-0.257945	0.184257	0.630912	0.184339	0.176186	0.00348899	0.324751	0.127469	0.0309603
AA400474	0.0287317	NA	NA	NA	NA	NA	NA	NA	NA	NA	NA	NA	NA	NA	NA	NA
AA400474	0.119739	NA	NA	NA	NA	NA	NA	NA	NA	NA	NA	NA	NA	NA	NA	NA
AA668726	NA	NA	NA	-0.38758	NA	NA	-0.180813	-0.475473	NA	NA	NA	NA	NA	NA	NA	NA
AA668726	NA	NA	NA	-0.374808	NA	NA	-0.258176	-0.333126	NA	-0.209973	NA	NA	NA	NA	NA	NA
AA157955	0.219176	-0.0970987	0.198407	0.412876	0.209973	0.138346	0.341478	0.19445	0.584963	0.834234	0.450158	0.488653	0.411814	-0.0495672	0.342281	-0.30825
AA157955	-0.0117336	-0.31988	0.34708	0.399975	0.464668	NA	0.315251	0.13584	0.60506	1.04076	0.430163	0.706907	0.372325	-0.170398	0.416363	-0.300222
AA400476	NA	NA	NA	NA	NA	NA	NA	NA	NA	NA	NA	NA	NA	NA	NA	-0.0885939
AA400476	NA	NA	NA	NA	NA	NA	NA	NA	NA	NA	NA	NA	NA	NA	NA	NA
AA027042	0.268538	-0.109593	0.0196155	0.0775903	0.366455	0.0198721	0.234509	-0.0188845	0.134522	0.7833	0.0576568	0.0338336	0.0141269	0.066769	0.184425	0.148863
AA027042	0.280057	-0.105323	0.040353	0.110549	0.446167	0.152761	0.202703	-0.114415	0.194359	0.713178	0.056469	0.0445753	-0.00133769	0.133973	0.222558	0.0728888
AA496334	0.627987	0.370047	-0.275235	-0.652627	0.681327	0.348219	-0.321928	-0.857598	0.240113	0.607092	-0.095759	-0.632671	0.318076	0.522725	0.559084	1.74048
AA496334	0.638009	0.390043	-0.242237	-0.600634	0.644519	0.381717	-0.24707	-0.907035	0.231816	0.711841	-0.174029	-0.452398	0.519374	0.728283	0.278976	1.70293
AA406040	0.890035	0.742938	-0.238246	-0.130269	0.80392	0.679332	0.0113264	-0.257973	0.578247	1.08675	-0.192645	0.131052	0.234349	0.995901	0.166334	1.05749
AA406040	0.841888	0.704195	-0.100081	-0.142296	0.942561	0.704781	-0.0689771	-0.12074	0.537469	1.17708	-0.0988699	-0.00194041	0.256126	0.983188	0.381695	0.764425
N23898	-0.151427	-0.634539	0.908433	1.05916	0.0365746	-0.192645	0.818968	0.442541	-0.184425	0.45303	0.106572	0.549258	0.119909	1.66448	NA	1.25096
N23898	-0.145529	-0.628031	1.08049	0.999356	0.0322934	-0.0604208	0.742482	0.45629	-0.161866	0.467196	0.218265	0.659925	0.163499	1.69302	-0.00480099	1.22651
H51554	-0.482636	NA	-0.0916998	-0.0470742	-0.195016	-0.193246	0.0914775	-0.351149	-0.641078	-0.650765	-0.0554951	-0.15056	NA	NA	NA	0
H51554	-0.428681	-0.872038	-0.0690416	-0.197474	-0.251979	NA	0.207039	-0.271155	-0.525746	0.123575	0.012824	-0.0576386	0.141869	NA	-0.259021	0.169925
AA028921	-0.457682	NA	-0.656909	-0.954214	NA	NA	-0.483596	-1.40244	NA	NA	-0.580624	-0.733421	0.0217314	-1.13858	-0.267772	-1.19535
AA028921	-0.0612002	-0.193246	-0.45696	-1.04667	NA	NA	-0.557583	-1.42453	NA	NA	-0.530515	-0.828474	-0.096522	-1.16414	-0.0871608	-1.18269
AA122287	-0.34861	NA	NA	NA	NA	NA	-0.172061	-0.234706	NA	NA	NA	NA	NA	NA	NA	NA
AA122287	-0.254997	NA	NA	NA	NA	NA	NA	NA	NA	-0.341037	NA	NA	NA	NA	NA	NA
AA620859	-0.468769	NA	NA	-0.509014	-0.0379679	NA	-0.0670029	-0.794971	NA	0.143568	NA	NA	NA	NA	NA	-0.0379679
AA620859	-0.518031	-0.793549	NA	-0.299973	NA	NA	-0.190943	-0.867087	NA	0.351222	NA	NA	NA	NA	-0.0238467	NA
N59206	-0.648881	-0.731406	-0.745427	-1.04323	-0.0285692	-0.475085	-0.664002	-1.20273	-0.20581	0.135173	-0.578913	-0.636555	0.0090565	-0.155011	-0.241578	-0.464075
N59206	-0.409406	-0.677859	-0.830889	-0.838363	-0.244367	-0.137504	-0.694374	-1.33496	-0.525741	-0.030675	-0.541581	-0.746927	-0.00794	-0.148523	-0.418666	-0.349262
AA133577	-0.301795	-0.171167	-0.252465	-0.452744	NA	-0.116514	-0.51964	-0.805987	NA	0.347065	0.0469465	-0.238121	-0.606118	-0.0885994	-0.895366	-0.562287
AA133577	-0.17905	-0.246752	-0.277843	-0.304159	0.130545	-0.14943	-0.462343	-0.794853	-0.379974	0.191253	-0.0246126	-0.176878	-0.420576	-0.155241	-1.12703	-0.263034
AA397823	NA	NA	NA	-0.772692	NA	NA	-0.503595	-0.719549	NA	NA	NA	NA	NA	NA	NA	NA
AA397823	-0.294977	NA	NA	-0.742725	NA	NA	-0.590426	-0.267036	NA	NA	NA	NA	NA	NA	NA	NA
AA609609	-0.481167	-0.278976	-0.32533	-0.30706	NA	NA	-0.227313	-0.7176	NA	NA	-0.049753	-0.186637	0.742725	1.53874	0.325504	1.252
AA609609	-0.519195	-0.329602	-0.376756	-0.317958	NA	NA	-0.298642	-0.742265	NA	-0.367371	NA	-0.0795203	0.742504	1.49715	0.468709	1.35663
EMPTY	NA	NA	NA	NA	NA	NA	NA	NA	NA	NA	NA	NA	NA	NA	NA	NA
EMPTY	NA	NA	NA	NA	NA	NA	NA	NA	NA	NA	NA	NA	NA	NA	NA	NA
EMPTY	NA	NA	NA	NA	NA	NA	NA	NA	NA	NA	NA	NA	NA	NA	NA	NA
EMPTY	NA	NA	NA	NA	NA	NA	NA	NA	NA	NA	NA	NA	NA	NA	NA	NA
EMPTY	NA	NA	NA	NA	NA	NA	NA	NA	NA	NA	NA	NA	NA	NA	NA	NA
EMPTY	NA	NA	NA	NA	NA	NA	NA	NA	NA	NA	NA	NA	NA	NA	NA	NA
EMPTY	NA	NA	NA	NA	NA	NA	NA	NA	NA	NA	NA	NA	NA	NA	NA	NA
EMPTY	NA	NA	NA	NA	NA	NA	NA	NA	NA	NA	NA	NA	NA	NA	NA	NA
EMPTY	NA	-0.124328	NA	NA	NA	NA	NA	NA	NA	-0.500845	NA	NA	NA	NA	NA	NA
EMPTY	NA	-0.47854	NA	NA	NA	NA	NA	NA	NA	NA	NA	NA	NA	NA	NA	NA
EMPTY	NA	NA	NA	NA	NA	NA	NA	NA	NA	-0.681074	NA	NA	NA	NA	NA	NA
EMPTY	NA	NA	NA	NA	NA	NA	NA	NA	NA	NA	NA	NA	NA	NA	NA	NA
EMPTY	0.178957	0.209622	NA	NA	0.00086108	-0.169743	NA	NA	-0.0357106	0.00597713	NA	NA	NA	NA	NA	NA
EMPTY	0.348706	0.316909	NA	NA	-0.000353385	-0.205597	NA	NA	-0.23239	0.00846931	NA	NA	NA	NA	NA	NA
EMPTY	NA	NA	NA	NA	NA	NA	NA	NA	NA	NA	NA	NA	NA	NA	NA	NA
EMPTY	NA	NA	NA	NA	NA	NA	NA	NA	NA	NA	NA	NA	NA	NA	NA	NA
T67128	-0.242013	-0.707258	-1.38375	-1.76913	-0.0991607	-0.249632	-1.12624	-1.92218	-0.0484101	0.496205	-1.08179	-1.168	0.945339	0.423855	0.876752	0.158031
T67128	-0.313261	-0.681077	-1.47419	-1.74692	NA	-0.222771	-1.16066	-1.90526	0.0478716	0.59737	-1.14576	-1.24145	0.929257	0.461331	0.534798	0.409654
AA046701	-0.271183	-0.552048	-0.0678645	0.0575422	NA	-0.0114048	0.132704	0.0273137	0.167848	0.412712	0.140492	0.294873	-0.134031	0.0753632	0.056206	0.372736
AA046701	-0.231287	-0.605647	-0.0369382	0.0443364	0.169925	-0.255748	0.240104	-0.006079	0.115012	0.741864	0.125355	0.202052	-0.170294	0.0950085	0.116683	0.365409
R40446	-0.0130477	-0.492084	NA	-0.227234	0.217905	-0.14341	-0.0897797	-0.718229	0.0744462	0.461976	NA	NA	NA	NA	NA	NA
R40446	-0.0390092	-0.36257	NA	-0.213969	0.316857	-0.201802	-0.0858688	-1.04731	0.133769	0.250925	NA	NA	NA	NA	NA	NA
AA629542	-0.0485193	-0.353091	NA	NA	0.127953	-0.130687	0.0676109	-0.385891	0.193532	0.706454	NA	NA	NA	NA	NA	NA
AA629542	-0.0454079	-0.250861	NA	-0.0379679	0.18893	-0.12753	-0.0337094	-0.154886	0.0375061	0.172016	NA	NA	NA	NA	NA	NA
R63407	-0.0202132	NA	NA	NA	NA	NA	NA	NA	NA	NA	NA	NA	NA	NA	NA	-0.124328
R63407	-0.0440328	NA	NA	NA	NA	NA	NA	NA	NA	-0.578536	NA	NA	NA	NA	NA	NA
H25229	-0.0644241	-0.191678	-0.0867323	-0.068387	0.420938	0	-0.00318125	-0.102035	0.438484	0.632268	-0.0749621	-0.0886852	NA	NA	NA	-0.559084
H25229	-0.0390347	-0.174938	-0.0858362	0.0787916	NA	0.124328	0.214851	-0.240816	0.398933	0.731183	NA	-0.0208085	NA	NA	0	-0.656878
AA284108	-0.347891	-0.480648	-0.593169	-0.62479	-0.00734455	-0.457657	-0.39637	-0.999734	-0.144486	0.608374	-0.517213	-0.478134	0.174797	0.41239	0.219826	-0.00148962
AA284108	-0.438627	-0.577056	-0.684592	-0.600934	0.124263	-0.505312	-0.357341	-1.00397	-0.201226	0.607129	-0.460058	-0.495104	0.217059	0.426224	0.14806	0.0435754
T69767	-0.205142	-0.17322	-0.54581	-0.482824	0.139466	-0.0403014	-0.558388	-0.810305	-0.00804479	-0.406241	-0.264323	-0.270981	0.356144	0.314213	NA	0.465959
T69767	-0.24731	-0.126846	-0.746574	-0.0565835	0.235722	-0.146841	NA	-0.970854	0.053581	NA	-0.385891	-0.287777	0.443607	0.318076	NA	0.40982
EMPTY	NA	NA	NA	NA	NA	NA	NA	NA	NA	NA	NA	NA	NA	NA	NA	NA
EMPTY	NA	NA	NA	NA	NA	NA	NA	NA	NA	NA	NA	NA	NA	NA	NA	NA
EMPTY	NA	NA	NA	NA	NA	NA	NA	NA	NA	NA	NA	NA	NA	NA	NA	NA
EMPTY	NA	NA	NA	NA	NA	NA	NA	NA	NA	-0.0238467	NA	NA	NA	NA	NA	NA
EMPTY	NA	NA	NA	NA	NA	NA	NA	NA	NA	NA	NA	NA	NA	NA	NA	NA
EMPTY	NA	NA	NA	NA	NA	NA	NA	NA	NA	NA	NA	NA	NA	NA	NA	NA
EMPTY	NA	NA	NA	NA	NA	NA	NA	NA	NA	NA	NA	NA	NA	NA	NA	NA
EMPTY	NA	NA	NA	NA	NA	NA	NA	NA	NA	-0.529405	NA	NA	NA	NA	NA	NA
EMPTY	NA	NA	NA	NA	NA	NA	NA	NA	NA	NA	NA	NA	NA	NA	NA	NA
EMPTY	NA	NA	NA	NA	NA	NA	NA	NA	NA	NA	NA	NA	NA	NA	NA	NA
EMPTY	NA	NA	NA	NA	NA	NA	NA	NA	NA	NA	NA	NA	NA	NA	NA	NA
EMPTY	NA	NA	NA	NA	NA	NA	NA	NA	NA	NA	NA	NA	NA	NA	NA	NA
EMPTY	NA	NA	NA	NA	NA	NA	NA	NA	NA	NA	NA	NA	NA	NA	NA	NA
EMPTY	NA	NA	NA	NA	NA	NA	NA	NA	NA	NA	NA	NA	NA	NA	NA	NA
EMPTY	NA	NA	NA	NA	NA	NA	NA	NA	NA	NA	NA	NA	NA	NA	NA	NA
EMPTY	NA	NA	NA	NA	NA	NA	NA	NA	NA	NA	NA	NA	NA	NA	NA	NA
R96264	NA	NA	NA	NA	NA	NA	NA	NA	NA	NA	NA	NA	NA	NA	NA	NA
R96264	-0.318396	NA	NA	NA	NA	NA	NA	NA	NA	NA	NA	NA	NA	NA	NA	NA
R21170	0.0419418	NA	NA	NA	NA	NA	0.361208	NA	NA	NA	NA	NA	NA	NA	NA	NA
R21170	-0.134542	NA	NA	NA	NA	NA	NA	NA	NA	NA	NA	NA	NA	NA	NA	NA
AA404288	-0.324931	-0.731423	-0.659579	-0.737638	-0.161257	-0.479941	-0.626439	-0.892618	-0.340813	0.214777	-0.505966	-0.491721	0.401165	0.646028	0.0268897	0.132006
AA404288	-0.288278	-0.720378	-0.610398	-0.729233	-0.140464	-0.555051	-0.58629	-0.9925	-0.204478	0.0557042	-0.560715	-0.398148	0.514879	0.570074	-0.187496	-0.233251
W32731	-0.385378	NA	NA	NA	NA	NA	NA	NA	NA	0	NA	NA	NA	NA	NA	NA
W32731	-0.310215	-0.669027	NA	NA	NA	NA	NA	NA	NA	NA	NA	NA	NA	NA	NA	NA
N73551	-0.156786	-0.218434	-0.0430298	-0.00448042	0.320453	0.0702522	-0.0348004	-0.463846	-0.0614005	0.452319	-0.0512805	-0.128873	-1.20163	-0.834576	-1.02857	-2.15546
N73551	-0.0699914	-0.200865	0.0131036	0.0790716	NA	0.17228	-0.127513	-0.588888	-0.0630584	0.38036	0.0643346	-0.208416	-1.24691	-0.863938	-0.874469	-2.08264
T97054	-0.0758581	-0.24953	-0.199309	NA	0.334255	NA	-0.225376	-0.785149	-0.20501	0.0238467	NA	-0.279869	NA	NA	NA	-0.532733
T97054	0.00506506	-0.315329	-0.299894	-0.302563	0.104337	NA	NA	-0.719549	-0.22741	0.445284	NA	-0.343954	NA	NA	NA	-0.454176
AA454176	-0.383217	-0.805006	-0.0592718	-0.10427	-0.0313415	-0.286459	0.0329648	-0.29589	-0.0924969	NA	0.119172	0.226325	0.218729	-0.468149	0.414476	-0.739263
AA454176	-0.388841	-0.892271	0.0390219	-0.148503	0.0506261	-0.331599	0.0592659	-0.183809	0.0849751	0.303108	0.167905	0.261348	0.39379	-0.532733	0.404084	-0.759353
N90335	-0.29298	-0.42564	-0.436848	-0.381347	0.0642973	-0.206596	-0.269831	-0.688542	-0.0683967	0.473298	-0.151338	-0.183844	0.0432532	1.16776	0.105817	1.21849
N90335	-0.228258	-0.357728	-0.352349	-0.359267	0.0164024	-0.201866	-0.258021	-0.679526	-0.0559922	0.44871	-0.242687	-0.170784	0.0393891	1.10936	0.0997578	1.25024
R68360	0.0332762	-0.119206	NA	NA	NA	NA	NA	NA	0.00480099	0.621674	NA	NA	NA	NA	NA	NA
R68360	0.107791	-0.128668	NA	-0.159199	NA	NA	NA	NA	-0.214125	0.608159	NA	NA	NA	NA	NA	NA
R02095	-0.183612	-0.393754	-0.0835066	-0.196124	NA	NA	-0.048363	-0.327053	-0.0238467	0.335966	0.141882	-0.14439	NA	NA	NA	NA
R02095	-0.272054	-0.490986	-0.0811096	-0.257569	NA	NA	-0.0614005	-0.39219	NA	0.234581	0.0526269	-0.133387	NA	NA	NA	NA
AA454215	0.210448	-0.0105692	0.679595	0.122465	0.590016	-0.207385	0.388935	-0.308693	0.586088	0.614683	0.292954	0.119799	2.05177	3.58447	1.96752	4.07927
AA454215	-0.13537	-0.197142	0.633956	0.186323	0.742757	-0.101991	0.359711	-0.394598	0.413814	0.943053	0.44415	0.166222	1.94984	3.61348	2.21259	4.08084
R67562	-0.609642	-0.782639	-1.15914	-1.23305	-0.322362	-0.997275	-0.981283	-1.61537	-0.408626	0.444122	-0.792834	-0.831342	-0.165227	0.0150022	-0.422269	-0.237692
R67562	-0.59168	-0.820291	-1.22136	-1.22307	-0.361668	-0.977755	-0.977386	-1.64933	-0.458028	NA	-0.873069	-0.834665	-0.200086	-0.053835	-0.624099	-0.221306
R26143	-0.296096	-0.347422	-0.586301	-0.333424	0.0569559	NA	-0.0840643	-0.333424	-0.0594329	0.755162	-0.402224	-0.352382	NA	NA	NA	NA
R26143	-0.200261	-0.37401	-0.492947	-0.34861	0.0874628	NA	-0.167786	-0.532733	0.0329983	0.735641	-0.230368	-0.235985	NA	NA	NA	NA
H29064	-0.156558	-0.757327	-0.124744	-0.0682483	0.267635	-0.0649322	0.0931094	-0.399511	0.051504	0.539291	0.0317723	0.121015	0.79693	1.54926	NA	1.56206
H29064	-0.188806	-0.625763	-0.0113026	-0.00765357	0.144705	-0.180813	0.0568623	-0.429044	0.136891	0.596267	-0.0236236	0.0777451	0.813849	1.51602	NA	1.51051
AA701081	0.347568	0.0725487	0.896362	0.596201	1.053	0.873629	0.679319	0.282962	0.940099	1.34702	0.873803	1.0433	0.398436	0.214265	0.706269	0.229413
AA701081	0.357405	0.0504857	0.97208	0.59459	1.08493	0.827952	0.696871	0.31472	1.00668	1.42031	0.906036	1.1788	0.468553	0.301579	0.583958	0.31021
U55962	NA	NA	NA	NA	NA	NA	NA	NA	NA	NA	NA	NA	NA	NA	NA	NA
U55962	NA	-0.0519521	NA	NA	NA	NA	NA	NA	NA	NA	NA	NA	NA	NA	NA	NA
H15662	-0.525894	-0.918945	-0.381736	-0.422857	-0.254331	-0.791363	-0.299989	-0.87568	-0.31472	0.024589	-0.599709	-0.626475	0.325203	-0.0874628	0.336972	-0.135944
H15662	-0.519303	-0.915455	-0.510463	-0.512335	-0.22135	-0.819495	-0.555751	-0.895711	-0.39789	0.320898	-0.573032	-0.573257	0.293632	-0.163499	0.211504	-0.0693552
AA485442	-0.0967903	-0.526538	-0.302196	-0.330593	0.327503	-0.446632	0.103484	-0.86533	-0.0341482	0.499335	-0.122336	-0.211595	-0.485047	-1.11346	-0.923466	-1.45066
AA485442	-0.089966	-0.586981	-0.270311	-0.337035	0.32321	-0.477579	-0.00099325	-0.868622	-0.0124391	0.482716	-0.124317	-0.21614	-0.519912	-1.17393	-0.987927	-1.44537
R38161	-0.231564	-0.634528	-0.0473057	-0.385891	NA	NA	-0.162356	-0.415037	-0.128733	0.343172	NA	NA	NA	NA	NA	NA
R38161	-0.181414	-0.552541	-0.137504	NA	NA	NA	-0.328693	-0.230613	NA	0.298806	NA	NA	NA	NA	NA	NA
AA012939	NA	NA	NA	NA	NA	NA	NA	NA	NA	NA	NA	NA	NA	NA	NA	NA
AA012939	-0.238787	NA	NA	NA	NA	NA	-0.143875	NA	NA	0.197337	NA	NA	NA	NA	NA	NA
N32542	-0.694859	-1.01408	0.109418	0.0577835	-0.0280855	-0.244397	0.317641	-0.16177	-0.0277059	0.357379	0.0575909	0.176856	0.137271	-0.572057	0.656485	-0.266664
N32542	-0.626054	-0.928036	0.0816604	0.030026	0.0574085	-0.260562	0.34255	-0.20966	0.0274405	NA	0.0931094	0.189168	0.313746	-0.677892	0.58746	-0.280309
H15458	NA	NA	NA	NA	NA	NA	NA	NA	NA	NA	NA	NA	NA	NA	NA	NA
H15458	NA	NA	NA	NA	NA	NA	-0.0426443	NA	NA	NA	NA	NA	NA	NA	NA	NA
W79511	-0.321928	-0.585591	-0.259644	-0.15659	-0.198254	NA	0.0686267	-0.164215	-0.137504	NA	-0.0482859	-0.00394179	NA	NA	NA	NA
W79511	-0.402013	-0.458859	-0.226617	0.0361675	-0.0281707	NA	0.147589	-0.291732	-0.122407	0.51204	-0.00650352	-0.0152064	NA	NA	NA	NA
N63733	0.0783747	0.069121	-0.0019077	0.120271	0.465199	0.513933	0.136168	-0.194025	0.907459	1.54417	0.917156	1.06349	1.7425	1.56792	2.06117	1.86372
N63733	0.0598378	0.0828873	0.00155659	0.146511	0.470468	0.498528	0.154434	-0.0926045	0.842489	NA	0.796467	1.12731	1.82731	1.65862	2.01966	1.88097
H38848	-0.0345614	0.233986	-0.340017	-0.265142	0.209125	0.373899	-0.440052	-0.422084	0.186045	1.03577	-0.0191088	-0.172963	-0.222392	2.19124	-0.695994	1.79985
H38848	0.0336892	0.151532	-0.275869	-0.241973	0.447907	0.437561	-0.364428	-0.463822	0.0726845	NA	NA	-0.294649	-0.146221	2.22968	-0.549258	1.89573
H04771	0.057244	-0.189034	NA	NA	NA	NA	NA	NA	NA	NA	NA	NA	NA	NA	NA	NA
H04771	0.00828344	-0.56485	NA	NA	NA	NA	NA	NA	NA	-0.0722561	NA	NA	NA	NA	NA	NA
H00596	-0.151941	-0.254712	-0.560476	-0.659977	0.11072	-0.185502	-0.345084	-0.926063	-0.0101693	0.426426	-0.192858	-0.318236	-0.0021711	0.472171	-0.144597	0.153725
H00596	-0.121321	-0.358974	-0.636715	-0.671978	0.119142	-0.343463	-0.498947	-0.855984	-0.0169353	0.307641	-0.303069	-0.375401	-0.0171242	0.128986	0.084624	0.382829
R82802	0.0321758	-0.15631	-0.221916	-0.130098	0.287427	0.0165916	-0.162991	-0.459969	0.275003	0.969378	-0.0460824	0.180015	0.00753367	0.591768	-0.336363	0.354987
R82802	0.0464082	-0.0827393	-0.190462	-0.237898	0.387566	-0.0876104	-0.153686	-0.398325	0.284099	0.857419	-0.00433894	0.0790282	0.0334838	0.521397	-0.280759	0.407806
AA463445	-0.11556	-0.0219661	-0.778349	-0.758403	-0.0536637	0.0682086	-0.502788	-0.995751	0.240024	NA	-0.143612	0.0911479	NA	0.773996	NA	0.588165
AA463445	-0.0644049	-0.0622613	-0.775245	-0.658129	-0.0147466	-0.0317089	-0.593	-0.995085	0.178122	0.539774	-0.150731	0.0316096	NA	NA	NA	0.584963
AA490338	NA	NA	NA	NA	NA	NA	NA	NA	NA	NA	NA	NA	NA	NA	NA	NA
AA490338	0.0648511	NA	NA	NA	NA	NA	-0.146221	NA	NA	NA	NA	NA	NA	NA	NA	NA
AA262804	-0.0999414	-0.0678315	NA	NA	NA	NA	NA	NA	NA	-0.0285692	-0.267284	-0.222392	NA	NA	NA	NA
AA262804	-0.117815	-0.157541	NA	NA	NA	NA	NA	NA	NA	0.00838779	-0.164204	-0.307131	NA	NA	NA	NA
AA148542	0.172927	0.121611	-0.651628	-0.260914	0.135598	-0.184262	-0.589212	-0.871337	-0.139051	0.632452	-0.506401	-0.858845	0.703543	1.69076	NA	1.25496
AA148542	0.129627	0.0192527	-0.512626	-0.47938	0.246348	-0.0934509	-0.489805	-0.733925	-0.0753451	0.511288	-0.481835	-0.691148	0.684086	1.48284	NA	1.20039
R43271	-0.0682312	-0.258221	0.302783	0.580643	0.65252	0.569943	0.7258	0.365887	0.363714	0.943416	0.269921	0.27154	0.804604	1.73077	0.899143	1.98409
R43271	0.00692848	-0.226195	0.445614	0.532146	0.642507	0.500173	0.709625	0.369191	0.233295	-0.475085	0.324811	0.334235	0.982513	1.73315	0.90669	2.16819
T49576	NA	NA	NA	NA	NA	NA	NA	NA	NA	NA	NA	NA	NA	NA	NA	NA
T49576	NA	NA	NA	NA	NA	NA	NA	NA	NA	NA	NA	NA	NA	NA	NA	NA
H10995	-0.284983	-0.739125	-0.0117656	-0.326094	0.317319	-0.219586	0.219169	-0.516274	0.155288	0.544418	-0.118395	-0.16811	0.884746	0.982334	1.10584	1.1423
H10995	-0.210984	-0.746963	-0.0405636	-0.288099	0.326834	-0.270211	0.215729	-0.523292	0.0669149	0.625238	-0.162798	-0.110121	0.829681	1.05972	1.12376	1.15456
R42707	NA	NA	NA	NA	NA	NA	NA	NA	NA	NA	NA	NA	NA	NA	NA	NA
R42707	NA	NA	NA	NA	NA	NA	NA	NA	NA	NA	NA	NA	NA	NA	NA	NA
AI300241	NA	NA	NA	NA	NA	NA	NA	-0.263034	NA	NA	NA	NA	NA	NA	NA	NA
AI300241	-0.0749621	NA	NA	NA	NA	NA	NA	NA	NA	NA	NA	NA	NA	NA	NA	NA
AI264291	-0.271027	-0.281182	-0.749038	-0.644625	0.0694851	NA	-0.124328	-0.815575	-0.382206	-0.621721	-0.167786	-0.562344	NA	NA	NA	NA
AI264291	-0.227261	-0.336305	-0.798931	-0.382206	-0.0703893	NA	NA	-0.834576	-0.499102	0.27486	-0.159199	-0.589748	NA	NA	NA	NA
AI198563	0.0179467	-0.751101	NA	-0.0885939	NA	NA	-0.0579774	NA	NA	NA	NA	NA	NA	NA	NA	NA
AI198563	-0.103442	-0.655598	NA	NA	NA	NA	-0.115477	-0.552541	NA	NA	NA	NA	NA	NA	NA	NA
AI183964	-0.27239	-0.367035	-0.242062	-0.132788	0.196223	-0.155679	-0.0457664	-0.426745	-0.0539123	-0.0453124	0.00190959	-0.00122107	NA	NA	-0.0931094	-1.12212
AI183964	-0.155355	-0.326894	-0.15083	-0.0748274	0.0909981	-0.28552	-0.0303965	-0.427626	-0.127865	0.407813	-0.0393324	-0.0582089	NA	NA	-0.0931094	-0.958533
AA699725	0.0446251	-0.265591	0.0664421	0.00776819	0.47357	0.101248	0.266887	-0.521282	0.0435577	0.619369	0.417651	0.148078	0.0255507	0.400588	0.376784	0.47763
AA699725	0.0317659	-0.240036	0.0212972	-0.018007	0.527975	0.156832	0.211579	-0.494125	0.099617	0.772858	0.318985	0.138682	0.182226	0.578217	0.427458	0.47575
AA705999	-0.348856	-0.942915	0.158977	0.0779674	0.220543	-0.336501	0.222222	-0.0950243	0.177516	0.499227	0.211875	0.165801	0.058103	0.151244	0.429772	0.514964
AA705999	-0.385407	-0.936864	0.269161	0.0379962	0.145616	-0.0370823	0.238685	-0.133899	0.0847678	0.355895	0.327549	0.147569	0.0932274	0.165851	0.358015	0.478792
N74662	0.0820547	-0.319352	0.131996	-0.0236163	0.666975	-0.0170735	0.348344	-0.505865	-0.195765	0.595414	0.356756	0.0174241	0.273335	-0.045324	0.0437214	-0.125339
N74662	0.111352	-0.285625	0.119644	-0.0361702	0.713131	-0.0366261	0.364773	-0.56118	-0.0610352	0.450049	0.414794	0.0544071	0.154723	-0.0789305	0.252692	0.0476664
N64669	-0.233285	-0.724123	0.111992	0.0195031	0.416809	0.0390252	0.31253	-0.358437	0.101864	0.357729	-0.0947007	-0.251773	-0.0610294	-0.886991	-0.043928	-0.703028
N64669	-0.244059	-0.594953	0.167375	0.0423923	0.319062	-0.15438	0.309629	-0.373053	0.084385	0.682909	-0.0796704	-0.185432	-0.169925	-0.875609	-0.116008	-0.577792
N56973	-0.299111	-0.776258	-0.464046	-0.483618	0.0198192	-0.0684847	-0.182576	-0.683616	0.0574425	0.741217	-0.233922	-0.0320104	0.641488	2.03007	0.800977	2.16554
N56973	-0.375682	-0.780392	-0.52005	-0.405256	0.0662156	-0.191678	-0.139471	-0.561585	-0.026185	0.676322	-0.24865	-0.0494273	0.68386	2.08219	0.743986	2.19138
N30367	0.00159361	-0.0337614	-0.290287	-0.183895	0.0532093	-0.0239789	-0.162228	-0.431361	0.192336	0.663549	0.206689	0.279198	0.564974	0.336616	0.498976	0.470515
N30367	-0.0226014	-0.145684	-0.149493	-0.228477	0.259555	-0.156638	-0.116436	-0.414038	0.208501	0.668696	0.258627	0.240606	0.617214	0.263645	0.444432	0.557195
N26840	0.000811643	-0.13243	-0.711324	-0.495695	0.193592	0.0686267	-0.353042	-0.786908	-0.378826	-0.512648	-0.101714	-0.278018	NA	NA	NA	-0.189034
N26840	0.027527	-0.125373	-0.502974	-0.464668	0.0901173	-0.0634254	-0.402965	-0.767766	-0.312253	-0.00770026	-0.0928788	-0.244262	0.275007	-0.286881	NA	-0.189034
N35393	-0.240918	-0.568544	0.293936	0.25417	0.273487	0.117357	0.241903	0.0648558	0.109039	0.690249	0.53997	0.182992	-0.185367	0.318768	0.0246912	0.387947
N35393	-0.29567	-0.520843	0.316705	0.224723	0.231688	0.220344	0.292181	-0.0105123	0.269982	0.559561	0.485266	0.172759	-0.124738	0.280316	0.0245223	0.407814
AI369154	-0.161772	-0.513807	-0.466466	-0.613532	0.18952	-0.275007	NA	-0.987927	0.3115	0.672366	-0.440066	-0.241008	NA	NA	NA	-0.0387845
AI369154	-0.0205474	-0.455231	-0.493313	-0.321928	0.155405	-0.180572	-0.0565835	-0.298658	0.396072	1.00155	NA	0.0046019	NA	NA	NA	-0.132057
AI199182	-0.00376192	-0.341037	NA	NA	NA	NA	NA	-0.0976108	NA	NA	NA	NA	NA	NA	NA	NA
AI199182	-0.374002	-0.522725	NA	NA	NA	NA	NA	-0.163499	NA	NA	NA	NA	NA	NA	NA	NA
AA878929	-0.347285	-0.395877	-0.463649	-0.705939	0.0619434	-0.556218	-0.207166	-0.963872	-0.0548967	0.139823	-0.220369	-0.214517	0.161013	0.222392	-0.0524059	0.219927
AA878929	-0.299238	-0.518802	-0.542877	-0.697475	0.108154	-0.526979	-0.290206	-0.989681	0.01935	NA	-0.168349	-0.272989	0.187221	0.205114	0.256187	0.385152
R06581	-0.360197	-0.457558	-0.394596	-0.312503	0.128981	-0.317482	-0.112226	-0.646565	0.0549756	0.283332	-0.0994347	-0.0377052	-0.00293529	-0.130397	-0.176301	-0.121368
R06581	-0.321774	-0.453612	-0.414182	-0.358537	0.0866054	-0.273159	-0.187843	-0.620333	0.0576411	0.341996	-0.0234114	0.0460511	0.254573	-0.0197633	-0.391908	-0.0599425
AA600209	0	0.0214372	NA	NA	NA	NA	NA	-0.464668	NA	NA	NA	NA	NA	NA	NA	NA
AA600209	-0.00519891	-0.0152265	NA	NA	NA	NA	NA	NA	NA	NA	NA	NA	NA	NA	NA	NA
N62278	NA	NA	NA	NA	NA	NA	NA	NA	NA	-0.0580473	NA	NA	NA	NA	NA	NA
N62278	NA	NA	NA	NA	NA	NA	NA	NA	NA	-0.754175	NA	NA	NA	NA	NA	NA
AA447499	-0.26934	-0.507264	-0.535567	-0.551967	NA	0.0554951	-0.366642	-0.716207	-0.122237	NA	-0.205059	-0.141065	1.09323	2.23669	0.734266	2.15784
AA447499	-0.200708	-0.410224	-0.548813	-0.396482	NA	0.0529258	-0.292782	-0.724366	-0.0279214	0.141869	-0.198001	-0.121991	1.12521	2.13357	0.555816	2.19001
N53382	-0.0985323	-0.133922	-0.370883	-0.401276	0.237723	0.0214691	-0.301381	-0.663437	-0.0256486	NA	-0.200218	-0.130416	NA	-0.0795203	-0.141869	-0.460375
N53382	-0.0631343	-0.207547	-0.330516	-0.382919	0.241988	-0.222392	-0.223833	-0.762345	0.105845	NA	-0.263034	-0.271546	NA	-0.337235	NA	-0.631585
AA954482	0.652396	0.222392	NA	NA	NA	NA	NA	NA	NA	NA	NA	NA	NA	NA	NA	NA
AA954482	0.688881	0.286502	NA	NA	NA	NA	NA	NA	NA	NA	NA	NA	NA	NA	NA	NA
N72562	0.0554951	0.100277	NA	NA	NA	NA	NA	NA	NA	0.238348	NA	NA	NA	NA	NA	NA
N72562	0.0294165	0.0583829	NA	NA	NA	NA	NA	NA	NA	-0.757023	NA	NA	NA	NA	NA	NA
R38312	-0.0976108	NA	NA	NA	NA	NA	NA	NA	NA	NA	NA	NA	NA	NA	NA	NA
R38312	-0.00801499	-0.318076	NA	NA	NA	NA	NA	NA	NA	NA	NA	NA	NA	NA	NA	NA
AI337360	-0.204218	-0.361011	-0.226444	-0.295824	-0.0453672	-0.257798	-0.152262	-0.599303	0.10077	-0.645916	0.0121589	-0.116371	0.357862	0.405149	0.517375	0.811238
AI337360	-0.170581	-0.500796	-0.331908	-0.274487	NA	-0.243222	-0.111918	-0.580493	0.235289	0.547434	0.0608511	-0.0655704	0.314556	0.327726	0.481916	0.762788
EMPTY	NA	NA	NA	NA	NA	NA	NA	NA	NA	NA	NA	NA	NA	NA	NA	NA
EMPTY	NA	NA	NA	NA	NA	NA	NA	NA	NA	NA	NA	NA	NA	NA	NA	NA
EMPTY	NA	NA	NA	NA	NA	NA	NA	NA	NA	NA	NA	NA	NA	NA	NA	NA
EMPTY	NA	NA	NA	NA	NA	NA	NA	NA	NA	NA	NA	NA	NA	NA	NA	NA
EMPTY	NA	NA	NA	NA	NA	NA	NA	NA	NA	NA	NA	NA	NA	NA	NA	NA
EMPTY	NA	NA	NA	NA	NA	NA	NA	NA	NA	NA	NA	NA	NA	NA	NA	NA
EMPTY	NA	NA	NA	NA	NA	NA	NA	NA	NA	NA	NA	NA	NA	NA	NA	NA
EMPTY	NA	NA	NA	NA	NA	NA	NA	NA	NA	NA	NA	NA	NA	NA	NA	NA
EMPTY	NA	NA	NA	NA	NA	NA	NA	NA	NA	-0.267036	NA	NA	NA	NA	NA	NA
EMPTY	NA	NA	NA	NA	NA	NA	NA	NA	NA	NA	NA	NA	NA	NA	NA	NA
EMPTY	NA	NA	NA	NA	NA	NA	NA	NA	NA	NA	NA	NA	NA	NA	NA	NA
EMPTY	NA	NA	NA	NA	NA	NA	NA	NA	NA	NA	NA	NA	NA	NA	NA	NA
EMPTY	NA	NA	NA	NA	NA	NA	NA	NA	NA	NA	NA	NA	NA	NA	NA	NA
EMPTY	NA	NA	NA	NA	NA	NA	NA	NA	NA	NA	NA	NA	NA	NA	NA	NA
EMPTY	NA	NA	NA	NA	NA	NA	NA	NA	NA	NA	NA	NA	NA	NA	NA	NA
EMPTY	NA	NA	NA	NA	NA	NA	NA	NA	NA	NA	NA	NA	NA	NA	NA	NA
EMPTY	NA	NA	NA	NA	NA	NA	NA	NA	NA	NA	NA	NA	NA	NA	NA	NA
EMPTY	NA	NA	NA	NA	NA	NA	NA	NA	NA	NA	NA	NA	NA	NA	NA	NA
EMPTY	NA	NA	NA	NA	NA	NA	NA	NA	NA	NA	NA	NA	NA	NA	NA	NA
EMPTY	NA	NA	NA	NA	NA	NA	NA	NA	NA	NA	NA	NA	NA	NA	NA	NA
EMPTY	NA	NA	NA	NA	NA	NA	NA	NA	NA	NA	NA	NA	NA	NA	NA	NA
EMPTY	NA	NA	NA	NA	NA	NA	NA	NA	NA	NA	NA	NA	NA	NA	NA	NA
EMPTY	NA	NA	NA	NA	NA	NA	NA	NA	NA	NA	NA	NA	NA	NA	NA	NA
EMPTY	NA	NA	NA	NA	NA	NA	NA	NA	NA	NA	NA	NA	NA	NA	NA	NA
5HG	-0.365893	-0.425817	NA	-0.965235	0.0496752	NA	-0.159887	-0.736966	-0.189034	0.412239	NA	NA	0.302563	NA	NA	-0.39689
5HG	-0.257454	-0.521564	NA	-0.730038	0.0470253	NA	-0.59346	-0.796277	-0.250894	0.461331	NA	NA	0.0612002	NA	NA	-0.226509
5HG	-0.206527	-0.633438	-0.701919	NA	-0.342525	NA	NA	NA	-0.223748	-0.693022	-0.194061	-0.0872224	NA	NA	0.0565835	-0.193246
5HG	-0.209118	NA	-0.713077	NA	0.00480099	-0.0976108	NA	NA	-0.0734354	0.210051	NA	-0.429393	NA	NA	NA	-0.111031
4DR	NA	NA	NA	NA	NA	NA	NA	NA	NA	NA	NA	NA	NA	NA	NA	NA
4DR	NA	NA	NA	NA	NA	NA	NA	NA	NA	NA	NA	NA	NA	NA	NA	NA
4DR	NA	NA	NA	NA	NA	NA	0.106572	NA	NA	NA	NA	NA	NA	NA	NA	NA
4DR	NA	NA	NA	NA	NA	NA	NA	NA	NA	NA	NA	NA	NA	NA	NA	NA
1Reserved	NA	NA	NA	NA	NA	NA	NA	NA	NA	-0.399012	NA	NA	NA	NA	NA	NA
1Reserved	NA	NA	NA	NA	NA	NA	NA	NA	NA	NA	NA	NA	NA	NA	NA	NA
1Reserved	NA	NA	NA	NA	NA	NA	NA	NA	NA	NA	NA	NA	NA	NA	NA	NA
1Reserved	NA	NA	NA	NA	NA	NA	NA	NA	NA	NA	NA	NA	NA	NA	NA	NA
1NC	NA	NA	NA	NA	NA	NA	NA	NA	NA	NA	NA	NA	NA	NA	NA	NA
1NC	NA	NA	NA	NA	NA	NA	NA	NA	NA	NA	NA	NA	NA	NA	NA	NA
1NC	NA	NA	NA	NA	NA	NA	NA	NA	NA	-0.363015	NA	NA	NA	NA	NA	NA
1NC	NA	NA	NA	NA	NA	NA	NA	NA	NA	NA	NA	NA	NA	NA	NA	NA
EMPTY	NA	NA	NA	NA	NA	NA	NA	NA	NA	NA	NA	NA	NA	NA	NA	NA
EMPTY	NA	NA	NA	NA	NA	NA	NA	NA	NA	NA	NA	NA	NA	NA	NA	NA
EMPTY	NA	NA	NA	NA	NA	NA	NA	NA	NA	NA	NA	NA	NA	NA	NA	NA
EMPTY	NA	NA	NA	NA	NA	NA	NA	NA	NA	NA	NA	NA	NA	NA	NA	NA
EMPTY	NA	NA	NA	NA	NA	NA	NA	NA	NA	NA	NA	NA	NA	NA	NA	NA
EMPTY	NA	NA	NA	NA	NA	NA	NA	NA	NA	NA	NA	NA	NA	NA	NA	NA
EMPTY	NA	NA	NA	NA	NA	NA	NA	NA	NA	-0.701919	NA	NA	NA	NA	NA	NA
EMPTY	NA	NA	NA	NA	NA	NA	NA	NA	NA	NA	NA	NA	NA	NA	NA	NA
EMPTY	NA	NA	NA	NA	NA	NA	NA	NA	NA	NA	NA	NA	NA	NA	NA	NA
EMPTY	NA	NA	NA	NA	NA	NA	NA	NA	NA	-0.374808	NA	NA	NA	NA	NA	NA
EMPTY	NA	NA	NA	NA	NA	NA	NA	NA	NA	NA	NA	NA	NA	NA	NA	NA
EMPTY	NA	NA	NA	NA	NA	NA	NA	NA	NA	NA	NA	NA	NA	NA	NA	NA
EMPTY	NA	NA	NA	NA	NA	NA	NA	NA	NA	NA	NA	NA	NA	NA	NA	NA
EMPTY	NA	NA	NA	NA	NA	NA	NA	NA	NA	NA	NA	NA	NA	NA	NA	NA
EMPTY	NA	NA	NA	NA	NA	NA	NA	NA	NA	NA	NA	NA	NA	NA	NA	NA
EMPTY	NA	NA	NA	NA	NA	NA	NA	NA	NA	NA	NA	NA	NA	NA	NA	NA
4NC	-0.339936	-0.230461	NA	-0.00958605	NA	NA	-0.216602	-0.520716	NA	NA	NA	NA	NA	NA	NA	NA
4NC	-0.383288	-0.683526	NA	NA	NA	-0.282934	-0.217273	-0.678072	-0.0976108	-0.616671	NA	NA	NA	NA	NA	NA
4NC	-0.509098	-0.560603	-0.351941	-0.159383	NA	NA	0.188987	-0.518467	NA	0.227526	-0.292027	-0.0519521	NA	NA	NA	-0.00478506
4NC	-0.584963	-0.535004	-0.256908	-0.184809	NA	NA	0.00746867	-0.681025	-0.0904153	-0.153452	-0.0885939	NA	NA	NA	NA	NA
1HG	-0.0899769	-0.380766	0.308309	0.31462	0.343473	0.0322554	0.239099	-0.225292	0.199497	0.52352	0.101182	-0.0362417	0.597851	0.637891	0.629075	0.578018
1HG	0.132833	-0.264119	0.234041	0.303022	0.27518	0.0999336	0.211256	-0.158547	0.206419	0.694402	0.125346	0.0617884	0.573879	0.581725	0.716703	0.612901
1HG	-0.186739	-0.479154	0.212329	0.244845	0.399131	-0.10562	0.210011	-0.236028	0.0582516	0.652747	-0.00209694	0.0547578	0.555725	0.562736	0.689213	0.623789
1HG	-0.229993	-0.502658	0.0676524	0.196072	0.256973	-0.0471265	0.218034	-0.228672	0.119676	0.47746	0.0162926	-0.04238	0.472845	0.56621	0.704969	0.681793
8HG	-0.288184	-0.514573	0.0462524	0.00336685	0.0496918	-0.187921	-0.337149	-0.438364	-0.177068	-0.02368	0.115877	-0.186751	0.0155502	0.132028	0.0330639	0.258327
8HG	-0.200498	-0.650917	0.162028	0.0403891	0.149179	-0.207184	-0.187216	-0.484162	-0.115803	0.15556	-0.00183083	-0.20061	0.0283899	0.156204	0.120581	0.184432
8HG	-0.240367	-0.514729	-0.0241645	0.0422034	0.0897214	-0.206734	-0.14867	-0.527084	0.0568714	0.310913	0.00178147	-0.15078	0.109744	0.186365	0.130012	0.288274
8HG	-0.226912	-0.499489	0.0660677	0.0552266	0.223996	-0.174903	-0.258342	-0.485634	-0.130509	NA	-0.0403734	-0.297643	0.06869	0.224935	-0.0100642	0.447481
2RC	NA	NA	NA	NA	NA	NA	0.430113	NA	NA	NA	NA	NA	NA	NA	NA	NA
2RC	NA	NA	NA	NA	NA	NA	0.539366	NA	NA	NA	NA	NA	NA	NA	NA	NA
2RC	NA	NA	NA	NA	NA	NA	NA	NA	NA	NA	NA	NA	NA	NA	NA	NA
2RC	NA	NA	NA	NA	NA	NA	NA	NA	NA	-0.385891	NA	NA	NA	NA	NA	NA
AA878899	-0.456768	-0.778344	-0.30493	-0.183508	-0.0756425	-0.214739	0.0269936	-0.395929	0.00683203	0.137504	-0.172013	-0.171284	0.550197	0.00647312	0.0140296	-0.0997816
AA878899	-0.417085	-0.794058	-0.24664	-0.0485517	-0.140725	NA	0.06185	-0.396782	-0.019389	0.479846	-0.123195	-0.0656215	0.532115	0.0218766	0.0646091	-0.113598
AA888182	-0.296188	-0.535499	-0.227181	0.00831031	0.134766	-0.12492	-0.189296	-0.331114	0.0478419	0.672892	-0.186755	0.118943	0.0180332	-0.432701	0.0420174	-0.41522
AA888182	-0.21517	-0.593282	-0.268712	0.0277362	0.214073	-0.225147	-0.0840643	-0.308592	-0.055658	0.694799	-0.201486	0.171514	0.0225074	-0.455621	0.021035	-0.406572
AA873351	-0.471001	-0.659939	-0.389007	-0.248274	-0.132574	-0.430279	-0.337885	-0.354995	0.0208046	0.744349	-0.406979	0.0568383	-0.220295	-0.132851	-0.539066	-0.140094
AA873351	-0.258633	-0.553114	-0.334404	-0.376072	-0.0197802	-0.381236	-0.274838	-0.446388	-0.0350425	0.579834	-0.334592	0.0660636	-0.225086	-0.097748	-0.471973	-0.177253
AA894927	NA	NA	NA	-0.456448	NA	NA	-0.140699	-0.447138	NA	NA	-0.230613	-0.0426443	-0.95109	-1.53771	-1.33628	-0.584963
AA894927	NA	NA	NA	-0.350671	NA	NA	-0.292329	NA	NA	NA	-0.415037	-0.306457	-0.850666	-1.67657	-1.12539	-0.8101
AA489653	NA	NA	NA	NA	NA	NA	NA	NA	NA	NA	NA	NA	NA	NA	NA	NA
AA489653	NA	NA	NA	NA	NA	NA	NA	NA	NA	NA	NA	NA	NA	NA	NA	NA
AA411202	-0.301927	-0.687199	-0.202249	-0.304115	-0.100351	-0.120016	-0.268648	-0.336113	-0.0962153	0.0928488	-0.125946	-0.2876	0.000859003	-0.336087	0.0559522	-0.244616
AA411202	-0.329902	-0.724325	-0.232966	NA	-0.12083	-0.245004	-0.29693	-0.402586	-0.216069	0.0142372	-0.138187	-0.248562	-0.0054925	-0.347723	0.0968209	-0.215031
AA598507	NA	NA	NA	NA	NA	NA	0.0857299	NA	NA	NA	NA	NA	NA	NA	NA	NA
AA598507	NA	NA	NA	NA	NA	NA	0.103446	NA	NA	NA	NA	NA	NA	NA	NA	NA
AA663439	-0.555865	-0.912294	-0.0664723	-0.0266418	0.0720951	-0.145339	0.0570234	-0.229436	-0.346297	-0.0325905	-0.0353145	0.2017	0.107593	-0.266192	0.230342	-0.351023
AA663439	-0.559114	-0.883186	-0.0753164	-0.0120504	0.0297473	-0.0793079	0.0621601	-0.237414	-0.0285692	0.611957	0.0658264	0.244597	0.104382	-0.253692	0.20957	-0.355695
AA703169	NA	NA	NA	NA	NA	NA	-0.221781	NA	NA	NA	NA	NA	NA	NA	NA	NA
AA703169	NA	NA	NA	NA	NA	NA	NA	NA	NA	NA	NA	NA	NA	NA	NA	NA
N47111	NA	NA	NA	NA	NA	NA	NA	NA	NA	NA	NA	NA	NA	NA	NA	NA
N47111	NA	NA	NA	NA	NA	NA	NA	NA	NA	NA	NA	NA	NA	NA	NA	NA
AA142971	NA	NA	NA	NA	NA	NA	NA	NA	NA	NA	NA	NA	NA	NA	NA	NA
AA142971	NA	NA	NA	NA	NA	NA	NA	NA	NA	NA	NA	NA	NA	NA	NA	NA
AA128826	NA	NA	NA	NA	NA	NA	NA	NA	NA	NA	NA	NA	NA	NA	-0.167786	-0.0840643
AA128826	NA	NA	NA	NA	NA	NA	NA	NA	NA	NA	NA	NA	NA	NA	-0.115477	-0.124328
R63065	-0.319501	-0.197446	-0.124148	-0.288569	NA	NA	-0.0522601	-0.463787	0.0645004	0.390584	-0.26431	-0.201582	1.28035	1.11741	1.35464	1.13288
R63065	-0.236877	-0.600904	-0.184783	-0.332661	NA	NA	0.0248747	-0.571937	0.0843692	0.392436	-0.244476	-0.426052	1.25507	1.07135	1.42847	1.22504
AA463458	-0.153913	-0.944858	0.126316	0.138183	NA	NA	-0.00913101	-0.291198	-0.168953	NA	0.182051	-0.0941905	0.567403	0.0478007	0.650365	0.0957241
AA463458	-0.402354	-0.997989	0.0260807	0.0491245	NA	NA	-0.0108317	-0.357696	-0.142019	0.188139	0.255208	0	0.52532	-0.00626443	0.571409	0.050228
H08732	0.0796783	NA	0.24952	0.1858	NA	NA	0.433983	0.0023535	NA	NA	0.180059	-0.0533872	0.96676	0.890323	0.932266	0.665027
H08732	NA	NA	0.33044	0.0719698	NA	NA	0.362929	-0.0904691	NA	NA	0.174251	-0.055648	0.920096	0.782714	0.939385	0.756234
N92319	NA	NA	NA	NA	NA	NA	-0.265492	NA	NA	-0.635545	NA	NA	NA	NA	-0.133125	NA
N92319	NA	NA	NA	NA	NA	NA	NA	NA	NA	NA	NA	NA	NA	NA	-0.00480099	NA
H70473	NA	NA	NA	NA	NA	NA	NA	NA	NA	NA	NA	NA	NA	NA	NA	NA
H70473	NA	NA	NA	NA	NA	NA	NA	NA	NA	NA	NA	NA	NA	NA	NA	NA
H02243	NA	NA	NA	NA	NA	NA	0.00299625	NA	NA	NA	NA	NA	NA	NA	NA	NA
H02243	NA	NA	NA	NA	NA	NA	0	NA	NA	NA	NA	NA	NA	NA	NA	NA
N95121	-0.0795203	-0.499102	-0.666465	-0.847997	NA	NA	-0.378512	-0.923466	NA	NA	-0.397842	-0.388099	-0.0859001	-0.866015	-0.641546	-0.799087
N95121	NA	-0.690379	-0.523952	-0.757023	NA	NA	-0.526293	-0.704872	NA	NA	-0.290128	-0.439854	-0.0317089	-0.798366	-0.594549	-0.481988
T71887	NA	NA	0.14439	-0.458228	NA	NA	-0.0199981	-0.485427	NA	-0.476567	NA	-0.148323	NA	NA	NA	NA
T71887	NA	NA	0.286621	-0.347474	NA	NA	0.00740985	-0.526069	NA	NA	NA	-0.362067	NA	NA	NA	NA
AA838691	-0.506624	-0.820476	NA	NA	NA	NA	-0.391038	NA	-0.323539	-0.0255351	0.31478	-0.263034	0.123735	-0.870717	0.327653	-0.68941
AA838691	-0.321928	-0.963744	NA	NA	-0.0703893	NA	-0.131032	NA	-0.0238467	NA	0.336927	-0.330046	0.195551	-0.85726	0.404705	-0.684768
AA708298	-0.199329	-0.814163	0.0451566	-0.145323	0.223244	-0.172425	0.00344045	0.00486576	-0.12347	0.793535	-0.161369	0.180873	0.179257	0.262112	0.351909	0.144608
AA708298	-0.309773	-0.631325	-0.0730039	-0.0958056	0.113009	-0.198001	-0.0372329	-0.331676	-0.00385004	0.726401	-0.144827	0.105573	0.171212	0.299018	0.327013	0.194108
N55461	-0.493263	-0.608421	NA	NA	NA	NA	NA	NA	NA	NA	NA	NA	NA	NA	-0.321928	NA
N55461	-0.471306	-0.641313	NA	NA	NA	NA	NA	NA	NA	NA	NA	NA	NA	NA	-0.267036	-0.0238467
AA922326	-0.339692	-0.745539	-0.582804	NA	-0.261648	NA	-0.568843	NA	NA	NA	-0.615706	-0.43842	0.186002	-0.283022	0.134235	-0.359222
AA922326	-0.296326	-0.558978	-0.639375	NA	-0.187933	NA	-0.286881	NA	NA	NA	-0.660667	-0.418283	0.14504	-0.242291	0.137956	-0.342001
AA280647	-0.147479	NA	NA	-0.376691	NA	NA	-0.171411	-0.429393	NA	-0.464668	NA	NA	NA	NA	NA	NA
AA280647	-0.183982	NA	NA	-0.385891	NA	NA	-0.16319	-0.719549	NA	NA	NA	NA	NA	NA	NA	NA
AA464856	-0.395796	-0.807355	0.0494283	0.149016	0.0610756	NA	0.314722	-0.0793734	0.306978	0.521827	0.199719	0.170654	0.703421	0.17724	0.791911	0.356186
AA464856	-0.430723	-0.595397	-0.028504	0.137764	0.042898	NA	0.281788	-0.0398927	0.17618	0.76275	0.248317	0.0855416	0.738617	0.164652	0.769897	0.294537
T62547	-0.328139	-0.733213	-0.50915	-0.549869	-0.0402639	NA	-0.431188	-0.899553	-0.212751	0.12087	-0.607412	-0.673178	-2.38867	-3.41097	-2.48714	-2.09424
T62547	-0.329365	-0.758117	-0.568076	-0.504562	-0.154478	NA	-0.470933	-0.8843	-0.243957	-0.00976447	-0.547766	-0.672569	-2.38882	-3.39188	-2.22651	-2.70635
AA478043	NA	NA	-0.440066	-0.571776	NA	NA	-0.238761	-0.814506	NA	NA	NA	-0.280607	NA	0.363638	-0.0191088	0.0565835
AA478043	-0.184809	NA	-0.356144	-0.43407	NA	NA	-0.269811	-0.800087	NA	-0.583726	NA	NA	NA	0.393233	NA	0.172061
AA478553	NA	NA	NA	NA	NA	NA	NA	NA	NA	-0.892828	NA	NA	NA	NA	NA	NA
AA478553	NA	NA	NA	NA	NA	NA	-0.0976108	NA	NA	NA	NA	NA	NA	NA	NA	NA
R20666	NA	NA	NA	NA	NA	NA	NA	NA	NA	NA	NA	NA	NA	NA	NA	NA
R20666	NA	NA	NA	NA	0.0079052	NA	NA	NA	NA	NA	NA	NA	NA	NA	NA	NA
AA029419	NA	-0.0426443	-0.126612	NA	NA	NA	0.0200842	-0.275509	NA	0.116712	0.354449	0.51069	0.228383	-0.340577	0.0888443	-0.316234
AA029419	NA	NA	-0.030162	0.28866	NA	NA	0.00546131	-0.354473	NA	0.136517	0.168754	0.385731	0.20738	-0.291617	0.14304	-0.208529
R73525	NA	NA	NA	NA	NA	NA	0.0143553	NA	NA	NA	NA	NA	NA	NA	NA	NA
R73525	NA	NA	NA	NA	NA	NA	-0.122772	NA	NA	NA	NA	NA	NA	NA	-0.411426	NA
R79948	-0.263723	-0.246915	NA	NA	NA	NA	NA	NA	NA	NA	NA	NA	NA	NA	NA	NA
R79948	-0.1939	-0.246915	NA	NA	NA	NA	NA	NA	NA	NA	NA	NA	NA	NA	NA	NA
N95761	NA	NA	-0.385891	NA	NA	NA	-0.580225	NA	NA	NA	-0.446186	-0.0351894	NA	0.268817	-0.111031	-0.121912
N95761	NA	NA	-0.584963	NA	NA	NA	-0.189034	NA	NA	-0.0786469	-0.223351	NA	NA	0.289765	-0.281596	-0.13179
H96241	NA	NA	-0.479719	NA	NA	NA	-0.8101	NA	NA	NA	-0.854066	NA	0.0222987	0.181203	-0.180879	-0.170208
H96241	NA	NA	-0.693508	NA	NA	NA	-0.522725	NA	NA	NA	-0.736966	-0.0379679	0.133911	0.133963	0.070504	-0.26039
H72875	-0.39689	-1.71049	-1.04493	-0.675063	NA	NA	-0.902862	-1.50677	NA	NA	-1.16616	-1.19286	-0.823815	-2.20796	-0.693792	-2.18996
H72875	-0.163499	-1.58496	-0.94592	-0.731183	-0.0749621	NA	-1.02122	-1.21826	NA	NA	-1.18984	-0.94669	-0.833047	-2.17498	-0.735601	-2.15141
PM0006A	-0.417955	-0.172061	-0.682385	-0.964595	NA	NA	-0.294678	-1.22175	NA	NA	NA	-0.773996	0.321928	0.319212	NA	-0.00480099
PM0006A	-0.541032	-0.0473057	-0.495695	-0.916506	NA	NA	-0.252168	-1.14863	NA	NA	-0.302563	-0.242857	0.378512	0.391509	NA	NA
AA486289	-0.434403	-0.659484	-0.399691	-0.408244	-0.158449	-0.0976108	-0.293531	-0.593498	-0.391483	0.682336	-0.1823	-0.16304	0.86791	0.0817589	0.956841	0.188509
AA486289	-0.497588	-0.826266	-0.423507	-0.433669	NA	-0.146592	-0.235356	-0.559049	-0.275265	0.42226	-0.182371	-0.156406	0.831758	0.111872	0.847252	0.166024
AA219061	-0.386429	-0.863698	-0.214125	-0.249545	NA	-0.0238467	-0.170123	-0.652976	0.126171	0.52245	-0.167504	-0.0870094	0.0166147	0.141641	-0.19415	0.162821
AA219061	-0.365794	-0.739191	-0.279756	-0.294731	NA	-0.318489	-0.167664	-0.635435	-0.0395602	0.0104317	-0.11457	-0.148274	-0.0134742	0.109689	-0.211784	0.181286
AA489219	-0.46063	-0.632052	-0.0776973	0.218091	NA	-0.0449319	0.233461	0.135505	0.315606	0.892144	0.575315	0.838342	-0.109973	-0.756304	-0.00660273	-0.786106
AA489219	-0.450404	-0.62608	0.0214705	0.162891	0.065095	-0.009602	0.231489	0.00286533	0.28839	NA	0.626879	0.857367	-0.147178	-0.8064	-0.037153	-0.647238
T64482	-0.306208	-0.683265	-0.0344595	-0.186612	NA	NA	0.0471549	-0.663315	0.107528	NA	-0.0205474	-0.131192	0.288245	-0.573185	-0.0869833	-0.613532
T64482	-0.27323	-0.57918	-0.100588	-0.263446	NA	NA	0.0527472	-0.626003	-0.163499	0.119546	0.0616022	-0.0681496	0.295183	-0.555816	-0.278535	-0.941106
AA446876	0.0356008	-0.268567	0.147905	0.310821	0.293393	0.189034	0.164982	0.104301	0.316259	0.972929	0.299756	0.323728	0.510705	0.0542055	0.472753	-0.027914
AA446876	-0.0438673	-0.244551	0.164757	0.335218	NA	0.387841	0.193216	0.138772	0.196313	NA	0.230669	0.464829	0.516028	0.0902531	0.472882	0.0324869
AA047666	-0.553704	-0.860597	-0.163093	-0.175318	NA	NA	-0.101036	-0.677545	-0.294743	NA	-0.0559087	-0.304199	0.110512	-0.178158	-0.0679299	-0.0579582
AA047666	-0.468218	-0.819812	-0.0286127	-0.19605	NA	NA	-0.167133	-0.656377	-0.0749621	0.172119	0.0262581	-0.408901	0.0917162	-0.21913	0.0539949	-0.13493
AA485646	-0.451761	-0.854445	-0.655831	-0.866417	-0.359639	-0.400538	-0.651978	-0.933573	-0.550265	0.163676	-0.869675	-0.682696	0.884408	0.572167	0.72	0.0421798
AA485646	-0.565897	-0.844155	-0.816627	-0.953206	NA	-0.341037	-0.720303	-0.650765	-0.823122	0.135333	-0.746426	-0.830215	0.824673	0.629276	0.610151	-0.0685439
AA486850	-0.253057	-0.520286	-0.407516	-0.468192	-0.168484	-0.440221	-0.375686	-0.661482	-0.193991	0.454814	-0.524036	-0.259999	0.224266	-0.509191	0.292381	-0.686396
AA486850	-0.288572	-0.538324	-0.431286	-0.502182	-0.165453	-0.428712	-0.332776	-0.631952	-0.312145	0.410033	-0.508591	-0.259453	0.24245	-0.471371	0.107186	-0.66576
AA448396	-0.410422	-0.738589	-0.230801	-0.275881	-0.0561968	-0.351985	-0.163551	-0.664052	0.0103198	0.552133	-0.229184	0.00841999	0.279651	-0.189258	0.450583	-0.287585
AA448396	-0.336437	-0.881889	-0.179033	-0.335426	-0.0303862	-0.273272	-0.150333	-0.614059	-0.0670863	0.657425	-0.180572	0.0447935	0.215399	-0.225238	0.426935	-0.110076
T62086	-0.192066	-0.479459	-0.43828	NA	-0.00347219	NA	-0.201	NA	NA	NA	-0.287022	-0.22532	0.516015	0.924742	0.336753	0.455144
T62086	-0.192848	-0.461695	-0.485873	NA	0.115198	NA	-0.279224	NA	NA	NA	-0.314496	-0.265712	0.549258	0.913412	0.41691	0.388182
AA487442	-0.246923	-0.68909	0.326454	0.134542	0.148126	-0.164289	0.220727	-0.207233	0.0712587	0.657699	0.294269	0.288318	1.00569	0.712458	1.26939	0.649428
AA487442	-0.199386	-0.631416	0.263503	0.104157	0.142435	-0.14703	0.271023	-0.31305	0.136406	0.747043	0.165777	0.405955	0.963634	0.737103	1.12393	0.584963
R56638	NA	NA	NA	NA	NA	NA	NA	NA	NA	NA	NA	NA	NA	NA	NA	NA
R56638	NA	NA	NA	NA	NA	NA	NA	NA	NA	NA	NA	NA	NA	NA	NA	NA
AA485362	-0.188445	-0.44179	-0.258509	-0.372288	NA	NA	-0.161353	-0.890122	-0.0976108	0.127379	-0.186845	-0.289147	NA	NA	NA	NA
AA485362	-0.238444	-0.420082	-0.314986	-0.344143	NA	NA	-0.186234	-0.800556	NA	NA	-0.124071	-0.398681	NA	NA	NA	NA
AA043996	NA	NA	NA	NA	NA	NA	NA	NA	NA	NA	NA	NA	NA	NA	NA	NA
AA043996	NA	NA	NA	NA	NA	NA	NA	NA	NA	NA	NA	NA	NA	NA	NA	NA
AA071330	-0.265875	-0.638445	0.0715291	0.0594874	-0.0827249	NA	-0.00898878	-0.18502	-0.163912	0.261852	0.191426	-0.08092	0.376389	-0.400148	0.0362202	-0.207578
AA071330	-0.422264	-0.611791	0.0904375	-0.0224549	NA	NA	0.0237016	-0.203322	-0.144222	0.137504	0.235757	0.102107	0.364683	-0.415675	0.0292307	-0.114791
H09730	-0.383819	-0.492671	-0.128146	-0.246273	0.00792692	NA	-0.105305	-0.570316	0.0389284	0.145176	0.135215	0.187322	-0.196483	0.00753367	-0.305936	0.0453715
H09730	-0.286858	-0.448631	-0.115881	-0.0188943	-0.0515303	NA	-0.119239	-0.622765	-0.0781434	0.295045	0.155754	0.135748	-0.114171	0.0302542	-0.509119	-0.0108299
AA436410	-0.348356	-0.75269	0.100325	0.0954196	0.103587	NA	0.266358	-0.132422	0.220753	0.298724	0.459511	0.179304	0.684858	0.438546	0.853012	0.605218
AA436410	-0.340648	-0.733061	0.153528	0.0785334	0.00763332	NA	0.262884	-0.142019	0.0504294	-0.620096	0.347156	0.186031	0.68068	0.441987	0.806246	0.660273
N32768	-0.111031	NA	NA	NA	NA	NA	NA	NA	NA	NA	NA	NA	NA	NA	NA	NA
N32768	NA	NA	NA	NA	NA	NA	NA	NA	NA	NA	NA	NA	NA	NA	NA	NA
R72079	NA	NA	NA	NA	NA	NA	NA	NA	NA	NA	NA	NA	NA	NA	NA	NA
R72079	NA	NA	NA	NA	NA	NA	NA	NA	NA	NA	NA	NA	NA	NA	NA	NA
N59270	-0.387023	-0.62605	-0.0795203	NA	NA	NA	-0.201634	NA	NA	NA	-0.895303	-0.0612002	NA	NA	NA	NA
N59270	-0.310679	-0.641546	-0.222392	NA	NA	NA	NA	NA	NA	NA	-0.897886	-0.201634	NA	NA	NA	NA
AA102526	NA	NA	NA	NA	NA	NA	NA	NA	NA	NA	NA	NA	NA	NA	NA	NA
AA102526	NA	NA	NA	NA	NA	NA	NA	NA	NA	NA	NA	NA	NA	NA	NA	NA
AA011415	NA	NA	NA	NA	NA	NA	NA	NA	NA	NA	NA	NA	NA	NA	NA	NA
AA011415	NA	NA	NA	NA	NA	NA	NA	NA	NA	NA	NA	NA	NA	NA	NA	NA
AA677706	NA	NA	NA	NA	NA	NA	NA	NA	NA	NA	NA	NA	NA	NA	NA	NA
AA677706	NA	NA	NA	NA	NA	NA	NA	NA	NA	NA	NA	NA	NA	NA	NA	NA
AA733203	-0.27196	-0.661985	-0.13852	-0.246774	NA	NA	-0.176409	-0.746987	-0.109589	0.828687	-0.197982	-0.210449	NA	0.367371	NA	0.628997
AA733203	-0.239426	-0.704767	-0.174759	-0.371631	NA	NA	-0.220788	-0.764597	-0.133992	0.781415	-0.241008	-0.22995	NA	0.40184	NA	0.607369
AA706022	NA	NA	NA	NA	NA	NA	NA	NA	NA	-0.612977	NA	NA	NA	NA	NA	NA
AA706022	NA	NA	NA	NA	NA	NA	NA	NA	NA	NA	NA	NA	NA	NA	NA	NA
AA772066	-0.361555	-0.65871	-0.13852	-0.174748	0.141326	-0.467021	0.163161	-0.493165	0.159871	-0.670026	0.0923706	0.00367379	0.633218	-0.00272207	0.55688	0.103652
AA772066	-0.210462	-0.550381	-0.128363	-0.216374	0.297452	-0.425926	0.189428	-0.4474	0.387128	0.353285	0.146418	0.026057	0.63061	-0.045443	0.542318	0.0100437
N62514	-0.0317576	-0.277224	-0.397335	-0.484954	0.280711	-0.324002	-0.312162	-0.878605	0.0105403	0.421799	-0.445938	-0.244569	0.0724406	0.378355	-0.484635	-0.135178
N62514	-0.342129	-0.27486	-0.490096	-0.450848	0.16932	-0.451211	-0.323894	-0.929975	-0.15675	-0.227024	-0.416888	-0.352117	0.0546808	0.399366	-0.408963	-0.0409603
N59790	-0.0647057	-0.442128	0.057456	0.0401068	NA	NA	0.17542	-0.260612	0.0840643	0.195805	0.25725	0.241376	0.447459	1.14611	0.122645	1.17553
N59790	-0.104405	-0.459958	0.179507	0.0625725	NA	NA	0.13274	-0.533761	NA	0.373153	0.360721	0.396628	0.531955	1.1032	-0.171953	1.1481
T71272	NA	NA	NA	NA	NA	NA	0.231552	NA	NA	-0.159199	NA	0.526069	NA	NA	NA	NA
T71272	NA	NA	NA	NA	NA	NA	0.219642	-0.163499	NA	NA	NA	NA	NA	NA	NA	NA
AA857343	NA	NA	0.0740006	-0.228269	NA	NA	-0.052388	-0.282934	NA	NA	-0.0285692	-0.326178	NA	0.488858	NA	NA
AA857343	NA	NA	-0.0120728	-0.354608	NA	NA	-0.0149892	-0.106572	NA	NA	-0.186413	-0.479322	NA	0.572081	NA	NA
AA916325	NA	NA	NA	NA	NA	NA	NA	NA	NA	NA	0.415037	NA	NA	1.27699	NA	1.19325
AA916325	NA	NA	NA	NA	NA	NA	NA	NA	NA	NA	NA	NA	NA	1.22856	NA	0.167786
R54492	NA	NA	NA	NA	NA	NA	-0.0161197	NA	NA	NA	NA	NA	NA	NA	-0.0519521	NA
R54492	NA	NA	NA	NA	NA	NA	NA	NA	NA	NA	0.352382	NA	NA	NA	NA	NA
T53220	NA	-0.106572	NA	NA	NA	NA	NA	NA	NA	NA	NA	NA	NA	NA	NA	NA
T53220	NA	-0.267036	NA	NA	NA	NA	NA	NA	NA	NA	NA	NA	NA	NA	NA	NA
AA663986	-0.267721	-0.485906	0.334522	0.285438	0.237775	-0.0532167	0.320722	0.0653977	0.147435	0.776544	0.403529	0.391869	-0.646446	-0.366218	-0.411771	-0.237312
AA663986	-0.299638	-0.610878	0.280632	0.197863	0.255822	0.0183008	0.35962	-0.0448915	0.15124	0.757804	0.399747	0.474867	-0.632534	-0.35468	-0.475052	-0.228022
N48355	-0.0396302	-0.2837	-0.395004	-0.111031	0.0355362	-0.223351	-0.477838	-0.00958605	-0.26764	0.64456	-0.584317	-0.401629	-0.127148	0.353037	-0.219617	-0.101657
N48355	-0.0376581	-0.230907	-0.477243	NA	0.036494	-0.387536	-0.385551	NA	-0.201747	0.485689	-0.558151	-0.427454	-0.0625775	0.378626	-0.255441	-0.133203
H07899	NA	NA	NA	-0.559084	NA	NA	-0.753892	-0.562344	NA	-0.146221	-0.485427	-0.550625	NA	NA	NA	NA
H07899	NA	NA	NA	-0.607232	NA	NA	-0.552541	-0.222392	NA	NA	-0.209973	-0.568879	NA	NA	NA	NA
AA055504	-0.527831	-0.862913	-0.532099	-0.580757	NA	NA	-0.304611	-0.837097	-0.208587	NA	-0.407566	-0.431626	-0.221073	-0.472769	-0.283383	-0.417495
AA055504	-0.492549	-1.00511	-0.63541	-0.564751	NA	NA	-0.367276	-0.807267	-0.124041	NA	-0.329163	-0.386029	-0.154163	-0.448874	-0.347923	-0.419066
H44953	NA	NA	NA	-0.278976	NA	NA	-0.321928	-0.298658	NA	NA	NA	NA	NA	NA	NA	NA
H44953	0.108934	NA	NA	-0.259021	NA	NA	-0.381231	-0.197446	NA	NA	NA	NA	NA	NA	NA	NA
H18070	-0.321928	-0.513816	-0.280777	-0.394473	-0.0853915	NA	-0.319476	-0.827	0.0635357	-0.647761	-0.347204	-0.468553	0.182807	0.39626	0.0652259	0.00476295
H18070	-0.052901	-0.245253	-0.421768	-0.366572	0.122709	-0.00958605	-0.284193	-0.813231	-0.0937821	-0.0340889	NA	-0.473704	0.233278	0.391287	0.0425315	0.0507556
AA775091	2.70377	2.74596	2.82271	3.13628	2.84323	3.09203	2.60178	2.89994	4.1365	4.09707	0.771181	3.61822	3.28562	2.88418	3.44733	2.84891
AA775091	2.79912	2.71216	2.88392	3.14995	2.94483	3.11369	2.62653	2.8951	4.0064	4.16548	3.76532	3.61267	3.29212	2.89868	3.35798	2.85191
AA853954	-0.129909	-0.214125	NA	NA	NA	NA	-0.0565835	NA	NA	-0.489543	NA	NA	NA	NA	NA	NA
AA853954	-0.0773748	-0.159199	NA	NA	NA	NA	-0.226509	NA	NA	NA	NA	NA	NA	NA	NA	NA
AA877845	0.152003	0.105097	0.150511	0.519602	NA	0.8101	0.0534273	0.548809	0.164834	1.35076	1.04548	1.62388	0.916933	0.192008	1.12369	0.230505
AA877845	0.065376	-0.047389	0.184143	0.536053	0.349191	0.782941	0.0404438	0.649792	0.497145	-0.100763	1.11055	1.64538	0.947259	0.235925	0.928534	0.194869
AA843718	-0.388885	-1.00806	0.429357	0.157138	NA	NA	0.28724	-0.0162712	NA	NA	0.407925	0.153056	0.350211	0.592839	0.735659	0.921943
AA843718	-0.467305	-0.836188	0.406111	0.0395284	NA	NA	0.342272	-0.00885998	NA	NA	0.439119	0.149564	0.340405	0.600006	0.703916	1.04615
AA810225	-0.360737	-0.474877	-0.20912	-0.417196	-0.0262581	-0.389567	-0.105972	-0.0840643	-0.0306968	NA	-0.155278	-0.224106	NA	NA	0.114643	0
AA810225	-0.2893	-0.407206	-0.191879	-0.282934	0.102447	-0.201634	-0.278675	NA	-0.0253853	NA	-0.0977368	-0.218934	NA	NA	0.124109	0.0187366
AA098896	-0.00653955	-0.179139	0.415724	0.259805	0.515174	0.160465	0.540296	0.189478	0.393145	0.913688	0.572741	0.696833	0.659358	0.749934	0.921367	1.13988
AA098896	-0.0722054	-0.152717	0.480521	0.280933	0.471816	0.163857	0.497585	0.201935	0.0596035	1.12585	0.669676	0.621737	0.682403	0.774089	0.967603	1.20074
AA045529	0.0858472	-0.394578	-0.163523	-0.248411	0.292626	-0.0952227	-0.267515	-0.665398	-0.230006	0.0878546	-0.298675	-0.213065	0.627273	0.231569	0.759151	0.0597796
AA045529	0.178545	-0.384426	-0.241008	-0.31116	0.188164	0.117669	-0.25521	-0.786332	-0.234706	0.653098	-0.227378	-0.252015	0.57834	0.230213	0.810206	0.0754748
AA705069	-0.348179	-0.942879	-0.952171	-0.411426	NA	NA	-0.76033	NA	NA	NA	-0.883029	-0.745495	-0.429393	-0.823749	-0.820001	-1.40198
AA705069	-0.602266	-0.853656	-0.890708	-0.271027	NA	NA	-0.869213	NA	NA	NA	-0.720435	-0.78804	-0.371094	-0.928528	-0.914678	-1.52417
AA088420	NA	NA	NA	NA	NA	NA	NA	NA	NA	NA	NA	NA	NA	NA	NA	NA
AA088420	NA	NA	NA	NA	NA	NA	NA	NA	NA	NA	NA	NA	NA	NA	NA	NA
N69672	NA	NA	NA	NA	NA	NA	0.110035	-0.0795203	NA	-0.530821	NA	NA	NA	NA	NA	NA
N69672	-0.180572	NA	NA	NA	NA	NA	0.0293689	-0.238787	NA	-0.713696	NA	NA	NA	NA	NA	NA
R59579	-0.195446	-0.53574	0.0361446	-0.16809	NA	NA	-0.0248319	-0.496938	NA	0.167394	0.0375356	0.118497	NA	0.788723	0.0318705	0.777608
R59579	-0.324272	-0.486038	0.0389941	-0.0834493	NA	NA	-0.0432601	-0.482119	-0.023459	NA	-0.0297912	-0.0746388	NA	0.672048	0.184517	1.05181
AA454743	-0.544738	-0.429684	-0.393086	-0.270164	NA	NA	-0.289814	-0.746776	NA	NA	-0.0845158	-0.246342	NA	NA	NA	NA
AA454743	-0.4324	-0.612977	-0.431131	-0.672758	NA	NA	-0.170327	-0.724282	NA	NA	-0.108653	-0.282015	NA	NA	NA	NA
H93328	NA	NA	NA	-0.154886	NA	NA	-0.0397618	-0.341037	NA	NA	NA	NA	NA	NA	NA	NA
H93328	NA	NA	NA	-0.197446	NA	NA	0.0117198	NA	NA	0.157952	NA	NA	NA	NA	NA	NA
AA457118	-0.353764	-0.670965	0.259135	0.112938	NA	NA	0.123232	-0.289893	0.0143553	NA	0.244473	0.123208	-0.182744	0.21291	0.153946	0.518009
AA457118	-0.228028	-0.779978	0.193694	0.0606216	NA	NA	0.186144	-0.26748	NA	-0.306002	0.196504	0.214044	-0.185379	0.278552	0.0150911	0.426915
W73892	-0.280777	-0.53046	-0.356768	-0.417311	0.0472523	-0.593896	-0.287293	-0.943509	-0.124882	0.448871	-0.240765	-0.535937	0.413999	0.125815	0.378512	0.400013
W73892	-0.31893	-0.597112	-0.388808	-0.483008	-0.0134675	-0.598365	-0.340624	-0.76335	-0.196496	-0.0765416	-0.392071	-0.614686	0.368915	0.122857	0.337645	0.45813
R92806	-0.229124	-0.483694	-0.444561	-0.51849	-0.0769426	-0.330697	-0.553201	-0.75538	-0.0963582	-0.0880758	-0.649193	-0.461373	0.440787	0.0558821	0.586876	-0.185387
R92806	-0.257553	-0.436755	-0.390346	-0.481439	-0.0594211	-0.338613	-0.598629	-0.75179	-0.262398	0.260068	-0.534519	-0.511483	0.436434	0.082957	0.377742	-0.135672
R43015	-0.116081	-0.448875	0.0867589	-0.19324	0.157656	NA	-0.126642	-0.607683	-0.147719	NA	-0.0706298	-0.0674925	-0.171278	0.109398	0.14009	0.110923
R43015	-0.070749	-0.473423	0.0392552	-0.173347	0.165454	NA	-0.190956	-0.592955	NA	NA	-0.042904	-0.215389	-0.132514	0.126504	0.0830159	0.191741
R40897	NA	NA	NA	NA	NA	NA	NA	NA	NA	NA	NA	NA	NA	NA	NA	NA
R40897	NA	NA	NA	NA	NA	NA	NA	NA	NA	NA	NA	NA	NA	NA	NA	NA
T71551	-0.177089	-0.424197	-0.39144	-0.214125	-0.192061	NA	-0.504764	NA	NA	NA	-0.611314	-0.71473	0.822357	0.905988	0.891912	0.642152
T71551	-0.131245	-0.478891	-0.364071	-0.0658021	-0.158877	NA	-0.556686	NA	NA	NA	-0.59796	-0.659209	0.79657	0.847162	0.634483	0.48944
R87763	NA	NA	NA	NA	NA	NA	NA	NA	NA	NA	NA	NA	NA	NA	NA	NA
R87763	NA	NA	NA	NA	NA	NA	NA	NA	NA	NA	NA	NA	NA	NA	NA	NA
AA481759	-0.351021	NA	-0.599075	-0.740542	NA	NA	-0.684133	-1.19649	NA	NA	-0.619804	-0.616671	0.21453	0.82588	-0.137504	0.156726
AA481759	-0.267622	NA	-0.701809	-0.848825	NA	NA	-0.642493	-1.23383	NA	NA	-0.591115	-0.557057	0.371094	0.699909	NA	NA
AA064638	NA	NA	NA	NA	NA	NA	NA	NA	NA	NA	NA	NA	NA	NA	NA	NA
AA064638	NA	NA	NA	NA	NA	NA	NA	NA	NA	NA	NA	NA	NA	NA	NA	NA
R53541	NA	NA	NA	NA	NA	NA	NA	NA	NA	NA	NA	NA	NA	NA	-0.425817	NA
R53541	NA	NA	NA	NA	NA	NA	0.425817	NA	NA	NA	NA	NA	NA	NA	-0.382857	NA
R40059	NA	NA	NA	NA	NA	NA	NA	NA	NA	-0.461179	NA	NA	NA	NA	-0.481988	NA
R40059	NA	NA	NA	NA	NA	NA	NA	NA	NA	NA	NA	NA	NA	NA	-0.378512	-0.106572
H70464	NA	NA	NA	NA	NA	NA	0.33501	NA	NA	-0.424009	NA	NA	NA	NA	NA	NA
H70464	NA	NA	NA	NA	NA	NA	NA	NA	NA	NA	NA	NA	NA	NA	NA	NA
T66815	-0.639959	-0.980017	0.0786777	0.0238174	-0.0821011	-0.229622	0.0423291	-0.217684	0.253812	0.260026	-0.203003	-0.430446	1.24013	0.269978	1.53652	0.422684
T66815	-0.616983	-0.913195	0.134026	0.000815312	NA	-0.283384	0.0520367	-0.232139	-0.155143	0.252828	-0.0195937	-0.378764	1.20823	0.275308	1.54497	0.493892
AA411169	NA	NA	NA	NA	NA	NA	NA	NA	NA	NA	-0.422233	-0.533348	NA	NA	NA	NA
AA411169	NA	NA	NA	NA	NA	NA	NA	NA	NA	NA	-0.39689	-0.450661	NA	NA	NA	NA
N66028	NA	NA	-0.083557	-0.330824	NA	NA	-0.132638	-0.9404	NA	NA	-0.496536	-0.25434	NA	0.211181	0.245851	-0.210086
N66028	NA	NA	-0.26818	-0.349628	NA	NA	-0.219734	-0.95109	NA	NA	-0.201634	-0.321928	NA	0.330824	-0.15831	-0.0846624
H93310	-0.0364288	-0.512225	-0.0746388	-0.414174	NA	NA	-0.172137	-0.263034	0.154577	0.21811	-0.252187	-0.444529	0.296431	-0.577057	0.689785	-0.662019
H93310	-0.0230836	-0.589129	0.013043	-0.481369	0.259192	NA	-0.231326	-0.209973	0.0376704	0.248259	-0.0978842	-0.572057	0.327082	-0.615465	0.551183	-0.746632
H58953	NA	NA	NA	NA	NA	NA	NA	NA	NA	NA	NA	NA	NA	NA	NA	NA
H58953	NA	NA	NA	NA	NA	NA	NA	NA	NA	NA	NA	NA	NA	NA	NA	NA
N51095	NA	NA	-0.486607	-0.47854	NA	NA	-0.516725	-0.389567	NA	NA	NA	-0.282934	NA	NA	-0.210009	-0.302563
N51095	NA	NA	-0.402098	-0.425817	NA	NA	-0.488462	NA	NA	NA	NA	NA	NA	NA	NA	-0.0976108
H05619	NA	NA	NA	NA	NA	NA	NA	NA	NA	NA	NA	NA	NA	NA	NA	NA
H05619	NA	NA	NA	NA	NA	NA	NA	NA	NA	NA	NA	NA	NA	NA	NA	NA
AA460393	NA	NA	NA	-0.278976	NA	NA	-0.415037	-0.193246	NA	NA	NA	NA	NA	NA	NA	NA
AA460393	NA	NA	NA	-0.137504	NA	NA	-0.473172	-0.341037	NA	NA	NA	NA	NA	NA	NA	-0.0749621
AA282063	-0.0703893	NA	-0.445754	-0.245112	NA	NA	-0.232156	-0.750524	NA	0.0612002	-0.254997	-0.0519521	NA	0.665999	-0.197095	0.200174
AA282063	-0.377235	NA	-0.429489	-0.293141	NA	NA	-0.260038	-0.724495	NA	NA	-0.222986	-0.294743	NA	0.653824	-0.495208	0.484459
T60070	NA	NA	NA	-0.508246	NA	NA	-0.128821	-0.927592	NA	NA	NA	NA	NA	NA	NA	NA
T60070	-0.469946	NA	NA	-0.546581	NA	NA	-0.224873	-0.914349	NA	NA	NA	NA	NA	NA	NA	NA
AA489246	-0.26829	-0.744813	0.0747066	0.232289	NA	NA	0.0967022	0.0904309	NA	NA	0.249846	0.134951	0.467746	0.234853	0.738779	0.326546
AA489246	-0.400145	-0.62293	0.231626	0.206865	NA	NA	0.0915841	0.0851196	NA	0.102787	0.217905	0.296658	0.517265	0.179297	0.705241	0.420142
AA450227	NA	NA	-0.112497	-0.317162	NA	NA	-0.217715	-0.564358	NA	NA	-0.117956	-0.0732382	0.502042	0.175337	0.614413	0.107465
AA450227	-0.115477	NA	-0.156429	-0.245112	NA	NA	-0.240796	-0.730796	NA	NA	-0.162289	-0.164443	0.472829	0.420516	0.469593	0.0625332
AA487614	NA	NA	NA	-0.246915	NA	NA	-0.31982	NA	NA	NA	NA	NA	NA	NA	NA	NA
AA487614	NA	NA	NA	NA	NA	NA	-0.390727	NA	NA	-0.0332762	NA	NA	NA	NA	NA	NA
R52085	NA	NA	-0.102098	-0.393754	NA	NA	-0.300907	-0.860692	NA	NA	-0.0749621	-0.163499	NA	NA	NA	NA
R52085	NA	-0.0565835	-0.0795203	-0.402696	NA	NA	-0.218414	-0.84755	NA	NA	-0.248679	-0.128733	NA	NA	NA	-0.0703893
T53022	-0.106259	-0.731125	-0.250878	NA	0.330149	NA	NA	NA	-0.075862	-0.306331	-0.0795203	NA	-0.403651	-0.0305883	-0.824913	-0.560416
T53022	-0.0993214	-0.564177	-0.254183	NA	-0.0611115	NA	NA	NA	-0.0719152	0.370715	NA	NA	-0.37171	0.057562	-0.766801	-0.504043
H97778	-0.384386	-0.789078	-0.418404	-0.390097	-0.0959167	-0.348535	-0.182154	-0.606693	-0.192645	0.328219	-0.245613	-0.119202	0.546236	-0.652973	0.950255	-0.711815
H97778	-0.393322	-0.939836	-0.349435	-0.392705	-0.0122914	-0.455714	-0.202608	-0.60114	-0.0920094	0.319836	-0.221266	-0.109864	0.5075	-0.628477	0.953445	-0.686709
AA456291	NA	NA	0.426707	0.24262	NA	NA	0.233321	0.0143553	NA	NA	NA	0.259213	0.614487	0.695054	0.833054	0.903004
AA456291	-0.154886	-0.218265	0.5062	0.167786	NA	NA	0.284143	NA	NA	-0.0145361	0.172795	0.263034	0.54878	0.689598	0.992144	0.884234
AA455272	-0.517089	-0.731269	-0.322447	-0.509288	NA	NA	-0.0126553	-0.738073	NA	NA	-0.256401	-0.166854	0.680152	0.159348	0.575618	0.188719
AA455272	-0.221307	-0.624032	-0.399137	-0.549557	NA	NA	-0.0206237	-0.767339	NA	NA	-0.312407	-0.185461	0.661415	0.195994	0.548071	0.322264
T65407	NA	NA	NA	NA	NA	NA	NA	NA	NA	NA	NA	NA	NA	NA	NA	NA
T65407	NA	NA	NA	NA	NA	NA	NA	NA	NA	NA	NA	NA	NA	NA	NA	NA
AA148641	NA	NA	-0.754175	-1.07952	NA	NA	-0.913288	-0.892715	NA	NA	NA	-0.218265	NA	0.0238467	NA	NA
AA148641	NA	NA	-0.992768	-1.02385	NA	NA	-0.900464	-1.07039	NA	NA	-0.146221	-0.359896	NA	0.0795203	NA	0.0612002
AA455301	-0.347923	NA	0.280713	0.206643	NA	NA	0.332723	0.0795323	NA	0.126316	0.264726	0.208035	0.147492	-0.149161	0.708753	0.106429
AA455301	-0.0332762	-0.805427	0.272912	0.160394	NA	NA	0.336907	0.101137	NA	0.306839	0.327615	0.211438	0.216456	-0.148975	0.697958	0.0891682
AA464568	-0.0612507	-0.574613	0.018215	0.0212059	0.0414001	-0.228537	0.00325624	-0.190255	-0.0749621	0.316744	-0.0227097	-0.0442301	0.624518	0.844924	0.780702	0.938155
AA464568	-0.0683489	-0.164082	-0.0475817	-0.0245816	-0.0991555	-0.229386	0.0041044	-0.207979	0.370117	0.393242	0.000154373	-0.102929	0.676	0.830767	0.834844	0.938199
AA609880	-0.288648	-0.494212	-0.293025	-0.606442	NA	NA	-0.260268	-0.917538	NA	NA	-0.211919	-0.208434	NA	NA	NA	NA
AA609880	-0.239297	-0.667716	-0.535826	-0.849485	NA	NA	-0.346471	-0.845248	NA	NA	-0.274281	-0.22654	NA	NA	NA	NA
AA598510	NA	NA	0.0843623	0.0643569	NA	NA	0.185507	0.0119037	NA	NA	0.22944	0.273668	0.191692	0.195869	0.305015	0.351142
AA598510	-0.410168	NA	-0.0593471	0.115855	NA	NA	0.211673	-0.0973358	NA	NA	0.157871	0.191752	0.13047	0.216296	0.412932	0.449058
AA598527	NA	NA	NA	-0.287047	NA	NA	-0.414034	-0.610385	NA	NA	NA	NA	NA	NA	NA	NA
AA598527	NA	NA	NA	-0.516015	NA	NA	-0.569749	-0.796321	NA	-0.275007	NA	NA	NA	NA	NA	NA
AA253430	-0.106572	-0.290818	-0.323417	-0.270149	NA	NA	-0.188746	-0.767429	NA	-0.853375	-0.151488	-0.171046	NA	NA	NA	NA
AA253430	-0.41976	-0.733327	-0.199309	-0.350999	NA	NA	-0.232977	-0.639569	NA	NA	-0.167426	-0.173238	NA	NA	NA	NA
AA404327	-0.173332	-0.702456	-0.482535	-0.215942	0.0814044	NA	-0.183705	-0.45886	-0.141869	NA	-0.0955777	NA	0.221272	-0.183446	-0.0337488	-0.504231
AA404327	-0.250962	-0.549406	-0.335603	-0.178337	-0.0536879	NA	-0.118594	-0.537266	-0.0658021	0.457207	-0.0257631	-0.146221	0.371424	-0.118866	-0.0951572	-0.604745
AA449678	-0.381146	-0.586441	-0.483634	-0.510924	NA	NA	-0.317029	-0.820734	NA	-0.395731	-0.216649	-0.220104	NA	0.512648	0.204952	0.352382
AA449678	NA	-0.596968	-0.552764	-0.465902	NA	NA	-0.425128	-0.681074	NA	NA	-0.211831	-0.218749	NA	0.555816	0.180572	0.559084
R76263	-0.390952	-0.0473057	0.00373346	-0.0198448	NA	NA	0.110188	-0.111317	NA	NA	0.0550301	0.239759	0.0777461	0.0780273	0.407944	0.11565
R76263	-0.289876	NA	0.104329	-0.00381161	NA	NA	0.118516	-0.133995	NA	NA	0.00789037	0.224389	0.0326521	0.0305227	0.304701	0.225373
AA598836	NA	NA	NA	NA	NA	NA	-0.400629	NA	NA	NA	NA	NA	NA	0.218265	-0.0141789	-0.101445
AA598836	NA	NA	NA	NA	NA	NA	-0.363748	NA	NA	NA	NA	NA	NA	0.234706	-0.425817	-0.197446
H14383	NA	NA	NA	NA	NA	NA	NA	NA	NA	NA	NA	NA	NA	NA	-0.0426443	NA
H14383	NA	NA	NA	NA	NA	NA	NA	NA	NA	NA	NA	NA	NA	NA	-0.106572	NA
H73241	-0.586538	NA	-0.109788	-0.189421	NA	NA	0.503878	-0.372617	NA	NA	-0.0155969	0.143419	1.8053	-0.975955	2.00356	-1.11612
H73241	-0.474296	NA	0.0651376	-0.224631	NA	NA	0.55661	-0.383666	NA	-0.91584	0.0647703	0.00357545	1.90933	-0.955146	2.14767	-0.887954
H86518	NA	NA	NA	-0.193246	NA	NA	-0.274262	-0.341037	NA	NA	NA	NA	NA	NA	NA	NA
H86518	NA	NA	NA	-0.352382	NA	NA	-0.262308	-0.0840643	NA	-0.854481	NA	NA	NA	NA	NA	NA
AA011347	0.0760134	-0.468012	-0.513431	-0.633157	NA	NA	-0.592974	-0.725378	NA	NA	-0.72094	-0.416726	NA	-0.138236	NA	NA
AA011347	0.0384139	-0.371471	-0.554102	-0.505955	NA	NA	-0.498522	-0.728283	NA	NA	-0.709099	-0.555636	NA	-0.170392	NA	NA
AA431813	NA	NA	NA	-0.420843	NA	NA	-0.24549	-0.731319	NA	NA	NA	NA	NA	NA	NA	0
AA431813	NA	NA	NA	-0.50731	NA	NA	-0.482417	-0.68646	NA	NA	NA	NA	NA	NA	NA	NA
AA147594	NA	NA	NA	-0.606246	NA	NA	-0.324298	-0.41864	NA	NA	NA	NA	NA	NA	NA	NA
AA147594	NA	NA	NA	-0.539366	NA	NA	-0.360217	-0.214125	NA	NA	-0.00958605	NA	NA	NA	NA	NA
AA463924	-0.461014	-1.00588	-0.294244	-0.179541	0.228317	-0.47986	0.116479	-0.489561	-0.0344884	NA	-0.149531	-0.162875	0.232088	-0.0537482	0.446051	0.0630852
AA463924	-0.504318	-1.10107	-0.291762	-0.203392	0.114925	-0.572856	0.144953	-0.507022	-0.298687	NA	-0.165028	-0.0868037	0.283627	-0.022977	0.459914	0.0675737
N36174	-0.0345655	-0.0654231	-0.502809	-0.809435	0.0580691	-0.544805	-0.572116	-0.88146	-0.0748679	-0.188918	-0.237189	-0.234879	NA	NA	-0.254997	-0.119909
N36174	-0.157212	-0.125077	-0.447108	-0.756886	0.0130798	-0.588165	-0.482801	-1.01486	-0.130683	-0.62605	-0.452977	-0.255971	NA	NA	-0.306457	-0.0703893
W93379	-0.456167	-0.671596	-0.6953	-0.897289	-0.320384	NA	-0.715799	-1.18006	-0.551115	0.207545	-0.958768	-0.651072	-1.81967	-3.10545	-1.91966	-2.0658
W93379	-0.23081	-0.611657	-0.713333	-0.915466	NA	NA	-0.734094	-1.23771	-0.616671	0.0107397	-0.873672	-0.640592	-1.81967	-3.24031	-1.95606	-2.16242
AA457153	-0.353637	-0.681318	0.121391	-0.210903	NA	NA	0.186896	-0.27616	NA	NA	0.343954	0.123809	0.321399	0.642287	0.565547	0.991963
AA457153	-0.358327	-0.102098	0.0538227	-0.0945176	NA	NA	0.164963	-0.335282	NA	NA	0.374377	0.184207	0.301909	0.707274	0.767178	1.0628
N50745	0.00490435	-0.187548	0.0402951	-0.00667401	NA	NA	0.19164	-0.516015	NA	-0.141914	-0.0692627	-0.078161	-1.05274	-1.44383	-1.345	-1.53594
N50745	0.0367505	-0.47671	0.12797	0.00739213	NA	NA	0.153709	-0.461179	NA	0.0158914	-0.214778	0.00778259	-0.94854	-1.41047	-1.19965	-1.54378
AA464267	0.059752	-0.148789	0.00869096	-0.331942	0.225213	-0.0901978	-0.142253	-0.278976	0.271872	NA	-0.039834	0.174592	0.317127	0.46347	0.521996	0.389004
AA464267	0.00791966	-0.122818	0.0206924	-0.241329	0.394207	-0.193246	-0.0803421	-0.238787	0.109451	NA	0.118333	0.0829363	0.21494	0.518291	0.388594	0.473848
N91962	-0.42169	-0.749048	-0.880947	-0.0519521	-0.286881	NA	-0.644936	NA	NA	NA	-0.472432	-0.41105	-0.413808	-0.398467	-0.731539	-0.607247
N91962	-0.375554	-0.765641	-0.60921	NA	-0.208317	NA	-0.656623	NA	NA	NA	-0.531592	-0.240177	-0.414412	-0.387623	-0.805519	-0.74103
AA421819	-0.214229	-0.494765	NA	NA	0.0189945	-0.264171	NA	NA	-0.276198	0.274839	NA	NA	NA	NA	NA	NA
AA421819	-0.310199	-0.512206	NA	NA	-0.00806427	-0.411285	NA	NA	-0.212581	0.351472	NA	NA	NA	NA	NA	NA
AA152347	-0.223826	-0.345965	-0.525015	-0.56075	-0.0348643	-0.351911	-0.400199	-0.93688	-0.250835	0.249995	-0.335184	-0.259708	1.04731	0.782409	0.464668	0.0426443
AA152347	-0.22302	-0.496087	-0.322874	-0.686711	-0.0614529	-0.320228	-0.319027	-0.895663	-0.267158	NA	-0.397849	-0.29516	1.05658	0.785202	0.843351	0.303392
AA669126	-0.21834	-0.433633	-0.696978	-0.775506	-0.0200179	-0.235159	-0.689631	-1.11754	-0.0888171	0.719735	-0.659218	-0.997684	0.143704	0.489827	-0.0955558	0.194894
AA669126	-0.150679	-0.459646	-0.640161	-0.741506	-0.0278983	-0.284875	-0.748709	-1.09354	-0.0979138	0.583946	-0.77954	-0.946772	0.115477	0.469567	-0.0701611	0.114482
AA035384	-0.244058	-0.588695	-0.23618	-0.353531	-0.074618	-0.250543	-0.301864	-0.569089	-0.201822	0.472612	-0.375212	-0.292637	-0.00885092	0.366489	0.133554	0.446922
AA035384	-0.255303	-0.546529	-0.274465	-0.320106	-0.0920997	-0.287047	-0.305597	-0.557028	-0.0061002	-0.505503	-0.541549	-0.322742	-0.0852975	0.303637	0.198963	0.128412
AA682293	-0.226509	-0.704872	NA	NA	NA	NA	NA	NA	NA	0.536323	NA	NA	NA	NA	NA	NA
AA682293	NA	-0.716625	NA	NA	NA	NA	NA	NA	NA	NA	NA	NA	NA	NA	NA	NA
N25945	-0.442897	-0.801848	NA	-0.869213	NA	NA	-0.873717	-1.58175	NA	NA	NA	NA	NA	NA	NA	NA
N25945	-0.256411	-0.0238467	NA	-0.745596	NA	NA	-0.917211	-1.03092	NA	NA	NA	NA	NA	NA	NA	NA
AA430552	-0.0658021	-0.529405	NA	0	NA	NA	-0.15899	-0.15056	NA	NA	NA	NA	NA	NA	NA	NA
AA430552	NA	NA	NA	-0.0658021	NA	NA	-0.0143553	-0.124328	NA	0.394043	NA	NA	NA	NA	NA	NA
AA129171	NA	NA	NA	NA	NA	NA	-0.0185558	NA	NA	NA	NA	NA	NA	NA	0.378512	NA
AA129171	NA	NA	NA	NA	NA	NA	NA	NA	NA	NA	NA	-0.425817	NA	NA	0.341037	0.184809
N26665	NA	NA	NA	NA	NA	NA	NA	NA	NA	NA	NA	NA	NA	NA	NA	NA
N26665	NA	NA	NA	NA	NA	NA	NA	NA	NA	NA	NA	NA	NA	NA	NA	NA
AA010352	NA	-0.575312	-0.310528	-0.422233	NA	NA	-0.625478	NA	NA	-0.0885939	-0.537757	-0.639683	NA	0.341393	-0.0939001	-0.201634
AA010352	NA	-0.488858	-0.312189	-0.0426443	NA	NA	-0.484643	NA	NA	NA	-0.434512	-0.513001	NA	0.304122	-0.163499	-0.159199
AA630776	-0.307153	-0.30181	-0.0885873	-0.169925	0.00480099	NA	-0.0900637	NA	NA	NA	-0.00695276	-0.00831527	NA	0.63846	0.581448	0.619345
AA630776	-0.336812	-0.307509	-0.033207	-0.234706	0.133125	NA	-0.149636	NA	NA	NA	-0.108593	-0.0625014	NA	0.580286	0.552541	0.621755
AA678295	NA	NA	NA	NA	NA	NA	NA	NA	NA	NA	NA	NA	NA	NA	NA	NA
AA678295	NA	NA	NA	NA	NA	NA	NA	NA	NA	NA	NA	NA	NA	NA	NA	NA
AA496887	-0.359996	-0.792163	-0.465664	-0.618792	-0.314873	NA	-0.442578	-0.876911	-0.449461	-0.604071	-0.405533	-0.405063	0.697041	1.15505	0.133125	0.966669
AA496887	-0.466985	-0.933038	-0.509843	-0.613751	-0.345573	-0.230613	-0.421423	-0.910391	-0.501463	0.0815299	-0.487779	-0.737752	0.699055	1.15998	0.263034	0.968577
AA488332	-0.280555	-0.563238	-0.179583	-0.223226	0.0404216	-0.232196	-0.35302	-0.468676	-0.169167	0.205487	-0.0179473	-0.102633	-0.461724	-0.665048	-0.352463	-0.549187
AA488332	-0.258127	-0.51499	-0.180292	-0.151455	0.0697703	-0.219487	-0.345329	-0.479255	-0.244434	0.170052	0.0650523	-0.131821	-0.491417	-0.654296	-0.331888	-0.617336
AA186348	NA	NA	NA	0.0140478	NA	NA	0.0149697	-0.27081	NA	NA	NA	-0.119909	0.522725	NA	1.17883	0.684615
AA186348	NA	NA	NA	0.0617433	NA	NA	0.0397358	-0.168443	NA	-0.56242	0.516015	-0.238787	0.306457	NA	1.17509	0.840374
AA608512	-0.315167	NA	NA	-0.294229	NA	NA	-0.109549	-0.724608	NA	NA	NA	NA	NA	NA	NA	NA
AA608512	-0.359896	-0.0840643	NA	-0.174605	NA	NA	-0.503644	-0.367305	NA	NA	NA	NA	NA	NA	NA	NA
AA186327	-0.206538	-0.449861	-0.268458	-0.537794	-0.0240169	NA	-0.493436	-0.904304	-0.337751	-0.212331	-0.186743	-0.406728	-0.00831527	-0.122102	-0.397942	-0.261018
AA186327	-0.130433	-0.4082	-0.322187	-0.400555	NA	-0.394992	-0.551227	-0.988724	-0.514573	-0.229895	-0.224291	-0.793013	-0.0918389	-0.192295	-0.468696	-0.423851
W47362	NA	-0.163499	NA	-0.0658021	NA	NA	0.0167952	-0.250962	NA	NA	NA	NA	NA	NA	NA	NA
W47362	NA	-0.275007	NA	-0.352722	NA	NA	-0.00300249	NA	NA	NA	NA	NA	NA	NA	NA	NA
W46577	NA	NA	NA	NA	NA	NA	NA	NA	NA	-0.465562	NA	NA	NA	NA	NA	NA
W46577	NA	NA	NA	NA	NA	NA	NA	NA	NA	NA	NA	NA	NA	NA	NA	NA
AA630302	NA	NA	NA	-0.308122	NA	NA	-0.173506	NA	NA	NA	NA	NA	NA	NA	NA	NA
AA630302	NA	NA	NA	-0.324597	NA	NA	-0.110583	NA	NA	NA	NA	NA	NA	NA	NA	NA
R73584	-0.149747	-0.419394	NA	NA	NA	NA	NA	NA	NA	NA	NA	NA	NA	NA	NA	NA
R73584	-0.164984	-0.374158	NA	NA	NA	NA	NA	NA	NA	-0.0911479	NA	NA	NA	NA	NA	NA
AA633751	-0.215877	-0.641256	-0.053581	NA	-0.251539	NA	0.0374747	NA	NA	NA	0.130012	0.0605047	NA	-0.216886	0.175909	-0.124468
AA633751	-0.108447	-0.452181	0.0281785	NA	0.0942153	-0.20581	NA	NA	NA	NA	0.0311056	0.095941	NA	-0.243494	0.326156	-0.244569
N58558	-0.485427	-0.468149	NA	NA	NA	NA	NA	NA	NA	NA	NA	NA	NA	NA	NA	NA
N58558	-0.309152	NA	NA	NA	NA	NA	NA	NA	NA	NA	NA	NA	NA	NA	NA	NA
N62245	-0.462478	-0.575334	NA	NA	NA	NA	NA	NA	NA	NA	NA	NA	NA	NA	NA	NA
N62245	-0.199309	-0.616085	NA	NA	NA	NA	NA	NA	NA	NA	NA	NA	NA	NA	NA	NA
AA495724	-0.107756	-0.414919	0.158321	0.0194649	0.142889	0.0165038	0.0486301	-0.318099	-0.158129	-0.600859	0.208515	-0.23881	1.13771	0.390503	1.21716	0.734094
AA495724	-0.0798799	-0.446242	0.147769	0	-0.165726	0.115953	0.0800323	-0.516911	-0.152999	-0.801937	0.359328	-0.241712	0.856232	0.312025	1.22778	0.70382
AA477501	NA	NA	NA	NA	NA	NA	-0.0588937	NA	NA	NA	NA	NA	NA	NA	NA	NA
AA477501	NA	-0.246915	NA	NA	NA	NA	-0.139951	-0.667967	NA	NA	NA	NA	NA	NA	NA	NA
R96527	-0.458646	-0.802351	0.117341	0.0743728	0.237734	0.0489743	0.170573	-0.206305	0.0976849	NA	0.00447348	-0.0702604	1.03837	0.740829	1.32286	0.824839
R96527	-0.517498	-0.84584	0.136971	0.0826799	0.222249	0.0353566	0.168588	-0.183172	-0.014942	0.310474	0.14757	0.0474253	1.11091	0.715489	1.26272	0.85201
R11698	0.202138	-0.154034	0.201239	-0.0922036	NA	NA	0.2658	-0.299348	NA	-0.086071	0.446167	-0.162004	NA	NA	0.897886	1.39463
[truncated: 11,249 more rows]
